# Supplementary material for: Identification and functional analysis of ovarian lncRNAs during different egg laying periods in Taihe Black-Bone Chickens
Source: Frontiers journal article supplement (doi:10.3389/fphys.2024.1358682), 2024-02-15
Supplement: Data_Sheet_1.ZIP [file Data_Sheet_1.ZIP]

GO_accession	Description	Term_type	Over_represented_pValue	Corrected_pValue	CAD_item	CAD_list	Bg_item	Bg_list	Gene_names
GO:0044421	extracellular region part	cellular_component	8.9661e-26	1.773e-21	83	361	946	15035	ENSGALG00000006552,ENSGALG00000013409,ENSGALG00000000364,ENSGALG00000001559,ENSGALG00000034119,ENSGALG00000049551,ENSGALG00000018557,ENSGALG00000040672,ENSGALG00000004526,ENSGALG00000008660,ENSGALG00000029819,ENSGALG00000003003,ENSGALG00000042626,ENSGALG00000004593,ENSGALG00000036189,ENSGALG00000005968,ENSGALG00000033974,ENSGALG00000040857,ENSGALG00000002503,ENSGALG00000007047,ENSGALG00000014686,…
GO:0005576	extracellular region	cellular_component	1.2659e-23	1.2517e-19	90	361	1180	15035	ENSGALG00000019312,ENSGALG00000036346,ENSGALG00000003589,ENSGALG00000034934,ENSGALG00000003034,ENSGALG00000002893,ENSGALG00000016843,ENSGALG00000005180,ENSGALG00000006992,ENSGALG00000005086,ENSGALG00000034150,ENSGALG00000051054,ENSGALG00000031997,ENSGALG00000007358,ENSGALG00000054770,ENSGALG00000013090,ENSGALG00000031112,ENSGALG00000019552,ENSGALG00000002987,ENSGALG00000012872,ENSGALG00000046616,…
GO:0005615	extracellular space	cellular_component	6.2928e-22	4.148e-18	70	361	786	15035	ENSGALG00000000639,ENSGALG00000036142,ENSGALG00000009179,ENSGALG00000016713,ENSGALG00000001115,ENSGALG00000032031,ENSGALG00000036798,ENSGALG00000004184,ENSGALG00000011104,ENSGALG00000027973,ENSGALG00000014997,ENSGALG00000054196,ENSGALG00000033256,ENSGALG00000009641,ENSGALG00000007047,ENSGALG00000002503,ENSGALG00000005968,ENSGALG00000033974,ENSGALG00000036189,ENSGALG00000004593,ENSGALG00000029819,…
GO:0031012	extracellular matrix	cellular_component	5.7097e-15	2.8228e-11	32	361	252	15035	ENSGALG00000032031,ENSGALG00000015624,ENSGALG00000036798,ENSGALG00000004184,ENSGALG00000003589,ENSGALG00000005180,ENSGALG00000000639,ENSGALG00000016843,ENSGALG00000007358,ENSGALG00000014686,ENSGALG00000009641,ENSGALG00000006992,ENSGALG00000040857,ENSGALG00000005968,ENSGALG00000042079,ENSGALG00000015253,ENSGALG00000038364,ENSGALG00000011200,ENSGALG00000032974,ENSGALG00000031112,ENSGALG00000043555,…
GO:0099503	secretory vesicle	cellular_component	3.9955e-12	1.5802e-08	27	361	227	15035	ENSGALG00000029298,ENSGALG00000042626,ENSGALG00000010331,ENSGALG00000040045,ENSGALG00000032958,ENSGALG00000053549,ENSGALG00000006453,ENSGALG00000004184,ENSGALG00000038241,ENSGALG00000027973,ENSGALG00000029819,ENSGALG00000010820,ENSGALG00000014726,ENSGALG00000009003,ENSGALG00000009626,ENSGALG00000001693,ENSGALG00000046616,ENSGALG00000009289,ENSGALG00000031343,ENSGALG00000011200,ENSGALG00000014997,…
GO:0043062	extracellular structure organization	biological_process	5.4037e-12	1.781e-08	26	361	212	15035	ENSGALG00000006992,ENSGALG00000005968,ENSGALG00000009641,ENSGALG00000034119,ENSGALG00000013090,ENSGALG00000031112,ENSGALG00000002987,ENSGALG00000041555,ENSGALG00000011347,ENSGALG00000043555,ENSGALG00000004526,ENSGALG00000042079,ENSGALG00000004833,ENSGALG00000032974,ENSGALG00000015253,ENSGALG00000036798,ENSGALG00000003589,ENSGALG00000016713,ENSGALG00000032031,ENSGALG00000016480,ENSGALG00000004593,…
GO:0030198	extracellular matrix organization	biological_process	1.0526e-11	2.9737e-08	24	361	185	15035	ENSGALG00000004833,ENSGALG00000032974,ENSGALG00000015253,ENSGALG00000042079,ENSGALG00000004526,ENSGALG00000041555,ENSGALG00000043555,ENSGALG00000011347,ENSGALG00000013090,ENSGALG00000031112,ENSGALG00000002987,ENSGALG00000009641,ENSGALG00000034119,ENSGALG00000005968,ENSGALG00000006992,ENSGALG00000005180,ENSGALG00000016843,ENSGALG00000000909,ENSGALG00000004593,ENSGALG00000011214,ENSGALG00000036142,…
GO:0062023	collagen-containing extracellular matrix	cellular_component	9.3698e-11	2.3161e-07	19	361	127	15035	ENSGALG00000005180,ENSGALG00000036798,ENSGALG00000003589,ENSGALG00000004184,ENSGALG00000001407,ENSGALG00000018557,ENSGALG00000031112,ENSGALG00000041555,ENSGALG00000009626,ENSGALG00000043555,ENSGALG00000004526,ENSGALG00000042079,ENSGALG00000032974,ENSGALG00000011200,ENSGALG00000040857,ENSGALG00000034119,ENSGALG00000009641,ENSGALG00000011740,ENSGALG00000007358
GO:0030141	secretory granule	cellular_component	2.8403e-09	6.2407e-06	18	361	134	15035	ENSGALG00000031343,ENSGALG00000011200,ENSGALG00000014997,ENSGALG00000009626,ENSGALG00000046616,ENSGALG00000034150,ENSGALG00000009725,ENSGALG00000048923,ENSGALG00000053549,ENSGALG00000040045,ENSGALG00000042626,ENSGALG00000029298,ENSGALG00000029819,ENSGALG00000010820,ENSGALG00000006453,ENSGALG00000004184,ENSGALG00000038241,ENSGALG00000027973
GO:0032501	multicellular organismal process	biological_process	9.1133e-09	1.8022e-05	143	361	4009	15035	ENSGALG00000015624,ENSGALG00000036798,ENSGALG00000039659,ENSGALG00000034831,ENSGALG00000004184,ENSGALG00000032031,ENSGALG00000013616,ENSGALG00000043662,ENSGALG00000006775,ENSGALG00000039690,ENSGALG00000006413,ENSGALG00000016785,ENSGALG00000011200,ENSGALG00000038364,ENSGALG00000001191,ENSGALG00000012894,ENSGALG00000011086,ENSGALG00000004593,ENSGALG00000042626,ENSGALG00000053747,ENSGALG00000036189,…
GO:0005201	extracellular matrix structural constituent	molecular_function	1.4612e-08	2.6269e-05	11	361	50	15035	ENSGALG00000031112,ENSGALG00000016843,ENSGALG00000041555,ENSGALG00000005180,ENSGALG00000015253,ENSGALG00000036798,ENSGALG00000040857,ENSGALG00000014686,ENSGALG00000009641,ENSGALG00000034119,ENSGALG00000051882
GO:0048731	system development	biological_process	7.2606e-08	0.00011965	105	361	2755	15035	ENSGALG00000011086,ENSGALG00000030607,ENSGALG00000029819,ENSGALG00000008660,ENSGALG00000001191,ENSGALG00000010179,ENSGALG00000036189,ENSGALG00000014786,ENSGALG00000042626,ENSGALG00000004593,ENSGALG00000016905,ENSGALG00000045052,ENSGALG00000000364,ENSGALG00000006552,ENSGALG00000007305,ENSGALG00000030822,ENSGALG00000003521,ENSGALG00000004526,ENSGALG00000036497,ENSGALG00000006343,ENSGALG00000031343,…
GO:0030199	collagen fibril organization	biological_process	1.2215e-07	0.00018422	9	361	36	15035	ENSGALG00000005968,ENSGALG00000032974,ENSGALG00000004833,ENSGALG00000041555,ENSGALG00000036142,ENSGALG00000011214,ENSGALG00000031112,ENSGALG00000002987,ENSGALG00000013090
GO:0032502	developmental process	biological_process	1.3042e-07	0.00018422	125	361	3508	15035	ENSGALG00000000364,ENSGALG00000001559,ENSGALG00000007959,ENSGALG00000006552,ENSGALG00000007305,ENSGALG00000030822,ENSGALG00000003521,ENSGALG00000004526,ENSGALG00000036497,ENSGALG00000006343,ENSGALG00000031343,ENSGALG00000014908,ENSGALG00000049157,ENSGALG00000013956,ENSGALG00000009003,ENSGALG00000005707,ENSGALG00000016945,ENSGALG00000030607,ENSGALG00000011086,ENSGALG00000029819,ENSGALG00000008660,…
GO:0042221	response to chemical	biological_process	2.3343e-07	0.00030774	93	361	2379	15035	ENSGALG00000003005,ENSGALG00000037522,ENSGALG00000027786,ENSGALG00000028871,ENSGALG00000036001,ENSGALG00000002015,ENSGALG00000013616,ENSGALG00000016713,ENSGALG00000004184,ENSGALG00000027973,ENSGALG00000011104,ENSGALG00000003547,ENSGALG00000036798,ENSGALG00000038364,ENSGALG00000016785,ENSGALG00000008283,ENSGALG00000043555,ENSGALG00000039690,ENSGALG00000054196,ENSGALG00000007047,ENSGALG00000003014,…
GO:0007275	multicellular organism development	biological_process	2.8098e-07	0.00034727	108	361	2938	15035	ENSGALG00000023542,ENSGALG00000008614,ENSGALG00000029836,ENSGALG00000011740,ENSGALG00000000607,ENSGALG00000004285,ENSGALG00000000653,ENSGALG00000047554,ENSGALG00000009289,ENSGALG00000041555,ENSGALG00000009626,ENSGALG00000011347,ENSGALG00000043754,ENSGALG00000033520,ENSGALG00000032320,ENSGALG00000014716,ENSGALG00000006453,ENSGALG00000009488,ENSGALG00000007620,ENSGALG00000026098,ENSGALG00000011214,…
GO:0098644	complex of collagen trimers	cellular_component	3.2226e-07	0.00037486	5	361	8	15035	ENSGALG00000031112,ENSGALG00000036798,ENSGALG00000041555,ENSGALG00000005180,ENSGALG00000009641
GO:0048856	anatomical structure development	biological_process	5.1274e-07	0.00055204	117	361	3302	15035	ENSGALG00000042241,ENSGALG00000033974,ENSGALG00000005968,ENSGALG00000011242,ENSGALG00000014686,ENSGALG00000003014,ENSGALG00000007047,ENSGALG00000039690,ENSGALG00000033256,ENSGALG00000015495,ENSGALG00000043555,ENSGALG00000042079,ENSGALG00000032974,ENSGALG00000011200,ENSGALG00000038364,ENSGALG00000040432,ENSGALG00000015624,ENSGALG00000036798,ENSGALG00000039659,ENSGALG00000034831,ENSGALG00000004184,…
GO:0051046	regulation of secretion	biological_process	5.304e-07	0.00055204	28	361	410	15035	ENSGALG00000004917,ENSGALG00000010179,ENSGALG00000015898,ENSGALG00000013616,ENSGALG00000002015,ENSGALG00000042626,ENSGALG00000012456,ENSGALG00000010820,ENSGALG00000014726,ENSGALG00000016480,ENSGALG00000023521,ENSGALG00000012894,ENSGALG00000011104,ENSGALG00000038241,ENSGALG00000000168,ENSGALG00000004833,ENSGALG00000038364,ENSGALG00000028770,ENSGALG00000036497,ENSGALG00000016785,ENSGALG00000003560,…
GO:0008519	ammonium transmembrane transporter activity	molecular_function	1.0541e-06	0.0010422	7	361	24	15035	ENSGALG00000016804,ENSGALG00000015055,ENSGALG00000001693,ENSGALG00000015439,ENSGALG00000009289,ENSGALG00000017216,ENSGALG00000003560
GO:0031224	intrinsic component of membrane	cellular_component	1.4694e-06	0.0013837	132	361	3873	15035	ENSGALG00000039151,ENSGALG00000012894,ENSGALG00000006440,ENSGALG00000041143,ENSGALG00000053747,ENSGALG00000009349,ENSGALG00000033855,ENSGALG00000004593,ENSGALG00000042626,ENSGALG00000017234,ENSGALG00000001559,ENSGALG00000000745,ENSGALG00000039356,ENSGALG00000007959,ENSGALG00000021303,ENSGALG00000038405,ENSGALG00000016945,ENSGALG00000030545,ENSGALG00000032031,ENSGALG00000016128,ENSGALG00000006775,…
GO:0006836	neurotransmitter transport	biological_process	1.6823e-06	0.0014552	16	361	166	15035	ENSGALG00000011673,ENSGALG00000015439,ENSGALG00000041122,ENSGALG00000015332,ENSGALG00000009289,ENSGALG00000003560,ENSGALG00000001693,ENSGALG00000009003,ENSGALG00000016804,ENSGALG00000012894,ENSGALG00000017216,ENSGALG00000004917,ENSGALG00000008177,ENSGALG00000000909,ENSGALG00000002015,ENSGALG00000042626
GO:0001501	skeletal system development	biological_process	1.6926e-06	0.0014552	25	361	358	15035	ENSGALG00000011214,ENSGALG00000043064,ENSGALG00000004593,ENSGALG00000030607,ENSGALG00000032031,ENSGALG00000040276,ENSGALG00000040432,ENSGALG00000019312,ENSGALG00000015624,ENSGALG00000006453,ENSGALG00000004184,ENSGALG00000036497,ENSGALG00000038364,ENSGALG00000004833,ENSGALG00000031112,ENSGALG00000011347,ENSGALG00000041555,ENSGALG00000033256,ENSGALG00000011740,ENSGALG00000014686,ENSGALG00000041640,…
GO:0016021	integral component of membrane	cellular_component	2.3649e-06	0.0019486	130	361	3816	15035	ENSGALG00000040038,ENSGALG00000033520,ENSGALG00000010801,ENSGALG00000009289,ENSGALG00000003560,ENSGALG00000010865,ENSGALG00000016480,ENSGALG00000032320,ENSGALG00000014716,ENSGALG00000037285,ENSGALG00000036925,ENSGALG00000054710,ENSGALG00000000168,ENSGALG00000010331,ENSGALG00000024056,ENSGALG00000029298,ENSGALG00000016699,ENSGALG00000034150,ENSGALG00000016296,ENSGALG00000008032,ENSGALG00000023521,…
GO:0005581	collagen trimer	cellular_component	2.5604e-06	0.0020252	8	361	38	15035	ENSGALG00000016843,ENSGALG00000041555,ENSGALG00000031112,ENSGALG00000015253,ENSGALG00000005180,ENSGALG00000036798,ENSGALG00000009641,ENSGALG00000034119
GO:0015696	ammonium transport	biological_process	3.187e-06	0.002424	10	361	66	15035	ENSGALG00000008177,ENSGALG00000001693,ENSGALG00000015055,ENSGALG00000009289,ENSGALG00000003560,ENSGALG00000042626,ENSGALG00000002015,ENSGALG00000016804,ENSGALG00000017216,ENSGALG00000015439
GO:0016020	membrane	cellular_component	3.377e-06	0.00245	180	361	5821	15035	ENSGALG00000052981,ENSGALG00000032184,ENSGALG00000015833,ENSGALG00000019114,ENSGALG00000043754,ENSGALG00000029354,ENSGALG00000011347,ENSGALG00000026808,ENSGALG00000011673,ENSGALG00000028602,ENSGALG00000000653,ENSGALG00000000607,ENSGALG00000023542,ENSGALG00000015439,ENSGALG00000040045,ENSGALG00000032958,ENSGALG00000004917,ENSGALG00000008177,ENSGALG00000031058,ENSGALG00000033638,ENSGALG00000006633,…
GO:0060349	bone morphogenesis	biological_process	3.469e-06	0.00245	11	361	81	15035	ENSGALG00000041555,ENSGALG00000011347,ENSGALG00000011214,ENSGALG00000006453,ENSGALG00000040432,ENSGALG00000023542,ENSGALG00000040276,ENSGALG00000032031,ENSGALG00000000364,ENSGALG00000041640,ENSGALG00000031997
GO:0023056	positive regulation of signaling	biological_process	3.7891e-06	0.0025837	48	361	1017	15035	ENSGALG00000000653,ENSGALG00000049551,ENSGALG00000000607,ENSGALG00000040672,ENSGALG00000031343,ENSGALG00000036497,ENSGALG00000004526,ENSGALG00000041555,ENSGALG00000009626,ENSGALG00000009003,ENSGALG00000011347,ENSGALG00000003560,ENSGALG00000049157,ENSGALG00000047554,ENSGALG00000003003,ENSGALG00000006453,ENSGALG00000038241,ENSGALG00000014716,ENSGALG00000000168,ENSGALG00000010331,ENSGALG00000008177,…
GO:0046903	secretion	biological_process	4.115e-06	0.0026546	34	361	616	15035	ENSGALG00000010179,ENSGALG00000004917,ENSGALG00000042626,ENSGALG00000033638,ENSGALG00000015898,ENSGALG00000012894,ENSGALG00000016480,ENSGALG00000010820,ENSGALG00000000168,ENSGALG00000038241,ENSGALG00000036497,ENSGALG00000003560,ENSGALG00000009003,ENSGALG00000015055,ENSGALG00000000364,ENSGALG00000004285,ENSGALG00000011673,ENSGALG00000007305,ENSGALG00000002015,ENSGALG00000013616,ENSGALG00000023521,…
GO:0044425	membrane part	cellular_component	4.1614e-06	0.0026546	150	361	4629	15035	ENSGALG00000030372,ENSGALG00000041932,ENSGALG00000026492,ENSGALG00000053549,ENSGALG00000027407,ENSGALG00000023521,ENSGALG00000023355,ENSGALG00000016296,ENSGALG00000008032,ENSGALG00000016699,ENSGALG00000034150,ENSGALG00000010331,ENSGALG00000024056,ENSGALG00000029298,ENSGALG00000011214,ENSGALG00000016480,ENSGALG00000010865,ENSGALG00000014716,ENSGALG00000032320,ENSGALG00000037285,ENSGALG00000036925,…
GO:0005326	neurotransmitter transporter activity	molecular_function	5.1456e-06	0.0030862	8	361	42	15035	ENSGALG00000016804,ENSGALG00000015332,ENSGALG00000017216,ENSGALG00000015439,ENSGALG00000041122,ENSGALG00000001693,ENSGALG00000009289,ENSGALG00000003560
GO:1903530	regulation of secretion by cell	biological_process	5.1502e-06	0.0030862	25	361	384	15035	ENSGALG00000016480,ENSGALG00000010820,ENSGALG00000014726,ENSGALG00000012456,ENSGALG00000023521,ENSGALG00000012894,ENSGALG00000038241,ENSGALG00000011104,ENSGALG00000010179,ENSGALG00000004917,ENSGALG00000042626,ENSGALG00000002015,ENSGALG00000013616,ENSGALG00000009725,ENSGALG00000048923,ENSGALG00000007047,ENSGALG00000004285,ENSGALG00000041640,ENSGALG00000015332,ENSGALG00000038364,ENSGALG00000028770,…
GO:0050793	regulation of developmental process	biological_process	5.7335e-06	0.0033347	64	361	1548	15035	ENSGALG00000040276,ENSGALG00000019312,ENSGALG00000042308,ENSGALG00000002893,ENSGALG00000003670,ENSGALG00000015150,ENSGALG00000053549,ENSGALG00000006992,ENSGALG00000008306,ENSGALG00000031997,ENSGALG00000041640,ENSGALG00000006821,ENSGALG00000002987,ENSGALG00000031112,ENSGALG00000039209,ENSGALG00000006453,ENSGALG00000014716,ENSGALG00000009488,ENSGALG00000043064,ENSGALG00000008177,ENSGALG00000010331,…
GO:0023061	signal release	biological_process	5.9212e-06	0.0033455	20	361	268	15035	ENSGALG00000009725,ENSGALG00000004285,ENSGALG00000007047,ENSGALG00000011673,ENSGALG00000015332,ENSGALG00000036497,ENSGALG00000038364,ENSGALG00000028770,ENSGALG00000003560,ENSGALG00000009003,ENSGALG00000023521,ENSGALG00000012894,ENSGALG00000010820,ENSGALG00000038241,ENSGALG00000011104,ENSGALG00000010179,ENSGALG00000004917,ENSGALG00000042626,ENSGALG00000002015,ENSGALG00000013616
GO:0044420	extracellular matrix component	cellular_component	6.4205e-06	0.0035268	7	361	32	15035	ENSGALG00000005180,ENSGALG00000004526,ENSGALG00000014686,ENSGALG00000009641,ENSGALG00000031112,ENSGALG00000036798,ENSGALG00000041555
GO:0010647	positive regulation of cell communication	biological_process	7.2253e-06	0.0038616	47	361	1011	15035	ENSGALG00000004593,ENSGALG00000010331,ENSGALG00000004917,ENSGALG00000008177,ENSGALG00000014786,ENSGALG00000012801,ENSGALG00000038241,ENSGALG00000006453,ENSGALG00000014716,ENSGALG00000000168,ENSGALG00000003003,ENSGALG00000041555,ENSGALG00000011347,ENSGALG00000009626,ENSGALG00000009003,ENSGALG00000049157,ENSGALG00000003560,ENSGALG00000047554,ENSGALG00000040672,ENSGALG00000036497,ENSGALG00000004526,…
GO:0051240	positive regulation of multicellular organismal process	biological_process	8.8151e-06	0.0044414	46	361	990	15035	ENSGALG00000015028,ENSGALG00000014908,ENSGALG00000033520,ENSGALG00000004526,ENSGALG00000013956,ENSGALG00000009626,ENSGALG00000011347,ENSGALG00000041555,ENSGALG00000047554,ENSGALG00000000607,ENSGALG00000029836,ENSGALG00000003521,ENSGALG00000010331,ENSGALG00000040045,ENSGALG00000014786,ENSGALG00000010179,ENSGALG00000008177,ENSGALG00000042626,ENSGALG00000043064,ENSGALG00000004593,ENSGALG00000016905,…
GO:0005583	fibrillar collagen trimer	cellular_component	8.9838e-06	0.0044414	4	361	7	15035	ENSGALG00000041555,ENSGALG00000031112,ENSGALG00000005180,ENSGALG00000009641
GO:0098643	banded collagen fibril	cellular_component	8.9838e-06	0.0044414	4	361	7	15035	ENSGALG00000031112,ENSGALG00000041555,ENSGALG00000009641,ENSGALG00000005180
GO:0030545	receptor regulator activity	molecular_function	9.6755e-06	0.0046666	22	361	311	15035	XLOC_033031,ENSGALG00000033974,ENSGALG00000006552,ENSGALG00000007047,ENSGALG00000054770,ENSGALG00000000364,ENSGALG00000049551,ENSGALG00000047554,ENSGALG00000054196,ENSGALG00000014908,ENSGALG00000028770,ENSGALG00000015028,ENSGALG00000010915,ENSGALG00000011104,ENSGALG00000038241,ENSGALG00000036346,ENSGALG00000003003,ENSGALG00000029819,ENSGALG00000003034,ENSGALG00000002893,ENSGALG00000009179,ENSGALG…
GO:0007267	cell-cell signaling	biological_process	1.0335e-05	0.0048659	42	361	882	15035	ENSGALG00000013616,ENSGALG00000002015,ENSGALG00000000909,ENSGALG00000001716,ENSGALG00000003005,ENSGALG00000011104,ENSGALG00000023521,ENSGALG00000042308,ENSGALG00000026903,ENSGALG00000016804,ENSGALG00000038364,ENSGALG00000028770,ENSGALG00000041122,ENSGALG00000015332,ENSGALG00000033974,ENSGALG00000031997,ENSGALG00000007047,ENSGALG00000003014,ENSGALG00000009725,ENSGALG00000042626,ENSGALG00000004593,…
GO:0048018	receptor ligand activity	molecular_function	1.0975e-05	0.0050474	21	361	290	15035	ENSGALG00000009179,ENSGALG00000026098,ENSGALG00000003003,ENSGALG00000029819,ENSGALG00000003034,ENSGALG00000002893,ENSGALG00000011104,ENSGALG00000038241,ENSGALG00000036346,ENSGALG00000015028,ENSGALG00000028770,ENSGALG00000010915,ENSGALG00000047554,ENSGALG00000054196,ENSGALG00000007047,ENSGALG00000054770,ENSGALG00000000364,ENSGALG00000049551,XLOC_033031,ENSGALG00000033974,ENSGALG00000006552
GO:0005509	calcium ion binding	molecular_function	1.1802e-05	0.0053043	30	361	537	15035	ENSGALG00000037669,ENSGALG00000012092,ENSGALG00000016908,ENSGALG00000014686,ENSGALG00000052653,ENSGALG00000011740,ENSGALG00000016464,ENSGALG00000029917,ENSGALG00000043555,ENSGALG00000009626,ENSGALG00000011347,ENSGALG00000025764,ENSGALG00000015721,ENSGALG00000011200,ENSGALG00000042079,ENSGALG00000038405,ENSGALG00000001793,ENSGALG00000004184,ENSGALG00000015624,ENSGALG00000026903,ENSGALG00000011181,…
GO:0023051	regulation of signaling	biological_process	1.39e-05	0.0059664	78	361	2064	15035	ENSGALG00000015495,ENSGALG00000043555,ENSGALG00000002766,ENSGALG00000054196,ENSGALG00000038364,ENSGALG00000033974,ENSGALG00000007047,ENSGALG00000014686,ENSGALG00000036001,ENSGALG00000027786,ENSGALG00000009179,ENSGALG00000013616,ENSGALG00000002015,ENSGALG00000000909,ENSGALG00000043662,ENSGALG00000036142,ENSGALG00000003005,ENSGALG00000011104,ENSGALG00000039264,ENSGALG00000003547,ENSGALG00000026903,…
GO:0051049	regulation of transport	biological_process	1.4004e-05	0.0059664	46	361	1011	15035	ENSGALG00000031997,ENSGALG00000041640,ENSGALG00000007047,ENSGALG00000048923,ENSGALG00000009725,ENSGALG00000006992,ENSGALG00000002503,ENSGALG00000015332,ENSGALG00000016785,ENSGALG00000004833,ENSGALG00000038364,ENSGALG00000028770,ENSGALG00000006413,ENSGALG00000023521,ENSGALG00000002893,ENSGALG00000014726,ENSGALG00000012456,ENSGALG00000011104,ENSGALG00000003589,ENSGALG00000005502,ENSGALG00000013616,…
GO:0045595	regulation of cell differentiation	biological_process	1.4462e-05	0.0059664	47	361	1044	15035	ENSGALG00000030140,ENSGALG00000016905,ENSGALG00000010386,ENSGALG00000043064,ENSGALG00000042626,ENSGALG00000010331,ENSGALG00000008177,ENSGALG00000010179,ENSGALG00000014786,ENSGALG00000006453,ENSGALG00000014716,ENSGALG00000041555,ENSGALG00000013956,ENSGALG00000009003,ENSGALG00000011347,ENSGALG00000047554,ENSGALG00000033520,ENSGALG00000004526,ENSGALG00000008614,ENSGALG00000000653,ENSGALG00000000607,…
GO:0010817	regulation of hormone levels	biological_process	1.4482e-05	0.0059664	20	361	282	15035	ENSGALG00000004285,ENSGALG00000007047,ENSGALG00000009725,ENSGALG00000015332,ENSGALG00000031343,ENSGALG00000038364,ENSGALG00000028770,ENSGALG00000036497,ENSGALG00000033256,ENSGALG00000003560,ENSGALG00000010820,ENSGALG00000023521,ENSGALG00000016804,ENSGALG00000002893,ENSGALG00000011104,ENSGALG00000038241,ENSGALG00000017216,ENSGALG00000004917,ENSGALG00000014944,ENSGALG00000010179
GO:0051673	membrane disruption in other organism	biological_process	1.5796e-05	0.0063349	3	361	3	15035	ENSGALG00000006453,ENSGALG00000027973,ENSGALG00000034150
GO:0009605	response to external stimulus	biological_process	1.6312e-05	0.0063349	52	361	1199	15035	ENSGALG00000038364,ENSGALG00000028770,ENSGALG00000016785,ENSGALG00000016296,ENSGALG00000043555,ENSGALG00000002987,ENSGALG00000054196,ENSGALG00000016699,ENSGALG00000034150,ENSGALG00000033974,ENSGALG00000008306,ENSGALG00000008945,ENSGALG00000042241,ENSGALG00000012396,ENSGALG00000053549,ENSGALG00000037522,ENSGALG00000028871,ENSGALG00000027786,ENSGALG00000013616,ENSGALG00000016128,ENSGALG00000012456,…
GO:0010646	regulation of cell communication	biological_process	1.6338e-05	0.0063349	77	361	2040	15035	ENSGALG00000011347,ENSGALG00000009626,ENSGALG00000041555,ENSGALG00000003560,ENSGALG00000047554,ENSGALG00000000653,ENSGALG00000004285,ENSGALG00000000607,ENSGALG00000010331,ENSGALG00000040045,ENSGALG00000012801,ENSGALG00000008177,ENSGALG00000004917,ENSGALG00000038241,ENSGALG00000006453,ENSGALG00000014716,ENSGALG00000000168,ENSGALG00000010820,ENSGALG00000002987,ENSGALG00000032415,ENSGALG00000028770,…
GO:0006954	inflammatory response	biological_process	1.7744e-05	0.0067479	20	361	283	15035	ENSGALG00000026098,ENSGALG00000043064,ENSGALG00000036142,ENSGALG00000027786,ENSGALG00000037522,ENSGALG00000032348,ENSGALG00000053549,ENSGALG00000012481,ENSGALG00000000168,ENSGALG00000039461,ENSGALG00000003003,ENSGALG00000054196,ENSGALG00000009626,ENSGALG00000016785,ENSGALG00000010915,ENSGALG00000015833,ENSGALG00000038364,ENSGALG00000012396,ENSGALG00000033974,ENSGALG00000049551
GO:0060348	bone development	biological_process	1.8245e-05	0.0068076	14	361	154	15035	ENSGALG00000040432,ENSGALG00000040276,ENSGALG00000023542,ENSGALG00000006453,ENSGALG00000004184,ENSGALG00000031997,ENSGALG00000041640,ENSGALG00000032031,ENSGALG00000000364,ENSGALG00000004593,ENSGALG00000011214,ENSGALG00000041555,ENSGALG00000011347,ENSGALG00000004833
GO:0023052	signaling	biological_process	2.0095e-05	0.0069818	128	361	3905	15035	ENSGALG00000016699,ENSGALG00000051882,ENSGALG00000006992,ENSGALG00000028770,ENSGALG00000016296,ENSGALG00000008032,ENSGALG00000002987,ENSGALG00000002893,ENSGALG00000023521,ENSGALG00000036346,ENSGALG00000040276,ENSGALG00000027053,ENSGALG00000012321,ENSGALG00000053549,ENSGALG00000015150,ENSGALG00000027407,ENSGALG00000004285,ENSGALG00000029836,ENSGALG00000009626,ENSGALG00000047554,ENSGALG00000003560,…
GO:0032963	collagen metabolic process	biological_process	2.0102e-05	0.0069818	8	361	49	15035	ENSGALG00000011347,ENSGALG00000041555,ENSGALG00000011214,ENSGALG00000002987,ENSGALG00000004833,ENSGALG00000005968,ENSGALG00000006992,ENSGALG00000032031
GO:0035988	chondrocyte proliferation	biological_process	2.0111e-05	0.0069818	5	361	15	15035	ENSGALG00000006453,ENSGALG00000011347,ENSGALG00000032031,ENSGALG00000000364,ENSGALG00000038364
GO:0007154	cell communication	biological_process	2.0134e-05	0.0069818	129	361	3941	15035	ENSGALG00000002766,ENSGALG00000034337,ENSGALG00000016785,ENSGALG00000038364,ENSGALG00000036798,ENSGALG00000039264,ENSGALG00000026903,ENSGALG00000014726,ENSGALG00000013616,ENSGALG00000043662,ENSGALG00000009179,ENSGALG00000028871,ENSGALG00000027786,ENSGALG00000049551,ENSGALG00000000364,ENSGALG00000049157,ENSGALG00000009003,ENSGALG00000021303,ENSGALG00000036497,ENSGALG00000004526,ENSGALG00000038405,…
GO:0046883	regulation of hormone secretion	biological_process	2.0477e-05	0.0069818	13	361	135	15035	ENSGALG00000038364,ENSGALG00000028770,ENSGALG00000010179,ENSGALG00000004917,ENSGALG00000036497,ENSGALG00000003560,ENSGALG00000009725,ENSGALG00000004285,ENSGALG00000010820,ENSGALG00000007047,ENSGALG00000023521,ENSGALG00000038241,ENSGALG00000011104
GO:0015844	monoamine transport	biological_process	2.8941e-05	0.0097	8	361	52	15035	ENSGALG00000001693,ENSGALG00000009289,ENSGALG00000042626,ENSGALG00000003560,ENSGALG00000002015,ENSGALG00000008177,ENSGALG00000038241,ENSGALG00000010820
GO:0050896	response to stimulus	biological_process	3.1213e-05	0.010287	164	361	5330	15035	ENSGALG00000027786,ENSGALG00000009179,ENSGALG00000028871,ENSGALG00000013616,ENSGALG00000043662,ENSGALG00000039264,ENSGALG00000027973,ENSGALG00000004184,ENSGALG00000036798,ENSGALG00000014726,ENSGALG00000016128,ENSGALG00000002766,ENSGALG00000039690,ENSGALG00000038364,ENSGALG00000034337,ENSGALG00000016785,ENSGALG00000053747,ENSGALG00000004593,ENSGALG00000042626,ENSGALG00000008178,ENSGALG00000036189,…
GO:0009653	anatomical structure morphogenesis	biological_process	3.9529e-05	0.012814	65	361	1682	15035	ENSGALG00000043754,ENSGALG00000033520,ENSGALG00000047554,ENSGALG00000041555,ENSGALG00000011347,ENSGALG00000009626,ENSGALG00000028721,ENSGALG00000004285,ENSGALG00000000653,ENSGALG00000023542,ENSGALG00000029836,ENSGALG00000008614,ENSGALG00000014944,ENSGALG00000026098,ENSGALG00000011214,ENSGALG00000007620,ENSGALG00000032320,ENSGALG00000006453,ENSGALG00000015253,ENSGALG00000002987,ENSGALG00000031112,…
GO:0048646	anatomical structure formation involved in morphogenesis	biological_process	4.0618e-05	0.012922	34	361	688	15035	ENSGALG00000003589,ENSGALG00000004184,ENSGALG00000036798,ENSGALG00000015908,ENSGALG00000042308,ENSGALG00000003670,ENSGALG00000037522,ENSGALG00000053549,ENSGALG00000006775,ENSGALG00000006992,ENSGALG00000006821,ENSGALG00000014686,ENSGALG00000041640,ENSGALG00000031112,ENSGALG00000011200,ENSGALG00000038364,ENSGALG00000015253,ENSGALG00000001191,ENSGALG00000032320,ENSGALG00000029819,ENSGALG00000011086,…
GO:0030534	adult behavior	biological_process	4.1169e-05	0.012922	11	361	107	15035	ENSGALG00000003005,ENSGALG00000040045,ENSGALG00000002015,ENSGALG00000032415,ENSGALG00000013616,ENSGALG00000016905,ENSGALG00000000653,ENSGALG00000003014,ENSGALG00000040905,ENSGALG00000038241,ENSGALG00000042241
GO:0048870	cell motility	biological_process	4.5583e-05	0.013868	43	361	964	15035	ENSGALG00000027973,ENSGALG00000003589,ENSGALG00000004184,ENSGALG00000012456,ENSGALG00000042308,ENSGALG00000023521,ENSGALG00000003034,ENSGALG00000016713,ENSGALG00000034975,ENSGALG00000040136,ENSGALG00000053549,ENSGALG00000033974,ENSGALG00000006992,ENSGALG00000008945,ENSGALG00000041640,ENSGALG00000006413,ENSGALG00000054196,ENSGALG00000038364,ENSGALG00000032320,ENSGALG00000000168,ENSGALG00000010820,…
GO:0051674	localization of cell	biological_process	4.5583e-05	0.013868	43	361	964	15035	ENSGALG00000040136,ENSGALG00000053549,ENSGALG00000034975,ENSGALG00000027973,ENSGALG00000003589,ENSGALG00000004184,ENSGALG00000023521,ENSGALG00000042308,ENSGALG00000003034,ENSGALG00000016713,ENSGALG00000012456,ENSGALG00000054196,ENSGALG00000006413,ENSGALG00000038364,ENSGALG00000006992,ENSGALG00000008945,ENSGALG00000033974,ENSGALG00000041640,ENSGALG00000026098,ENSGALG00000036189,ENSGALG00000010179,…
GO:0097529	myeloid leukocyte migration	biological_process	4.9636e-05	0.014872	11	361	106	15035	ENSGALG00000027973,ENSGALG00000049551,ENSGALG00000016713,ENSGALG00000012456,ENSGALG00000010820,ENSGALG00000003003,ENSGALG00000029819,ENSGALG00000026098,ENSGALG00000054196,ENSGALG00000053549,ENSGALG00000038364
GO:0015220	choline transmembrane transporter activity	molecular_function	5.2961e-05	0.015543	3	361	4	15035	ENSGALG00000016804,ENSGALG00000015439,ENSGALG00000017216
GO:0007167	enzyme linked receptor protein signaling pathway	biological_process	5.3446e-05	0.015543	31	361	610	15035	ENSGALG00000014686,ENSGALG00000031997,ENSGALG00000007358,ENSGALG00000006821,ENSGALG00000004285,ENSGALG00000006992,ENSGALG00000029836,ENSGALG00000033974,ENSGALG00000016296,ENSGALG00000014908,ENSGALG00000040672,ENSGALG00000038364,ENSGALG00000028770,ENSGALG00000049157,ENSGALG00000047554,ENSGALG00000015495,ENSGALG00000009626,ENSGALG00000043555,ENSGALG00000005707,ENSGALG00000023521,ENSGALG00000030607,…
GO:0051239	regulation of multicellular organismal process	biological_process	5.6089e-05	0.016075	68	361	1800	15035	ENSGALG00000003521,ENSGALG00000000364,ENSGALG00000013956,ENSGALG00000009003,ENSGALG00000016945,ENSGALG00000004526,ENSGALG00000015028,ENSGALG00000014908,ENSGALG00000008660,ENSGALG00000012894,ENSGALG00000042626,ENSGALG00000004593,ENSGALG00000016905,ENSGALG00000036189,ENSGALG00000010179,ENSGALG00000014786,ENSGALG00000042241,ENSGALG00000033974,ENSGALG00000014686,ENSGALG00000011242,ENSGALG00000007047,…
GO:0051971	positive regulation of transmission of nerve impulse	biological_process	5.7357e-05	0.016123	3	361	4	15035	ENSGALG00000038241,ENSGALG00000003005,ENSGALG00000004526
GO:0019531	oxalate transmembrane transporter activity	molecular_function	5.7886e-05	0.016123	4	361	10	15035	ENSGALG00000033638,ENSGALG00000007959,ENSGALG00000027423,ENSGALG00000000745
GO:0030154	cell differentiation	biological_process	6.2042e-05	0.01704	83	361	2328	15035	ENSGALG00000010036,ENSGALG00000006821,ENSGALG00000031997,ENSGALG00000041640,ENSGALG00000008306,ENSGALG00000006992,ENSGALG00000028770,ENSGALG00000015253,ENSGALG00000039209,ENSGALG00000010915,ENSGALG00000031112,ENSGALG00000002987,ENSGALG00000012456,ENSGALG00000054783,ENSGALG00000042308,ENSGALG00000003589,ENSGALG00000019312,ENSGALG00000040276,ENSGALG00000034975,ENSGALG00000015150,ENSGALG00000053549,…
GO:0002274	myeloid leukocyte activation	biological_process	7.2607e-05	0.019669	10	361	93	15035	ENSGALG00000033520,ENSGALG00000016785,ENSGALG00000037522,ENSGALG00000009626,ENSGALG00000026098,ENSGALG00000012456,ENSGALG00000010820,ENSGALG00000054783,ENSGALG00000027973,ENSGALG00000008660
GO:0031410	cytoplasmic vesicle	cellular_component	7.7307e-05	0.020525	41	361	925	15035	ENSGALG00000006413,ENSGALG00000046616,ENSGALG00000011200,ENSGALG00000014997,ENSGALG00000041122,ENSGALG00000002503,ENSGALG00000048923,ENSGALG00000009725,ENSGALG00000043172,ENSGALG00000034150,ENSGALG00000036001,ENSGALG00000053549,ENSGALG00000027973,ENSGALG00000004184,ENSGALG00000014726,ENSGALG00000012456,ENSGALG00000054783,ENSGALG00000009626,ENSGALG00000001693,ENSGALG00000009003,ENSGALG00000030545,…
GO:0046879	hormone secretion	biological_process	7.7843e-05	0.020525	14	361	175	15035	ENSGALG00000003560,ENSGALG00000028770,ENSGALG00000038364,ENSGALG00000004917,ENSGALG00000036497,ENSGALG00000010179,ENSGALG00000015332,ENSGALG00000011104,ENSGALG00000038241,ENSGALG00000004285,ENSGALG00000010820,ENSGALG00000007047,ENSGALG00000009725,ENSGALG00000023521
GO:0098793	presynapse	cellular_component	8.1648e-05	0.021245	17	361	252	15035	ENSGALG00000009289,ENSGALG00000003560,ENSGALG00000009003,ENSGALG00000001693,ENSGALG00000014967,ENSGALG00000011673,ENSGALG00000041122,ENSGALG00000015332,ENSGALG00000004917,ENSGALG00000032958,ENSGALG00000010331,ENSGALG00000042626,ENSGALG00000026903,ENSGALG00000042308,ENSGALG00000014726,ENSGALG00000036925,ENSGALG00000039659
GO:0097708	intracellular vesicle	cellular_component	8.2851e-05	0.021278	41	361	928	15035	ENSGALG00000029298,ENSGALG00000042626,ENSGALG00000033638,ENSGALG00000015898,ENSGALG00000010331,ENSGALG00000032958,ENSGALG00000040045,ENSGALG00000008660,ENSGALG00000006453,ENSGALG00000038241,ENSGALG00000029819,ENSGALG00000010820,ENSGALG00000009289,ENSGALG00000030545,ENSGALG00000001693,ENSGALG00000009003,ENSGALG00000009626,ENSGALG00000040038,ENSGALG00000031343,ENSGALG00000033520,ENSGALG00000014967,…
GO:0044456	synapse part	cellular_component	8.4062e-05	0.021312	27	361	520	15035	ENSGALG00000000168,ENSGALG00000036925,ENSGALG00000039659,ENSGALG00000012894,ENSGALG00000042308,ENSGALG00000015089,ENSGALG00000026903,ENSGALG00000014726,ENSGALG00000041225,ENSGALG00000042626,ENSGALG00000016905,ENSGALG00000008177,ENSGALG00000004917,ENSGALG00000003005,ENSGALG00000010331,ENSGALG00000001716,ENSGALG00000032958,ENSGALG00000041122,ENSGALG00000015332,ENSGALG00000014967,ENSGALG00000000653,…
GO:0015837	amine transport	biological_process	8.6964e-05	0.021666	7	361	45	15035	ENSGALG00000010820,ENSGALG00000015055,ENSGALG00000001693,ENSGALG00000038241,ENSGALG00000009289,ENSGALG00000042626,ENSGALG00000002015
GO:0031091	platelet alpha granule	cellular_component	8.7652e-05	0.021666	4	361	11	15035	ENSGALG00000011200,ENSGALG00000009626,ENSGALG00000004184,ENSGALG00000029298
GO:0019532	oxalate transport	biological_process	9.2026e-05	0.022467	4	361	11	15035	ENSGALG00000000745,ENSGALG00000027423,ENSGALG00000007959,ENSGALG00000033638
GO:0050796	regulation of insulin secretion	biological_process	9.4231e-05	0.022624	9	361	78	15035	ENSGALG00000011104,ENSGALG00000004285,ENSGALG00000010820,ENSGALG00000023521,ENSGALG00000028770,ENSGALG00000038364,ENSGALG00000010179,ENSGALG00000004917,ENSGALG00000036497
GO:0070887	cellular response to chemical stimulus	biological_process	9.496e-05	0.022624	67	361	1780	15035	ENSGALG00000043555,ENSGALG00000054196,ENSGALG00000039690,ENSGALG00000038364,ENSGALG00000016785,ENSGALG00000008283,ENSGALG00000033974,ENSGALG00000014686,ENSGALG00000027786,ENSGALG00000036001,ENSGALG00000037522,ENSGALG00000004184,ENSGALG00000011104,ENSGALG00000027973,ENSGALG00000036798,ENSGALG00000003547,ENSGALG00000016713,ENSGALG00000018557,ENSGALG00000036497,ENSGALG00000007959,ENSGALG00000003521,…
GO:0048518	positive regulation of biological process	biological_process	0.00010133	0.023854	120	361	3724	15035	ENSGALG00000016905,ENSGALG00000004593,ENSGALG00000042626,ENSGALG00000015898,ENSGALG00000045052,ENSGALG00000030140,ENSGALG00000003106,ENSGALG00000032348,ENSGALG00000014786,ENSGALG00000010179,ENSGALG00000008660,ENSGALG00000001191,ENSGALG00000053601,ENSGALG00000003003,ENSGALG00000029819,ENSGALG00000030545,ENSGALG00000049157,ENSGALG00000013956,ENSGALG00000009003,ENSGALG00000036497,ENSGALG00000038405,…
GO:0016477	cell migration	biological_process	0.00010753	0.024776	39	361	876	15035	ENSGALG00000043754,ENSGALG00000004526,ENSGALG00000041555,ENSGALG00000009626,ENSGALG00000049551,ENSGALG00000000364,ENSGALG00000000653,ENSGALG00000003521,ENSGALG00000030822,ENSGALG00000029836,ENSGALG00000014786,ENSGALG00000036189,ENSGALG00000040045,ENSGALG00000026098,ENSGALG00000003003,ENSGALG00000010820,ENSGALG00000029819,ENSGALG00000007620,ENSGALG00000016480,ENSGALG00000000168,ENSGALG00000032320,…
GO:0048513	animal organ development	biological_process	0.00010775	0.024776	72	361	1971	15035	ENSGALG00000030607,ENSGALG00000011086,ENSGALG00000001191,ENSGALG00000010179,ENSGALG00000014786,ENSGALG00000004593,ENSGALG00000045052,ENSGALG00000000364,ENSGALG00000030822,ENSGALG00000003521,ENSGALG00000007305,ENSGALG00000006552,ENSGALG00000036497,ENSGALG00000004526,ENSGALG00000031343,ENSGALG00000014908,ENSGALG00000006343,ENSGALG00000013956,ENSGALG00000005707,ENSGALG00000032031,ENSGALG00000040432,…
GO:0090276	regulation of peptide hormone secretion	biological_process	0.00011165	0.025377	10	361	98	15035	ENSGALG00000011104,ENSGALG00000004285,ENSGALG00000010820,ENSGALG00000023521,ENSGALG00000003560,ENSGALG00000028770,ENSGALG00000038364,ENSGALG00000010179,ENSGALG00000004917,ENSGALG00000036497
GO:0050900	leukocyte migration	biological_process	0.00011524	0.025664	14	361	180	15035	ENSGALG00000029819,ENSGALG00000012456,ENSGALG00000010820,ENSGALG00000003003,ENSGALG00000016713,ENSGALG00000049551,ENSGALG00000027973,ENSGALG00000000168,ENSGALG00000038364,ENSGALG00000034975,ENSGALG00000040045,ENSGALG00000053549,ENSGALG00000054196,ENSGALG00000026098
GO:0032940	secretion by cell	biological_process	0.00011551	0.025664	28	361	549	15035	ENSGALG00000041640,ENSGALG00000048923,ENSGALG00000004285,ENSGALG00000007047,ENSGALG00000011673,ENSGALG00000009725,ENSGALG00000015332,ENSGALG00000036497,ENSGALG00000016785,ENSGALG00000004833,ENSGALG00000028770,ENSGALG00000038364,ENSGALG00000003560,ENSGALG00000033256,ENSGALG00000009003,ENSGALG00000023521,ENSGALG00000012894,ENSGALG00000010820,ENSGALG00000014726,ENSGALG00000012456,ENSGALG00000016480,…
GO:0009914	hormone transport	biological_process	0.00011843	0.026022	14	361	182	15035	ENSGALG00000010820,ENSGALG00000004285,ENSGALG00000007047,ENSGALG00000009725,ENSGALG00000023521,ENSGALG00000011104,ENSGALG00000015332,ENSGALG00000038241,ENSGALG00000038364,ENSGALG00000028770,ENSGALG00000004917,ENSGALG00000036497,ENSGALG00000010179,ENSGALG00000003560
GO:0005179	hormone activity	molecular_function	0.0001335	0.028715	9	361	77	15035	ENSGALG00000015028,ENSGALG00000028770,ENSGALG00000007047,ENSGALG00000000364,ENSGALG00000003034,ENSGALG00000002893,ENSGALG00000011104,ENSGALG00000038241,ENSGALG00000006552
GO:0008271	secondary active sulfate transmembrane transporter activity	molecular_function	0.00013359	0.028715	4	361	12	15035	ENSGALG00000000745,ENSGALG00000027423,ENSGALG00000007959,ENSGALG00000033638
GO:0042581	specific granule	cellular_component	0.00014297	0.030179	4	361	12	15035	ENSGALG00000034150,ENSGALG00000053549,ENSGALG00000027973,ENSGALG00000006453
GO:0097458	neuron part	cellular_component	0.00014375	0.030179	41	361	964	15035	ENSGALG00000006221,ENSGALG00000032958,ENSGALG00000010331,ENSGALG00000004917,ENSGALG00000008177,ENSGALG00000016905,ENSGALG00000042626,ENSGALG00000041225,ENSGALG00000029819,ENSGALG00000012894,ENSGALG00000015089,ENSGALG00000014716,ENSGALG00000000168,ENSGALG00000036925,ENSGALG00000009003,ENSGALG00000005707,ENSGALG00000001693,ENSGALG00000003560,ENSGALG00000009289,ENSGALG00000011673,ENSGALG00000000653,…
GO:0032879	regulation of localization	biological_process	0.00014603	0.030179	61	361	1619	15035	ENSGALG00000053549,ENSGALG00000005502,ENSGALG00000002015,ENSGALG00000000909,ENSGALG00000013616,ENSGALG00000012456,ENSGALG00000014726,ENSGALG00000002893,ENSGALG00000016713,ENSGALG00000023521,ENSGALG00000003034,ENSGALG00000004184,ENSGALG00000003589,ENSGALG00000011104,ENSGALG00000038364,ENSGALG00000028770,ENSGALG00000004833,ENSGALG00000016785,ENSGALG00000006413,ENSGALG00000009725,ENSGALG00000048923,…
GO:0032101	regulation of response to external stimulus	biological_process	0.00014651	0.030179	23	361	415	15035	ENSGALG00000006453,ENSGALG00000038241,ENSGALG00000011104,ENSGALG00000000168,ENSGALG00000029819,ENSGALG00000012456,ENSGALG00000016713,ENSGALG00000027786,ENSGALG00000013616,ENSGALG00000026098,ENSGALG00000012481,ENSGALG00000053549,ENSGALG00000012801,ENSGALG00000036189,ENSGALG00000037522,ENSGALG00000033974,ENSGALG00000008306,ENSGALG00000009626,ENSGALG00000002987,ENSGALG00000038364,ENSGALG00000015833,…
GO:0001505	regulation of neurotransmitter levels	biological_process	0.00015351	0.031295	14	361	190	15035	ENSGALG00000011673,ENSGALG00000016804,ENSGALG00000012894,ENSGALG00000015332,ENSGALG00000017216,ENSGALG00000008177,ENSGALG00000004917,ENSGALG00000001693,ENSGALG00000009003,ENSGALG00000042626,ENSGALG00000009289,ENSGALG00000002015,ENSGALG00000000909,ENSGALG00000003560
GO:0002790	peptide secretion	biological_process	0.00015834	0.03195	19	361	310	15035	ENSGALG00000042626,ENSGALG00000002015,ENSGALG00000013616,ENSGALG00000010179,ENSGALG00000004917,ENSGALG00000011104,ENSGALG00000023521,ENSGALG00000010820,ENSGALG00000014726,ENSGALG00000003560,ENSGALG00000033256,ENSGALG00000016785,ENSGALG00000036497,ENSGALG00000038364,ENSGALG00000028770,ENSGALG00000004833,ENSGALG00000015332,ENSGALG00000041640,ENSGALG00000004285
GO:0030595	leukocyte chemotaxis	biological_process	0.00016051	0.032061	11	361	120	15035	ENSGALG00000010820,ENSGALG00000003003,ENSGALG00000012456,ENSGALG00000029819,ENSGALG00000049551,ENSGALG00000016713,ENSGALG00000027973,ENSGALG00000038364,ENSGALG00000053549,ENSGALG00000026098,ENSGALG00000054196
GO:0048869	cellular developmental process	biological_process	0.00016763	0.032803	85	361	2469	15035	ENSGALG00000038364,ENSGALG00000015495,ENSGALG00000043555,ENSGALG00000039690,ENSGALG00000007047,ENSGALG00000026137,ENSGALG00000011242,ENSGALG00000014686,ENSGALG00000033974,ENSGALG00000005968,ENSGALG00000042241,ENSGALG00000037522,ENSGALG00000027786,ENSGALG00000013616,ENSGALG00000036142,ENSGALG00000000909,ENSGALG00000015908,ENSGALG00000034831,ENSGALG00000039264,ENSGALG00000004184,ENSGALG00000014908,…
GO:0009306	protein secretion	biological_process	0.00016897	0.032803	18	361	286	15035	ENSGALG00000038364,ENSGALG00000028770,ENSGALG00000004833,ENSGALG00000016785,ENSGALG00000036497,ENSGALG00000033256,ENSGALG00000004285,ENSGALG00000041640,ENSGALG00000015332,ENSGALG00000010179,ENSGALG00000004917,ENSGALG00000002015,ENSGALG00000042626,ENSGALG00000013616,ENSGALG00000010820,ENSGALG00000014726,ENSGALG00000023521,ENSGALG00000011104
GO:0022610	biological adhesion	biological_process	0.0001692	0.032803	35	361	780	15035	ENSGALG00000003589,ENSGALG00000015624,ENSGALG00000012456,ENSGALG00000036142,ENSGALG00000030372,ENSGALG00000053549,ENSGALG00000006775,ENSGALG00000040857,ENSGALG00000008306,ENSGALG00000016908,ENSGALG00000026137,ENSGALG00000051882,ENSGALG00000000299,ENSGALG00000052653,ENSGALG00000043555,ENSGALG00000038364,ENSGALG00000015253,ENSGALG00000011200,ENSGALG00000042079,ENSGALG00000014716,ENSGALG00000006453,…
GO:0030073	insulin secretion	biological_process	0.00017948	0.034458	10	361	104	15035	ENSGALG00000011104,ENSGALG00000015332,ENSGALG00000010820,ENSGALG00000004285,ENSGALG00000023521,ENSGALG00000038364,ENSGALG00000028770,ENSGALG00000010179,ENSGALG00000004917,ENSGALG00000036497
GO:0040011	locomotion	biological_process	0.00018879	0.035897	45	361	1093	15035	ENSGALG00000041640,ENSGALG00000042241,ENSGALG00000008945,ENSGALG00000006992,ENSGALG00000033974,ENSGALG00000038364,ENSGALG00000054196,ENSGALG00000006413,ENSGALG00000016713,ENSGALG00000003034,ENSGALG00000042308,ENSGALG00000023521,ENSGALG00000012456,ENSGALG00000004184,ENSGALG00000027973,ENSGALG00000003589,ENSGALG00000053549,ENSGALG00000040136,ENSGALG00000034975,ENSGALG00000049551,ENSGALG00000000653,…
GO:0002548	monocyte chemotaxis	biological_process	0.00019194	0.036148	6	361	35	15035	ENSGALG00000054196,ENSGALG00000026098,ENSGALG00000016713,ENSGALG00000049551,ENSGALG00000038364,ENSGALG00000003003
GO:0004222	metalloendopeptidase activity	molecular_function	0.00019701	0.036753	9	361	86	15035	ENSGALG00000005968,ENSGALG00000006992,ENSGALG00000032031,ENSGALG00000001115,ENSGALG00000001407,ENSGALG00000010331,ENSGALG00000031343,ENSGALG00000032974,ENSGALG00000053549
GO:0042493	response to drug	biological_process	0.00021662	0.03994	24	361	452	15035	ENSGALG00000029836,ENSGALG00000033974,ENSGALG00000041122,ENSGALG00000012396,ENSGALG00000007047,ENSGALG00000003014,ENSGALG00000001559,ENSGALG00000000607,ENSGALG00000012613,ENSGALG00000009626,ENSGALG00000009289,ENSGALG00000003560,ENSGALG00000008283,ENSGALG00000040541,ENSGALG00000012894,ENSGALG00000028871,ENSGALG00000013616,ENSGALG00000002015,ENSGALG00000042626,ENSGALG00000043064,ENSGALG00000040045,…
GO:0048584	positive regulation of response to stimulus	biological_process	0.00021813	0.03994	50	361	1257	15035	ENSGALG00000003547,ENSGALG00000011104,ENSGALG00000039264,ENSGALG00000023521,ENSGALG00000016713,ENSGALG00000012456,ENSGALG00000013616,ENSGALG00000043662,ENSGALG00000036142,ENSGALG00000000731,ENSGALG00000009179,ENSGALG00000053549,ENSGALG00000012321,ENSGALG00000006992,ENSGALG00000033974,ENSGALG00000031997,ENSGALG00000007047,ENSGALG00000026137,ENSGALG00000002766,ENSGALG00000054196,ENSGALG00000002987,…
GO:2000026	regulation of multicellular organismal development	biological_process	0.00022563	0.040738	48	361	1202	15035	ENSGALG00000041555,ENSGALG00000016945,ENSGALG00000013956,ENSGALG00000009626,ENSGALG00000011347,ENSGALG00000009003,ENSGALG00000047554,ENSGALG00000033520,ENSGALG00000014908,ENSGALG00000043754,ENSGALG00000004526,ENSGALG00000008614,ENSGALG00000004285,ENSGALG00000000653,ENSGALG00000000607,ENSGALG00000016905,ENSGALG00000042626,ENSGALG00000004593,ENSGALG00000043064,ENSGALG00000010331,ENSGALG00000008177,…
GO:0031982	vesicle	cellular_component	0.00022661	0.040738	42	361	1005	15035	ENSGALG00000046616,ENSGALG00000006413,ENSGALG00000014997,ENSGALG00000011200,ENSGALG00000002503,ENSGALG00000041122,ENSGALG00000043172,ENSGALG00000034150,ENSGALG00000009725,ENSGALG00000048923,ENSGALG00000036001,ENSGALG00000053549,ENSGALG00000004184,ENSGALG00000027973,ENSGALG00000054783,ENSGALG00000012456,ENSGALG00000014726,ENSGALG00000009289,ENSGALG00000030545,ENSGALG00000001693,ENSGALG00000009626,…
GO:0003014	renal system process	biological_process	0.00023179	0.041293	7	361	53	15035	ENSGALG00000002987,ENSGALG00000000168,ENSGALG00000004593,ENSGALG00000033256,ENSGALG00000000364,ENSGALG00000003005,ENSGALG00000003014
GO:0005539	glycosaminoglycan binding	molecular_function	0.00023673	0.041798	10	361	108	15035	ENSGALG00000004593,ENSGALG00000006413,ENSGALG00000009626,ENSGALG00000009601,ENSGALG00000038364,ENSGALG00000012481,ENSGALG00000015624,ENSGALG00000006453,ENSGALG00000001407,ENSGALG00000009856
GO:0032102	negative regulation of response to external stimulus	biological_process	0.00023947	0.041907	14	361	196	15035	ENSGALG00000000168,ENSGALG00000006453,ENSGALG00000033974,ENSGALG00000038241,ENSGALG00000011104,ENSGALG00000008306,ENSGALG00000004526,ENSGALG00000036189,ENSGALG00000038364,ENSGALG00000012481,ENSGALG00000015833,ENSGALG00000002987,ENSGALG00000027786,ENSGALG00000009626
GO:0015871	choline transport	biological_process	0.00024497	0.042493	3	361	6	15035	ENSGALG00000017216,ENSGALG00000015439,ENSGALG00000016804
GO:0098700	neurotransmitter loading into synaptic vesicle	biological_process	0.00025348	0.043431	3	361	6	15035	ENSGALG00000041122,ENSGALG00000009289,ENSGALG00000001693
GO:0043271	negative regulation of ion transport	biological_process	0.00025477	0.043431	8	361	70	15035	ENSGALG00000008177,ENSGALG00000032506,ENSGALG00000009626,ENSGALG00000041640,ENSGALG00000031997,ENSGALG00000000364,ENSGALG00000048923,ENSGALG00000006992
GO:0008504	monoamine transmembrane transporter activity	molecular_function	0.00026276	0.044219	3	361	6	15035	ENSGALG00000003560,ENSGALG00000009289,ENSGALG00000001693
GO:0015116	sulfate transmembrane transporter activity	molecular_function	0.00026729	0.044219	4	361	14	15035	ENSGALG00000033638,ENSGALG00000007959,ENSGALG00000027423,ENSGALG00000000745
GO:1902358	sulfate transmembrane transport	biological_process	0.00026729	0.044219	4	361	14	15035	ENSGALG00000033638,ENSGALG00000007959,ENSGALG00000027423,ENSGALG00000000745
GO:0060350	endochondral bone morphogenesis	biological_process	0.00026833	0.044219	7	361	54	15035	ENSGALG00000041555,ENSGALG00000011347,ENSGALG00000040276,ENSGALG00000023542,ENSGALG00000011214,ENSGALG00000032031,ENSGALG00000000364
GO:0070382	exocytic vesicle	cellular_component	0.00027482	0.044914	10	361	111	15035	ENSGALG00000010331,ENSGALG00000032958,ENSGALG00000001693,ENSGALG00000009003,ENSGALG00000009289,ENSGALG00000042626,ENSGALG00000014726,ENSGALG00000011673,ENSGALG00000014967,ENSGALG00000041122
GO:0007166	cell surface receptor signaling pathway	biological_process	0.00027902	0.045227	60	361	1616	15035	ENSGALG00000000168,ENSGALG00000014716,ENSGALG00000006453,ENSGALG00000030607,ENSGALG00000053601,ENSGALG00000003003,ENSGALG00000016480,ENSGALG00000029819,ENSGALG00000010386,ENSGALG00000026098,ENSGALG00000004593,ENSGALG00000030140,ENSGALG00000032348,ENSGALG00000012801,ENSGALG00000036189,ENSGALG00000014786,ENSGALG00000017050,ENSGALG00000040045,ENSGALG00000029836,ENSGALG00000049551,ENSGALG00000000607,…
GO:0015370	solute:sodium symporter activity	molecular_function	0.00028295	0.045491	7	361	55	15035	ENSGALG00000001693,ENSGALG00000003560,ENSGALG00000009289,ENSGALG00000017216,ENSGALG00000040541,ENSGALG00000016804,ENSGALG00000041932
GO:0097530	granulocyte migration	biological_process	0.0002934	0.046533	8	361	70	15035	ENSGALG00000026098,ENSGALG00000054196,ENSGALG00000053549,ENSGALG00000027973,ENSGALG00000049551,ENSGALG00000003003,ENSGALG00000012456,ENSGALG00000029819
GO:0003008	system process	biological_process	0.00029419	0.046533	42	361	1013	15035	ENSGALG00000011040,ENSGALG00000030822,ENSGALG00000003521,ENSGALG00000000607,ENSGALG00000028721,ENSGALG00000000364,ENSGALG00000000653,ENSGALG00000005707,ENSGALG00000009003,ENSGALG00000041555,ENSGALG00000004526,ENSGALG00000006343,ENSGALG00000015028,ENSGALG00000052981,ENSGALG00000031343,ENSGALG00000008660,ENSGALG00000000168,ENSGALG00000038241,ENSGALG00000012894,ENSGALG00000010820,ENSGALG00000029298,…
GO:0051093	negative regulation of developmental process	biological_process	0.0002965	0.046533	28	361	578	15035	ENSGALG00000005968,ENSGALG00000033974,ENSGALG00000008306,ENSGALG00000006992,ENSGALG00000000653,ENSGALG00000007047,ENSGALG00000006821,ENSGALG00000000607,ENSGALG00000041640,ENSGALG00000011347,ENSGALG00000009626,ENSGALG00000016945,ENSGALG00000031112,ENSGALG00000039690,ENSGALG00000038364,ENSGALG00000011200,ENSGALG00000004526,ENSGALG00000004184,ENSGALG00000019312,ENSGALG00000002893,ENSGALG00000042308,…
GO:0007155	cell adhesion	biological_process	0.00031684	0.049334	34	361	775	15035	ENSGALG00000012456,ENSGALG00000015624,ENSGALG00000003589,ENSGALG00000053549,ENSGALG00000006775,ENSGALG00000030372,ENSGALG00000036142,ENSGALG00000051882,ENSGALG00000000299,ENSGALG00000052653,ENSGALG00000016908,ENSGALG00000026137,ENSGALG00000040857,ENSGALG00000008306,ENSGALG00000042079,ENSGALG00000015253,ENSGALG00000038364,ENSGALG00000011200,ENSGALG00000043555,ENSGALG00000053601,ENSGALG00000041225,…
GO:0045597	positive regulation of cell differentiation	biological_process	0.00032112	0.049611	27	361	555	15035	ENSGALG00000039209,ENSGALG00000033520,ENSGALG00000047554,ENSGALG00000039690,ENSGALG00000002987,ENSGALG00000013956,ENSGALG00000043555,ENSGALG00000011347,ENSGALG00000041555,ENSGALG00000031997,ENSGALG00000011242,ENSGALG00000014686,ENSGALG00000041640,ENSGALG00000010179,ENSGALG00000053549,ENSGALG00000010331,ENSGALG00000042626,ENSGALG00000043064,ENSGALG00000000909,ENSGALG00000013616,ENSGALG00000016905,…
GO:0007626	locomotory behavior	biological_process	0.00032739	0.050187	12	361	156	15035	ENSGALG00000003163,ENSGALG00000040905,ENSGALG00000042241,ENSGALG00000000653,ENSGALG00000009003,ENSGALG00000009289,ENSGALG00000002015,ENSGALG00000032415,ENSGALG00000013616,ENSGALG00000003005,ENSGALG00000040045,ENSGALG00000004526
GO:1901700	response to oxygen-containing compound	biological_process	0.00033834	0.051467	33	361	735	15035	ENSGALG00000013616,ENSGALG00000027786,ENSGALG00000041932,ENSGALG00000037522,ENSGALG00000036798,ENSGALG00000002289,ENSGALG00000011104,ENSGALG00000023521,ENSGALG00000031112,ENSGALG00000028770,ENSGALG00000012396,ENSGALG00000006992,ENSGALG00000033974,ENSGALG00000043064,ENSGALG00000026098,ENSGALG00000012801,ENSGALG00000014786,ENSGALG00000008177,ENSGALG00000040045,ENSGALG00000006453,ENSGALG00000012894,…
GO:0060326	cell chemotaxis	biological_process	0.00034826	0.051844	13	361	175	15035	ENSGALG00000009626,ENSGALG00000054196,ENSGALG00000026098,ENSGALG00000038364,ENSGALG00000053549,ENSGALG00000033974,ENSGALG00000027973,ENSGALG00000029819,ENSGALG00000010820,ENSGALG00000012456,ENSGALG00000003003,ENSGALG00000016713,ENSGALG00000049551
GO:0001504	neurotransmitter uptake	biological_process	0.00034834	0.051844	5	361	27	15035	ENSGALG00000008177,ENSGALG00000001693,ENSGALG00000009289,ENSGALG00000000909,ENSGALG00000003560
GO:0030072	peptide hormone secretion	biological_process	0.00034869	0.051844	11	361	134	15035	ENSGALG00000028770,ENSGALG00000038364,ENSGALG00000010179,ENSGALG00000036497,ENSGALG00000004917,ENSGALG00000003560,ENSGALG00000010820,ENSGALG00000004285,ENSGALG00000023521,ENSGALG00000011104,ENSGALG00000015332
GO:0008272	sulfate transport	biological_process	0.00036112	0.053082	4	361	15	15035	ENSGALG00000027423,ENSGALG00000000745,ENSGALG00000033638,ENSGALG00000007959
GO:0005328	neurotransmitter:sodium symporter activity	molecular_function	0.00036238	0.053082	5	361	27	15035	ENSGALG00000016804,ENSGALG00000001693,ENSGALG00000017216,ENSGALG00000009289,ENSGALG00000003560
GO:0016485	protein processing	biological_process	0.00036856	0.05359	11	361	135	15035	ENSGALG00000000653,ENSGALG00000009725,ENSGALG00000032031,ENSGALG00000008660,ENSGALG00000005086,ENSGALG00000010331,ENSGALG00000031343,ENSGALG00000032974,ENSGALG00000002987,ENSGALG00000009626,ENSGALG00000033256
GO:0002791	regulation of peptide secretion	biological_process	0.00037468	0.053624	15	361	228	15035	ENSGALG00000042626,ENSGALG00000003560,ENSGALG00000013616,ENSGALG00000010179,ENSGALG00000016785,ENSGALG00000004917,ENSGALG00000036497,ENSGALG00000028770,ENSGALG00000038364,ENSGALG00000004833,ENSGALG00000011104,ENSGALG00000023521,ENSGALG00000041640,ENSGALG00000010820,ENSGALG00000004285
GO:0099537	trans-synaptic signaling	biological_process	0.00037481	0.053624	22	361	421	15035	ENSGALG00000001716,ENSGALG00000003005,ENSGALG00000010331,ENSGALG00000008177,ENSGALG00000004917,ENSGALG00000000909,ENSGALG00000042626,ENSGALG00000002015,ENSGALG00000041225,ENSGALG00000026903,ENSGALG00000012894,ENSGALG00000016804,ENSGALG00000000168,ENSGALG00000004526,ENSGALG00000009003,ENSGALG00000003560,ENSGALG00000011673,ENSGALG00000003014,ENSGALG00000000653,ENSGALG00000014967,ENSGALG00000015332,…
GO:0008021	synaptic vesicle	cellular_component	0.00037693	0.053624	9	361	95	15035	ENSGALG00000009003,ENSGALG00000001693,ENSGALG00000009289,ENSGALG00000010331,ENSGALG00000032958,ENSGALG00000041122,ENSGALG00000011673,ENSGALG00000014726,ENSGALG00000014967
GO:0005102	signaling receptor binding	molecular_function	0.00040394	0.057019	39	361	924	15035	ENSGALG00000003163,ENSGALG00000011104,ENSGALG00000003589,ENSGALG00000036346,ENSGALG00000002893,ENSGALG00000003034,ENSGALG00000023521,ENSGALG00000009179,ENSGALG00000038645,ENSGALG00000033974,ENSGALG00000054770,ENSGALG00000007047,ENSGALG00000051882,ENSGALG00000043555,ENSGALG00000054196,ENSGALG00000038364,ENSGALG00000028770,ENSGALG00000016296,ENSGALG00000010915,ENSGALG00000039209,ENSGALG00000038241,…
GO:0043410	positive regulation of MAPK cascade	biological_process	0.00040655	0.057019	18	361	307	15035	ENSGALG00000040672,ENSGALG00000016296,ENSGALG00000009626,ENSGALG00000043555,ENSGALG00000002766,ENSGALG00000054196,ENSGALG00000049157,ENSGALG00000002987,ENSGALG00000049551,ENSGALG00000000607,ENSGALG00000033974,ENSGALG00000012321,ENSGALG00000053549,ENSGALG00000043662,ENSGALG00000003003,ENSGALG00000023521,ENSGALG00000011104,ENSGALG00000038241
GO:0008283	cell proliferation	biological_process	0.00041253	0.057341	44	361	1093	15035	ENSGALG00000038364,ENSGALG00000015253,ENSGALG00000002987,ENSGALG00000015495,ENSGALG00000031997,ENSGALG00000041640,ENSGALG00000026137,ENSGALG00000054770,ENSGALG00000010036,ENSGALG00000006821,ENSGALG00000006992,ENSGALG00000012396,ENSGALG00000033974,ENSGALG00000000909,ENSGALG00000042308,ENSGALG00000054783,ENSGALG00000012456,ENSGALG00000032031,ENSGALG00000040276,ENSGALG00000004184,ENSGALG00000003589,…
GO:0015291	secondary active transmembrane transporter activity	molecular_function	0.00041466	0.057341	12	361	160	15035	ENSGALG00000016804,ENSGALG00000000745,ENSGALG00000040541,ENSGALG00000007959,ENSGALG00000017216,ENSGALG00000041932,ENSGALG00000027423,ENSGALG00000003560,ENSGALG00000009289,ENSGALG00000030545,ENSGALG00000033638,ENSGALG00000001693
GO:0099536	synaptic signaling	biological_process	0.0004276	0.058659	22	361	425	15035	ENSGALG00000014967,ENSGALG00000003014,ENSGALG00000011673,ENSGALG00000000653,ENSGALG00000041122,ENSGALG00000015332,ENSGALG00000004526,ENSGALG00000003560,ENSGALG00000009003,ENSGALG00000026903,ENSGALG00000012894,ENSGALG00000016804,ENSGALG00000041225,ENSGALG00000000168,ENSGALG00000008177,ENSGALG00000004917,ENSGALG00000003005,ENSGALG00000001716,ENSGALG00000010331,ENSGALG00000002015,ENSGALG00000000909,…
GO:0051969	regulation of transmission of nerve impulse	biological_process	0.00043012	0.058659	3	361	7	15035	ENSGALG00000038241,ENSGALG00000004526,ENSGALG00000003005
GO:0006935	chemotaxis	biological_process	0.00045466	0.061581	20	361	364	15035	ENSGALG00000038364,ENSGALG00000009626,ENSGALG00000047554,ENSGALG00000054196,ENSGALG00000000653,ENSGALG00000049551,ENSGALG00000033974,ENSGALG00000030822,ENSGALG00000042241,ENSGALG00000053549,ENSGALG00000036189,ENSGALG00000026098,ENSGALG00000010820,ENSGALG00000012456,ENSGALG00000003003,ENSGALG00000007620,ENSGALG00000029819,ENSGALG00000042308,ENSGALG00000016713,ENSGALG00000027973
GO:0045321	leukocyte activation	biological_process	0.00046251	0.062219	23	361	446	15035	ENSGALG00000026098,ENSGALG00000036142,ENSGALG00000003670,ENSGALG00000037522,ENSGALG00000053549,ENSGALG00000014786,ENSGALG00000034975,ENSGALG00000040276,ENSGALG00000008660,ENSGALG00000027973,ENSGALG00000014716,ENSGALG00000054783,ENSGALG00000010820,ENSGALG00000012456,ENSGALG00000015495,ENSGALG00000011347,ENSGALG00000013956,ENSGALG00000009626,ENSGALG00000036497,ENSGALG00000010915,ENSGALG00000016785,…
GO:0042330	taxis	biological_process	0.0004881	0.065217	20	361	366	15035	ENSGALG00000038364,ENSGALG00000009626,ENSGALG00000054196,ENSGALG00000047554,ENSGALG00000000653,ENSGALG00000049551,ENSGALG00000033974,ENSGALG00000030822,ENSGALG00000042241,ENSGALG00000053549,ENSGALG00000036189,ENSGALG00000026098,ENSGALG00000010820,ENSGALG00000003003,ENSGALG00000012456,ENSGALG00000029819,ENSGALG00000007620,ENSGALG00000042308,ENSGALG00000016713,ENSGALG00000027973
GO:0061448	connective tissue development	biological_process	0.00049332	0.065359	13	361	185	15035	ENSGALG00000006343,ENSGALG00000038364,ENSGALG00000011347,ENSGALG00000041555,ENSGALG00000047554,ENSGALG00000011214,ENSGALG00000004593,ENSGALG00000043064,ENSGALG00000000364,ENSGALG00000011740,ENSGALG00000030607,ENSGALG00000019312,ENSGALG00000040276
GO:0051241	negative regulation of multicellular organismal process	biological_process	0.00049646	0.065359	31	361	689	15035	ENSGALG00000033974,ENSGALG00000008306,ENSGALG00000006992,ENSGALG00000000653,ENSGALG00000000364,ENSGALG00000007047,ENSGALG00000006821,ENSGALG00000000607,ENSGALG00000041640,ENSGALG00000011347,ENSGALG00000009626,ENSGALG00000016945,ENSGALG00000031112,ENSGALG00000039690,ENSGALG00000002987,ENSGALG00000028770,ENSGALG00000011200,ENSGALG00000004526,ENSGALG00000016785,ENSGALG00000004184,ENSGALG00000038241,…
GO:0048705	skeletal system morphogenesis	biological_process	0.00049946	0.065359	13	361	184	15035	ENSGALG00000006453,ENSGALG00000040276,ENSGALG00000040432,ENSGALG00000023542,ENSGALG00000000364,ENSGALG00000032031,ENSGALG00000030607,ENSGALG00000014686,ENSGALG00000041640,ENSGALG00000031997,ENSGALG00000011347,ENSGALG00000041555,ENSGALG00000011214
GO:0045667	regulation of osteoblast differentiation	biological_process	0.00050238	0.065359	8	361	78	15035	ENSGALG00000006453,ENSGALG00000014716,ENSGALG00000040276,ENSGALG00000014686,ENSGALG00000041640,ENSGALG00000043555,ENSGALG00000011347,ENSGALG00000015150
GO:0098810	neurotransmitter reuptake	biological_process	0.00051523	0.066593	4	361	17	15035	ENSGALG00000008177,ENSGALG00000003560,ENSGALG00000009289,ENSGALG00000001693
GO:0005584	collagen type I trimer	cellular_component	0.00052465	0.066644	2	361	2	15035	ENSGALG00000041555,ENSGALG00000009641
GO:0051094	positive regulation of developmental process	biological_process	0.00052514	0.066644	35	361	818	15035	ENSGALG00000043064,ENSGALG00000042626,ENSGALG00000016905,ENSGALG00000030140,ENSGALG00000010179,ENSGALG00000010331,ENSGALG00000008660,ENSGALG00000006453,ENSGALG00000014716,ENSGALG00000009488,ENSGALG00000047554,ENSGALG00000013956,ENSGALG00000009626,ENSGALG00000011347,ENSGALG00000041555,ENSGALG00000033520,ENSGALG00000014908,ENSGALG00000000607,ENSGALG00000000909,ENSGALG00000013616,ENSGALG00000027786,…
GO:0048583	regulation of response to stimulus	biological_process	0.00052994	0.066644	79	361	2334	15035	ENSGALG00000016296,ENSGALG00000028770,ENSGALG00000002987,ENSGALG00000032415,ENSGALG00000007358,ENSGALG00000051882,ENSGALG00000012613,ENSGALG00000031997,ENSGALG00000041640,ENSGALG00000006821,ENSGALG00000006992,ENSGALG00000008306,ENSGALG00000053549,ENSGALG00000012321,ENSGALG00000027053,ENSGALG00000000731,ENSGALG00000023521,ENSGALG00000012456,ENSGALG00000040276,ENSGALG00000019312,ENSGALG00000015833,…
GO:0050708	regulation of protein secretion	biological_process	0.00053366	0.066644	14	361	211	15035	ENSGALG00000004833,ENSGALG00000028770,ENSGALG00000038364,ENSGALG00000004917,ENSGALG00000036497,ENSGALG00000016785,ENSGALG00000010179,ENSGALG00000013616,ENSGALG00000042626,ENSGALG00000004285,ENSGALG00000010820,ENSGALG00000023521,ENSGALG00000041640,ENSGALG00000011104
GO:0051604	protein maturation	biological_process	0.00053499	0.066644	13	361	186	15035	ENSGALG00000010331,ENSGALG00000032974,ENSGALG00000031343,ENSGALG00000036497,ENSGALG00000009626,ENSGALG00000033256,ENSGALG00000011214,ENSGALG00000002987,ENSGALG00000000653,ENSGALG00000009725,ENSGALG00000032031,ENSGALG00000005086,ENSGALG00000008660
GO:0044297	cell body	cellular_component	0.00053584	0.066644	14	361	213	15035	ENSGALG00000014716,ENSGALG00000003163,ENSGALG00000000653,ENSGALG00000007047,ENSGALG00000016804,ENSGALG00000042308,ENSGALG00000042626,ENSGALG00000002015,ENSGALG00000003560,ENSGALG00000039690,ENSGALG00000000909,ENSGALG00000032415,ENSGALG00000010331,ENSGALG00000043754
GO:0005307	choline:sodium symporter activity	molecular_function	0.00055528	0.067039	2	361	2	15035	ENSGALG00000017216,ENSGALG00000016804
GO:0008292	acetylcholine biosynthetic process	biological_process	0.00055528	0.067039	2	361	2	15035	ENSGALG00000016804,ENSGALG00000017216
GO:0033265	choline binding	molecular_function	0.00055528	0.067039	2	361	2	15035	ENSGALG00000016804,ENSGALG00000017216
GO:1900620	acetate ester biosynthetic process	biological_process	0.00055528	0.067039	2	361	2	15035	ENSGALG00000017216,ENSGALG00000016804
GO:1990266	neutrophil migration	biological_process	0.00055597	0.067039	7	361	59	15035	ENSGALG00000053549,ENSGALG00000049551,ENSGALG00000003003,ENSGALG00000012456,ENSGALG00000054196,ENSGALG00000026098,ENSGALG00000027973
GO:0007610	behavior	biological_process	0.00055956	0.067062	20	361	373	15035	ENSGALG00000003014,ENSGALG00000000653,ENSGALG00000040905,ENSGALG00000042241,ENSGALG00000016296,ENSGALG00000004526,ENSGALG00000009003,ENSGALG00000005707,ENSGALG00000032415,ENSGALG00000009289,ENSGALG00000003163,ENSGALG00000038241,ENSGALG00000040045,ENSGALG00000003005,ENSGALG00000010331,ENSGALG00000014944,ENSGALG00000016905,ENSGALG00000013616,ENSGALG00000002015,ENSGALG00000042626
GO:0015842	aminergic neurotransmitter loading into synaptic vesicle	biological_process	0.00058627	0.069751	2	361	2	15035	ENSGALG00000009289,ENSGALG00000001693
GO:0002605	negative regulation of dendritic cell antigen processing and presentation	biological_process	0.00058905	0.069751	2	361	2	15035	ENSGALG00000008306,ENSGALG00000009626
GO:0060084	synaptic transmission involved in micturition	biological_process	0.00059504	0.070041	2	361	2	15035	ENSGALG00000003005,ENSGALG00000003014
GO:0015101	organic cation transmembrane transporter activity	molecular_function	0.00060121	0.070075	4	361	17	15035	ENSGALG00000016804,ENSGALG00000017216,ENSGALG00000015439,ENSGALG00000015055
GO:0007178	transmembrane receptor protein serine/threonine kinase signaling pathway	biological_process	0.00060242	0.070075	15	361	239	15035	ENSGALG00000040276,ENSGALG00000019312,ENSGALG00000004285,ENSGALG00000014686,ENSGALG00000031997,ENSGALG00000030607,ENSGALG00000007358,ENSGALG00000036001,ENSGALG00000043555,ENSGALG00000009626,ENSGALG00000047554,ENSGALG00000014908,ENSGALG00000017050,ENSGALG00000028770,ENSGALG00000038364
GO:0061844	antimicrobial humoral immune response mediated by antimicrobial peptide	biological_process	0.00060703	0.070103	4	361	16	15035	ENSGALG00000026098,ENSGALG00000027973,ENSGALG00000006453,ENSGALG00000034150
GO:0032127	dense core granule membrane	cellular_component	0.00060975	0.070103	2	361	2	15035	ENSGALG00000042626,ENSGALG00000053549
GO:0045669	positive regulation of osteoblast differentiation	biological_process	0.00062543	0.071097	6	361	45	15035	ENSGALG00000040276,ENSGALG00000043555,ENSGALG00000006453,ENSGALG00000011347,ENSGALG00000014716,ENSGALG00000014686
GO:0005310	dicarboxylic acid transmembrane transporter activity	molecular_function	0.00062558	0.071097	5	361	30	15035	ENSGALG00000027423,ENSGALG00000000745,ENSGALG00000033638,ENSGALG00000041122,ENSGALG00000007959
GO:0071621	granulocyte chemotaxis	biological_process	0.00063434	0.07168	7	361	60	15035	ENSGALG00000049551,ENSGALG00000012456,ENSGALG00000003003,ENSGALG00000029819,ENSGALG00000026098,ENSGALG00000054196,ENSGALG00000027973
GO:0061430	bone trabecula morphogenesis	biological_process	0.00063886	0.071781	3	361	8	15035	ENSGALG00000037522,ENSGALG00000014686,ENSGALG00000041555
GO:0051610	serotonin uptake	biological_process	0.00065619	0.073312	3	361	8	15035	ENSGALG00000001693,ENSGALG00000009289,ENSGALG00000008177
GO:0071674	mononuclear cell migration	biological_process	0.00066182	0.073525	6	361	44	15035	ENSGALG00000003003,ENSGALG00000038364,ENSGALG00000049551,ENSGALG00000016713,ENSGALG00000026098,ENSGALG00000054196
GO:0006928	movement of cell or subcellular component	biological_process	0.0006684	0.073842	48	361	1261	15035	ENSGALG00000029836,XLOC_023902,ENSGALG00000003521,ENSGALG00000030822,ENSGALG00000000653,ENSGALG00000000364,ENSGALG00000010299,ENSGALG00000049551,ENSGALG00000005707,ENSGALG00000009626,ENSGALG00000015055,ENSGALG00000041555,ENSGALG00000047554,ENSGALG00000004526,ENSGALG00000043754,ENSGALG00000032320,ENSGALG00000000168,ENSGALG00000007620,ENSGALG00000016480,ENSGALG00000029819,ENSGALG00000010820,ENSGALG…
GO:0008237	metallopeptidase activity	molecular_function	0.00068484	0.075237	11	361	146	15035	ENSGALG00000040432,ENSGALG00000006992,ENSGALG00000005968,ENSGALG00000001115,ENSGALG00000001407,ENSGALG00000032031,ENSGALG00000017234,ENSGALG00000053549,ENSGALG00000010331,ENSGALG00000032974,ENSGALG00000031343
GO:0051044	positive regulation of membrane protein ectodomain proteolysis	biological_process	0.00068958	0.075339	3	361	8	15035	ENSGALG00000053549,ENSGALG00000023521,ENSGALG00000029836
GO:0008217	regulation of blood pressure	biological_process	0.00071227	0.07739	9	361	101	15035	ENSGALG00000000607,ENSGALG00000038241,ENSGALG00000000168,ENSGALG00000003521,ENSGALG00000006343,ENSGALG00000031343,ENSGALG00000008177,ENSGALG00000033256,ENSGALG00000002987
GO:0097386	glial cell projection	cellular_component	0.00073732	0.079675	3	361	8	15035	ENSGALG00000000909,ENSGALG00000042626,ENSGALG00000043754
GO:0007268	chemical synaptic transmission	biological_process	0.000758	0.081024	21	361	414	15035	ENSGALG00000041122,ENSGALG00000015332,ENSGALG00000014967,ENSGALG00000003014,ENSGALG00000011673,ENSGALG00000000653,ENSGALG00000003560,ENSGALG00000009003,ENSGALG00000004526,ENSGALG00000000168,ENSGALG00000026903,ENSGALG00000012894,ENSGALG00000016804,ENSGALG00000041225,ENSGALG00000042626,ENSGALG00000000909,ENSGALG00000002015,ENSGALG00000004917,ENSGALG00000003005,ENSGALG00000001716,ENSGALG00000010331
GO:0098916	anterograde trans-synaptic signaling	biological_process	0.000758	0.081024	21	361	414	15035	ENSGALG00000002015,ENSGALG00000000909,ENSGALG00000042626,ENSGALG00000001716,ENSGALG00000003005,ENSGALG00000010331,ENSGALG00000004917,ENSGALG00000000168,ENSGALG00000041225,ENSGALG00000016804,ENSGALG00000026903,ENSGALG00000012894,ENSGALG00000009003,ENSGALG00000003560,ENSGALG00000004526,ENSGALG00000015332,ENSGALG00000041122,ENSGALG00000000653,ENSGALG00000003014,ENSGALG00000011673,ENSGALG00000014967
GO:0090092	regulation of transmembrane receptor protein serine/threonine kinase signaling pathway	biological_process	0.00082739	0.087966	12	361	171	15035	ENSGALG00000030607,ENSGALG00000014686,ENSGALG00000031997,ENSGALG00000007358,ENSGALG00000019312,ENSGALG00000014908,ENSGALG00000028770,ENSGALG00000038364,ENSGALG00000047554,ENSGALG00000036001,ENSGALG00000043555,ENSGALG00000009626
GO:0044306	neuron projection terminus	cellular_component	0.00084255	0.088791	6	361	48	15035	ENSGALG00000015089,ENSGALG00000010331,ENSGALG00000032958,ENSGALG00000009289,ENSGALG00000001693,ENSGALG00000015332
GO:0015106	bicarbonate transmembrane transporter activity	molecular_function	0.00084413	0.088791	4	361	19	15035	ENSGALG00000000745,ENSGALG00000027423,ENSGALG00000007959,ENSGALG00000033638
GO:0007186	G-protein coupled receptor signaling pathway	biological_process	0.00088082	0.09216	31	361	698	15035	ENSGALG00000008032,ENSGALG00000054196,ENSGALG00000052981,ENSGALG00000038405,ENSGALG00000021303,ENSGALG00000012396,ENSGALG00000009725,ENSGALG00000028602,ENSGALG00000000653,ENSGALG00000016699,ENSGALG00000007047,ENSGALG00000032060,ENSGALG00000000607,ENSGALG00000049551,ENSGALG00000053747,ENSGALG00000027407,ENSGALG00000013616,ENSGALG00000032348,ENSGALG00000015150,ENSGALG00000008177,ENSGALG00000003163,…
GO:0046887	positive regulation of hormone secretion	biological_process	0.00089751	0.092961	7	361	65	15035	ENSGALG00000036497,ENSGALG00000004917,ENSGALG00000028770,ENSGALG00000007047,ENSGALG00000003560,ENSGALG00000038241,ENSGALG00000011104
GO:0051216	cartilage development	biological_process	0.00089788	0.092961	11	361	149	15035	ENSGALG00000019312,ENSGALG00000040276,ENSGALG00000000364,ENSGALG00000030607,ENSGALG00000011740,ENSGALG00000041555,ENSGALG00000011347,ENSGALG00000011214,ENSGALG00000043064,ENSGALG00000004593,ENSGALG00000038364
GO:0045202	synapse	cellular_component	0.00094042	0.096859	30	361	699	15035	ENSGALG00000009003,ENSGALG00000001693,ENSGALG00000009289,ENSGALG00000003560,ENSGALG00000004526,ENSGALG00000015332,ENSGALG00000041122,ENSGALG00000000653,ENSGALG00000003014,ENSGALG00000011673,ENSGALG00000014967,ENSGALG00000004642,ENSGALG00000042626,ENSGALG00000016905,ENSGALG00000003005,ENSGALG00000010331,ENSGALG00000001716,ENSGALG00000032958,ENSGALG00000008177,ENSGALG00000004917,ENSGALG00000039659,…
GO:0015301	anion:anion antiporter activity	molecular_function	0.00095082	0.097422	4	361	19	15035	ENSGALG00000033638,ENSGALG00000007959,ENSGALG00000027423,ENSGALG00000000745
GO:0009967	positive regulation of signal transduction	biological_process	0.00098128	0.10003	37	361	909	15035	ENSGALG00000031997,ENSGALG00000033974,ENSGALG00000006992,ENSGALG00000038364,ENSGALG00000028770,ENSGALG00000016296,ENSGALG00000043555,ENSGALG00000002766,ENSGALG00000054196,ENSGALG00000002987,ENSGALG00000023521,ENSGALG00000011104,ENSGALG00000039264,ENSGALG00000003547,ENSGALG00000053549,ENSGALG00000012321,ENSGALG00000009179,ENSGALG00000043662,ENSGALG00000036142,ENSGALG00000000653,ENSGALG00000049551,…
GO:0035987	endodermal cell differentiation	biological_process	0.00099458	0.10086	5	361	33	15035	ENSGALG00000006992,ENSGALG00000031112,ENSGALG00000003589,ENSGALG00000015908,ENSGALG00000015253
GO:0048009	insulin-like growth factor receptor signaling pathway	biological_process	0.0010199	0.1029	4	361	20	15035	ENSGALG00000014786,ENSGALG00000007358,ENSGALG00000040672,ENSGALG00000015495
GO:0048247	lymphocyte chemotaxis	biological_process	0.0010267	0.10306	5	361	32	15035	ENSGALG00000049551,ENSGALG00000053549,ENSGALG00000003003,ENSGALG00000026098,ENSGALG00000054196
GO:0051179	localization	biological_process	0.0010335	0.10322	124	361	4101	15035	ENSGALG00000013090,ENSGALG00000014971,ENSGALG00000004833,ENSGALG00000028770,ENSGALG00000006992,ENSGALG00000041122,ENSGALG00000008945,ENSGALG00000015332,ENSGALG00000031997,ENSGALG00000041640,ENSGALG00000012092,ENSGALG00000009725,ENSGALG00000005502,ENSGALG00000053549,ENSGALG00000041932,ENSGALG00000034975,ENSGALG00000027423,ENSGALG00000017216,ENSGALG00000003589,ENSGALG00000003034,ENSGALG00000042308,…
GO:0043269	regulation of ion transport	biological_process	0.001061	0.10543	19	361	364	15035	ENSGALG00000006992,ENSGALG00000011040,ENSGALG00000041640,ENSGALG00000031997,ENSGALG00000007047,ENSGALG00000048923,ENSGALG00000000364,ENSGALG00000006413,ENSGALG00000009626,ENSGALG00000038405,ENSGALG00000019114,ENSGALG00000011104,ENSGALG00000038543,ENSGALG00000002893,ENSGALG00000002015,ENSGALG00000042626,ENSGALG00000032506,ENSGALG00000008177,ENSGALG00000005502
GO:0006835	dicarboxylic acid transport	biological_process	0.0010984	0.10808	6	361	50	15035	ENSGALG00000027423,ENSGALG00000000745,ENSGALG00000033638,ENSGALG00000042626,ENSGALG00000007959,ENSGALG00000041122
GO:0001649	osteoblast differentiation	biological_process	0.0011079	0.10808	10	361	130	15035	ENSGALG00000040276,ENSGALG00000019312,ENSGALG00000006453,ENSGALG00000014716,ENSGALG00000014686,ENSGALG00000041640,ENSGALG00000041555,ENSGALG00000011347,ENSGALG00000043555,ENSGALG00000015150
GO:0051051	negative regulation of transport	biological_process	0.0011084	0.10808	15	361	253	15035	ENSGALG00000013616,ENSGALG00000042626,ENSGALG00000032506,ENSGALG00000009626,ENSGALG00000008177,ENSGALG00000028770,ENSGALG00000038364,ENSGALG00000006992,ENSGALG00000000168,ENSGALG00000031997,ENSGALG00000041640,ENSGALG00000023521,ENSGALG00000048923,ENSGALG00000010820,ENSGALG00000000364
GO:0010562	positive regulation of phosphorus metabolic process	biological_process	0.001115	0.10808	29	361	660	15035	ENSGALG00000003003,ENSGALG00000023521,ENSGALG00000038241,ENSGALG00000014716,ENSGALG00000006453,ENSGALG00000011104,ENSGALG00000003589,ENSGALG00000012321,ENSGALG00000053549,ENSGALG00000008177,ENSGALG00000036001,ENSGALG00000043662,ENSGALG00000000607,ENSGALG00000049551,ENSGALG00000033974,ENSGALG00000006992,ENSGALG00000028770,ENSGALG00000040672,ENSGALG00000016296,ENSGALG00000043555,ENSGALG00000009626,…
GO:0045937	positive regulation of phosphate metabolic process	biological_process	0.001115	0.10808	29	361	660	15035	ENSGALG00000043555,ENSGALG00000009626,ENSGALG00000011347,ENSGALG00000006413,ENSGALG00000015495,ENSGALG00000047554,ENSGALG00000054196,ENSGALG00000049157,ENSGALG00000002987,ENSGALG00000002766,ENSGALG00000028770,ENSGALG00000040672,ENSGALG00000016296,ENSGALG00000033974,ENSGALG00000006992,ENSGALG00000000607,ENSGALG00000049551,ENSGALG00000036001,ENSGALG00000043662,ENSGALG00000053549,ENSGALG00000012321,…
GO:0003013	circulatory system process	biological_process	0.0011492	0.11085	15	361	256	15035	ENSGALG00000029298,ENSGALG00000002987,ENSGALG00000033256,ENSGALG00000008177,ENSGALG00000040045,ENSGALG00000031343,ENSGALG00000006343,ENSGALG00000003521,ENSGALG00000000168,ENSGALG00000038241,ENSGALG00000003163,ENSGALG00000012894,ENSGALG00000000607,ENSGALG00000010820,ENSGALG00000000364
GO:0001706	endoderm formation	biological_process	0.0011568	0.11105	5	361	34	15035	ENSGALG00000031112,ENSGALG00000006992,ENSGALG00000003589,ENSGALG00000015253,ENSGALG00000015908
GO:0042127	regulation of cell proliferation	biological_process	0.001182	0.11194	36	361	885	15035	ENSGALG00000000909,ENSGALG00000040276,ENSGALG00000004184,ENSGALG00000039264,ENSGALG00000042308,ENSGALG00000054783,ENSGALG00000012456,ENSGALG00000002987,ENSGALG00000015495,ENSGALG00000038364,ENSGALG00000006992,ENSGALG00000012396,ENSGALG00000033974,ENSGALG00000041640,ENSGALG00000031997,ENSGALG00000054770,ENSGALG00000026137,ENSGALG00000006821,ENSGALG00000010036,ENSGALG00000004593,ENSGALG00000043064,…
GO:0010951	negative regulation of endopeptidase activity	biological_process	0.0011822	0.11194	10	361	130	15035	ENSGALG00000003589,ENSGALG00000006453,ENSGALG00000033974,ENSGALG00000006992,ENSGALG00000008660,ENSGALG00000012872,ENSGALG00000009626,ENSGALG00000019552,ENSGALG00000011214,ENSGALG00000002987
GO:0005125	cytokine activity	molecular_function	0.0011831	0.11194	9	361	104	15035	XLOC_033031,ENSGALG00000049551,ENSGALG00000029819,ENSGALG00000003003,ENSGALG00000054196,ENSGALG00000026098,ENSGALG00000009179,ENSGALG00000010915,ENSGALG00000028770
GO:0002063	chondrocyte development	biological_process	0.0013058	0.12296	5	361	35	15035	ENSGALG00000030607,ENSGALG00000040276,ENSGALG00000004593,ENSGALG00000011214,ENSGALG00000011347
GO:0010810	regulation of cell-substrate adhesion	biological_process	0.0013613	0.12746	10	361	137	15035	ENSGALG00000003589,ENSGALG00000012456,ENSGALG00000026137,ENSGALG00000041555,ENSGALG00000009626,ENSGALG00000043555,ENSGALG00000042079,ENSGALG00000036189,ENSGALG00000014786,ENSGALG00000015253
GO:0042116	macrophage activation	biological_process	0.0013664	0.12746	5	361	35	15035	ENSGALG00000037522,ENSGALG00000016785,ENSGALG00000027973,ENSGALG00000009626,ENSGALG00000008660
GO:0030667	secretory granule membrane	cellular_component	0.0013957	0.12957	5	361	36	15035	ENSGALG00000042626,ENSGALG00000004184,ENSGALG00000053549,ENSGALG00000014997,ENSGALG00000040045
GO:0032964	collagen biosynthetic process	biological_process	0.0014243	0.13162	4	361	21	15035	ENSGALG00000011214,ENSGALG00000002987,ENSGALG00000011347,ENSGALG00000041555
GO:0031045	dense core granule	cellular_component	0.0014482	0.1332	3	361	10	15035	ENSGALG00000042626,ENSGALG00000053549,ENSGALG00000029819
GO:0030593	neutrophil chemotaxis	biological_process	0.0014789	0.13443	6	361	51	15035	ENSGALG00000012456,ENSGALG00000003003,ENSGALG00000049551,ENSGALG00000027973,ENSGALG00000026098,ENSGALG00000054196
GO:0060073	micturition	biological_process	0.0014854	0.13443	2	361	3	15035	ENSGALG00000003014,ENSGALG00000003005
GO:0006811	ion transport	biological_process	0.0014869	0.13443	43	361	1136	15035	ENSGALG00000016804,ENSGALG00000002893,ENSGALG00000011104,ENSGALG00000017216,ENSGALG00000003005,ENSGALG00000027423,ENSGALG00000005502,ENSGALG00000041932,ENSGALG00000028871,ENSGALG00000002015,ENSGALG00000003014,ENSGALG00000048923,ENSGALG00000007047,ENSGALG00000031997,ENSGALG00000041640,ENSGALG00000041122,ENSGALG00000006992,ENSGALG00000006413,ENSGALG00000014971,ENSGALG00000040541,ENSGALG00000032465,…
GO:0010466	negative regulation of peptidase activity	biological_process	0.0014887	0.13443	10	361	134	15035	ENSGALG00000003589,ENSGALG00000006453,ENSGALG00000033974,ENSGALG00000006992,ENSGALG00000008660,ENSGALG00000012872,ENSGALG00000009626,ENSGALG00000011214,ENSGALG00000019552,ENSGALG00000002987
GO:0015701	bicarbonate transport	biological_process	0.0015156	0.13623	4	361	22	15035	ENSGALG00000007959,ENSGALG00000033638,ENSGALG00000000745,ENSGALG00000027423
GO:0008449	N-acetylglucosamine-6-sulfatase activity	molecular_function	0.001533	0.13644	2	361	3	15035	ENSGALG00000004593,ENSGALG00000009856
GO:0065008	regulation of biological quality	biological_process	0.0015334	0.13644	79	361	2424	15035	ENSGALG00000016804,ENSGALG00000002893,ENSGALG00000023521,ENSGALG00000017216,ENSGALG00000040276,ENSGALG00000001716,ENSGALG00000053549,ENSGALG00000003670,ENSGALG00000009725,ENSGALG00000051882,ENSGALG00000031997,ENSGALG00000015332,ENSGALG00000012396,ENSGALG00000041122,ENSGALG00000028770,ENSGALG00000004833,ENSGALG00000002987,ENSGALG00000009488,ENSGALG00000010820,ENSGALG00000038241,ENSGALG00000038543,…
GO:0009749	response to glucose	biological_process	0.0015386	0.13644	7	361	72	15035	ENSGALG00000011104,ENSGALG00000029836,ENSGALG00000009626,ENSGALG00000036497,ENSGALG00000023521,ENSGALG00000043754,ENSGALG00000004285
GO:0001503	ossification	biological_process	0.0015507	0.1369	14	361	235	15035	ENSGALG00000015150,ENSGALG00000037522,ENSGALG00000041555,ENSGALG00000043555,ENSGALG00000011347,ENSGALG00000032031,ENSGALG00000041640,ENSGALG00000014686,ENSGALG00000011740,ENSGALG00000006453,ENSGALG00000014716,ENSGALG00000023542,ENSGALG00000040276,ENSGALG00000019312
GO:0072348	sulfur compound transport	biological_process	0.0015867	0.13945	5	361	36	15035	ENSGALG00000027423,ENSGALG00000000745,ENSGALG00000040541,ENSGALG00000033638,ENSGALG00000007959
GO:0042737	drug catabolic process	biological_process	0.001641	0.14323	7	361	71	15035	ENSGALG00000008178,ENSGALG00000008283,ENSGALG00000008177,ENSGALG00000040045,ENSGALG00000015977,ENSGALG00000015833,ENSGALG00000031343
GO:0008970	phosphatidylcholine 1-acylhydrolase activity	molecular_function	0.001649	0.14323	2	361	3	15035	ENSGALG00000014938,ENSGALG00000014997
GO:0015695	organic cation transport	biological_process	0.0016554	0.14323	4	361	22	15035	ENSGALG00000015439,ENSGALG00000017216,ENSGALG00000015055,ENSGALG00000016804
GO:0005507	copper ion binding	molecular_function	0.0016597	0.14323	5	361	36	15035	ENSGALG00000013090,ENSGALG00000018557,ENSGALG00000029298,ENSGALG00000036142,ENSGALG00000040045
GO:0009746	response to hexose	biological_process	0.0016732	0.14323	7	361	73	15035	ENSGALG00000009626,ENSGALG00000029836,ENSGALG00000011104,ENSGALG00000004285,ENSGALG00000023521,ENSGALG00000036497,ENSGALG00000043754
GO:0034284	response to monosaccharide	biological_process	0.0016732	0.14323	7	361	73	15035	ENSGALG00000023521,ENSGALG00000036497,ENSGALG00000043754,ENSGALG00000004285,ENSGALG00000009626,ENSGALG00000029836,ENSGALG00000011104
GO:0043169	cation binding	molecular_function	0.0017254	0.14657	72	361	2173	15035	ENSGALG00000016804,ENSGALG00000017216,ENSGALG00000001793,ENSGALG00000053549,ENSGALG00000021286,ENSGALG00000015150,ENSGALG00000009601,ENSGALG00000040463,ENSGALG00000052653,ENSGALG00000012613,ENSGALG00000016908,ENSGALG00000012092,ENSGALG00000006992,ENSGALG00000004833,ENSGALG00000039742,ENSGALG00000013090,ENSGALG00000016464,ENSGALG00000001407,ENSGALG00000006453,ENSGALG00000004917,ENSGALG00000008177,…
GO:0098992	neuronal dense core vesicle	cellular_component	0.001727	0.14657	2	361	3	15035	ENSGALG00000042626,ENSGALG00000029819
GO:0007165	signal transduction	biological_process	0.0017452	0.14748	110	361	3597	15035	ENSGALG00000033974,ENSGALG00000007047,ENSGALG00000026137,ENSGALG00000003014,ENSGALG00000014686,ENSGALG00000043555,ENSGALG00000015495,ENSGALG00000054196,ENSGALG00000002766,ENSGALG00000038364,ENSGALG00000016785,ENSGALG00000034337,ENSGALG00000003163,ENSGALG00000039264,ENSGALG00000011104,ENSGALG00000012307,ENSGALG00000003547,ENSGALG00000036798,ENSGALG00000014726,ENSGALG00000009179,ENSGALG00000027786,…
GO:0002578	negative regulation of antigen processing and presentation	biological_process	0.0017566	0.14782	2	361	3	15035	ENSGALG00000008306,ENSGALG00000009626
GO:0050840	extracellular matrix binding	molecular_function	0.001765	0.14789	5	361	37	15035	ENSGALG00000003589,ENSGALG00000004184,ENSGALG00000009626,ENSGALG00000001407,ENSGALG00000042079
GO:0009986	cell surface	cellular_component	0.0018044	0.15055	21	361	438	15035	ENSGALG00000001407,ENSGALG00000016480,ENSGALG00000007620,ENSGALG00000006453,ENSGALG00000014716,ENSGALG00000004184,ENSGALG00000053549,ENSGALG00000017234,ENSGALG00000004593,ENSGALG00000000745,ENSGALG00000031997,ENSGALG00000051054,ENSGALG00000000653,ENSGALG00000039209,ENSGALG00000016785,ENSGALG00000016296,ENSGALG00000004526,ENSGALG00000033520,ENSGALG00000031343,ENSGALG00000002987,ENSGALG00000009626
GO:0033604	negative regulation of catecholamine secretion	biological_process	0.0018282	0.15191	2	361	3	15035	ENSGALG00000010820,ENSGALG00000042626
GO:0043005	neuron projection	cellular_component	0.0018521	0.15324	29	361	693	15035	ENSGALG00000042626,ENSGALG00000002015,ENSGALG00000003005,ENSGALG00000010331,ENSGALG00000032958,ENSGALG00000006221,ENSGALG00000003163,ENSGALG00000014716,ENSGALG00000000168,ENSGALG00000041225,ENSGALG00000016804,ENSGALG00000015089,ENSGALG00000012894,ENSGALG00000026903,ENSGALG00000042308,ENSGALG00000001693,ENSGALG00000005707,ENSGALG00000009003,ENSGALG00000039690,ENSGALG00000009289,ENSGALG00000003560,…
GO:0072679	thymocyte migration	biological_process	0.0018636	0.15355	2	361	3	15035	ENSGALG00000053549,ENSGALG00000003003
GO:0032103	positive regulation of response to external stimulus	biological_process	0.0018881	0.15493	10	361	140	15035	ENSGALG00000009626,ENSGALG00000002987,ENSGALG00000026098,ENSGALG00000013616,ENSGALG00000053549,ENSGALG00000012801,ENSGALG00000016785,ENSGALG00000029819,ENSGALG00000012456,ENSGALG00000016713
GO:0035803	egg coat formation	biological_process	0.0019073	0.15585	2	361	3	15035	ENSGALG00000011347,ENSGALG00000001559
GO:0051937	catecholamine transport	biological_process	0.0019351	0.15748	5	361	38	15035	ENSGALG00000010820,ENSGALG00000038241,ENSGALG00000002015,ENSGALG00000042626,ENSGALG00000003560
GO:0031646	positive regulation of neurological system process	biological_process	0.0019446	0.1576	4	361	24	15035	ENSGALG00000003005,ENSGALG00000004526,ENSGALG00000038241,ENSGALG00000008660
GO:0046676	negative regulation of insulin secretion	biological_process	0.0019605	0.15822	4	361	23	15035	ENSGALG00000028770,ENSGALG00000038364,ENSGALG00000010820,ENSGALG00000023521
GO:0042327	positive regulation of phosphorylation	biological_process	0.0019782	0.15822	27	361	622	15035	ENSGALG00000002766,ENSGALG00000047554,ENSGALG00000054196,ENSGALG00000002987,ENSGALG00000049157,ENSGALG00000006413,ENSGALG00000009626,ENSGALG00000043555,ENSGALG00000016296,ENSGALG00000040672,ENSGALG00000028770,ENSGALG00000006992,ENSGALG00000033974,ENSGALG00000049551,ENSGALG00000000607,ENSGALG00000043662,ENSGALG00000036001,ENSGALG00000008177,ENSGALG00000053549,ENSGALG00000012321,ENSGALG00000003589,…
GO:0030424	axon	cellular_component	0.0019791	0.15822	16	361	300	15035	ENSGALG00000016804,ENSGALG00000042308,ENSGALG00000002015,ENSGALG00000042626,ENSGALG00000010331,ENSGALG00000006221,ENSGALG00000039356,ENSGALG00000011040,ENSGALG00000015332,ENSGALG00000000653,ENSGALG00000016908,ENSGALG00000048923,ENSGALG00000009289,ENSGALG00000039690,ENSGALG00000001693,ENSGALG00000009003
GO:0010033	response to organic substance	biological_process	0.0019843	0.15822	58	361	1669	15035	ENSGALG00000033974,ENSGALG00000006992,ENSGALG00000012396,ENSGALG00000006821,ENSGALG00000031997,ENSGALG00000014686,ENSGALG00000007358,ENSGALG00000043555,ENSGALG00000039690,ENSGALG00000054196,ENSGALG00000031112,ENSGALG00000028770,ENSGALG00000016785,ENSGALG00000011104,ENSGALG00000004184,ENSGALG00000002289,ENSGALG00000003547,ENSGALG00000040276,ENSGALG00000036798,ENSGALG00000019312,ENSGALG00000014768,…
GO:0015294	solute:cation symporter activity	molecular_function	0.0020078	0.15945	7	361	76	15035	ENSGALG00000001693,ENSGALG00000003560,ENSGALG00000009289,ENSGALG00000017216,ENSGALG00000040541,ENSGALG00000016804,ENSGALG00000041932
GO:0030155	regulation of cell adhesion	biological_process	0.0020172	0.15956	19	361	387	15035	ENSGALG00000008306,ENSGALG00000026137,ENSGALG00000041555,ENSGALG00000043555,ENSGALG00000013956,ENSGALG00000011347,ENSGALG00000009626,ENSGALG00000004526,ENSGALG00000042079,ENSGALG00000015253,ENSGALG00000003589,ENSGALG00000014716,ENSGALG00000053601,ENSGALG00000012456,ENSGALG00000036142,ENSGALG00000014786,ENSGALG00000036189,ENSGALG00000006775,ENSGALG00000053549
GO:0010812	negative regulation of cell-substrate adhesion	biological_process	0.0020301	0.15995	5	361	39	15035	ENSGALG00000041555,ENSGALG00000009626,ENSGALG00000014786,ENSGALG00000036189,ENSGALG00000026137
GO:0001934	positive regulation of protein phosphorylation	biological_process	0.0020448	0.16046	26	361	592	15035	ENSGALG00000006992,ENSGALG00000033974,ENSGALG00000049551,ENSGALG00000000607,ENSGALG00000002766,ENSGALG00000054196,ENSGALG00000047554,ENSGALG00000049157,ENSGALG00000002987,ENSGALG00000006413,ENSGALG00000009626,ENSGALG00000043555,ENSGALG00000016296,ENSGALG00000040672,ENSGALG00000028770,ENSGALG00000011104,ENSGALG00000003589,ENSGALG00000014716,ENSGALG00000038241,ENSGALG00000006453,ENSGALG00000023521,…
GO:0008146	sulfotransferase activity	molecular_function	0.0020899	0.16335	6	361	55	15035	ENSGALG00000024056,ENSGALG00000001371,ENSGALG00000030607,ENSGALG00000047475,ENSGALG00000006440,ENSGALG00000031058
GO:0001775	cell activation	biological_process	0.0022035	0.17156	23	361	502	15035	ENSGALG00000026098,ENSGALG00000003670,ENSGALG00000036142,ENSGALG00000037522,ENSGALG00000053549,ENSGALG00000014786,ENSGALG00000034975,ENSGALG00000040276,ENSGALG00000008660,ENSGALG00000027973,ENSGALG00000014716,ENSGALG00000054783,ENSGALG00000012456,ENSGALG00000010820,ENSGALG00000015495,ENSGALG00000009626,ENSGALG00000013956,ENSGALG00000011347,ENSGALG00000036497,ENSGALG00000016785,ENSGALG00000010915,…
GO:0001958	endochondral ossification	biological_process	0.0022353	0.17267	4	361	24	15035	ENSGALG00000032031,ENSGALG00000041555,ENSGALG00000040276,ENSGALG00000023542
GO:0036075	replacement ossification	biological_process	0.0022353	0.17267	4	361	24	15035	ENSGALG00000023542,ENSGALG00000040276,ENSGALG00000041555,ENSGALG00000032031
GO:0008015	blood circulation	biological_process	0.0024511	0.1886	14	361	249	15035	ENSGALG00000006343,ENSGALG00000031343,ENSGALG00000040045,ENSGALG00000008177,ENSGALG00000033256,ENSGALG00000029298,ENSGALG00000002987,ENSGALG00000000364,ENSGALG00000000607,ENSGALG00000012894,ENSGALG00000003163,ENSGALG00000038241,ENSGALG00000000168,ENSGALG00000003521
GO:0016525	negative regulation of angiogenesis	biological_process	0.0025358	0.19396	6	361	59	15035	ENSGALG00000006821,ENSGALG00000011200,ENSGALG00000036189,ENSGALG00000016945,ENSGALG00000009626,ENSGALG00000004184
GO:0006837	serotonin transport	biological_process	0.0025403	0.19396	3	361	12	15035	ENSGALG00000008177,ENSGALG00000001693,ENSGALG00000009289
GO:0012506	vesicle membrane	cellular_component	0.002563	0.19494	12	361	198	15035	ENSGALG00000041122,ENSGALG00000004184,ENSGALG00000014967,ENSGALG00000028602,ENSGALG00000042626,ENSGALG00000009289,ENSGALG00000001693,ENSGALG00000006413,ENSGALG00000053549,ENSGALG00000008177,ENSGALG00000014997,ENSGALG00000040045
GO:0030334	regulation of cell migration	biological_process	0.0025901	0.19557	23	361	516	15035	ENSGALG00000009626,ENSGALG00000041555,ENSGALG00000006413,ENSGALG00000043754,ENSGALG00000038364,ENSGALG00000008945,ENSGALG00000003521,ENSGALG00000006992,ENSGALG00000033974,ENSGALG00000029836,ENSGALG00000041640,ENSGALG00000000364,ENSGALG00000014786,ENSGALG00000053549,ENSGALG00000036189,ENSGALG00000000168,ENSGALG00000004184,ENSGALG00000003589,ENSGALG00000016713,ENSGALG00000023521,ENSGALG00000003034,…
GO:0001530	lipopolysaccharide binding	molecular_function	0.0025911	0.19557	4	361	24	15035	ENSGALG00000034150,ENSGALG00000002503,ENSGALG00000027973,ENSGALG00000006453
GO:0005518	collagen binding	molecular_function	0.0026101	0.19625	5	361	41	15035	ENSGALG00000011214,ENSGALG00000004184,ENSGALG00000009626,ENSGALG00000042079,ENSGALG00000004833
GO:0051716	cellular response to stimulus	biological_process	0.0026206	0.19629	134	361	4577	15035	ENSGALG00000002766,ENSGALG00000039690,ENSGALG00000038364,ENSGALG00000034337,ENSGALG00000016785,ENSGALG00000009179,ENSGALG00000028871,ENSGALG00000027786,ENSGALG00000013616,ENSGALG00000043662,ENSGALG00000039264,ENSGALG00000027973,ENSGALG00000004184,ENSGALG00000036798,ENSGALG00000014726,ENSGALG00000018557,ENSGALG00000049157,ENSGALG00000040672,ENSGALG00000014908,ENSGALG00000015028,ENSGALG00000021303,…
GO:0012505	endomembrane system	cellular_component	0.0027024	0.20166	72	361	2206	15035	ENSGALG00000024056,ENSGALG00000012121,ENSGALG00000033638,ENSGALG00000029298,ENSGALG00000011214,ENSGALG00000010331,ENSGALG00000032958,ENSGALG00000040045,ENSGALG00000008177,ENSGALG00000006453,ENSGALG00000038241,ENSGALG00000010820,ENSGALG00000009626,ENSGALG00000009289,ENSGALG00000033520,ENSGALG00000040038,ENSGALG00000028602,ENSGALG00000011673,ENSGALG00000004642,ENSGALG00000040463,ENSGALG00000034975,…
GO:0045596	negative regulation of cell differentiation	biological_process	0.0027754	0.20561	20	361	421	15035	ENSGALG00000019312,ENSGALG00000015150,ENSGALG00000014786,ENSGALG00000000909,ENSGALG00000042626,ENSGALG00000036142,ENSGALG00000003670,ENSGALG00000007047,ENSGALG00000000653,ENSGALG00000041640,ENSGALG00000000607,ENSGALG00000008306,ENSGALG00000005968,ENSGALG00000033974,ENSGALG00000006992,ENSGALG00000038364,ENSGALG00000004526,ENSGALG00000011347,ENSGALG00000031112,ENSGALG00000039690
GO:0090087	regulation of peptide transport	biological_process	0.0027761	0.20561	18	361	363	15035	ENSGALG00000010820,ENSGALG00000023521,ENSGALG00000011104,ENSGALG00000014786,ENSGALG00000010179,ENSGALG00000004917,ENSGALG00000042626,ENSGALG00000013616,ENSGALG00000004285,ENSGALG00000041640,ENSGALG00000038364,ENSGALG00000028770,ENSGALG00000004833,ENSGALG00000016785,ENSGALG00000036497,ENSGALG00000006413,ENSGALG00000003560,ENSGALG00000030545
GO:0048706	embryonic skeletal system development	biological_process	0.0028066	0.20709	8	361	100	15035	ENSGALG00000040276,ENSGALG00000032031,ENSGALG00000030607,ENSGALG00000041640,ENSGALG00000011347,ENSGALG00000041555,ENSGALG00000033256,ENSGALG00000004593
GO:0070201	regulation of establishment of protein localization	biological_process	0.0029315	0.21551	18	361	365	15035	ENSGALG00000011104,ENSGALG00000010820,ENSGALG00000023521,ENSGALG00000013616,ENSGALG00000042626,ENSGALG00000004917,ENSGALG00000010179,ENSGALG00000014786,ENSGALG00000004285,ENSGALG00000041640,ENSGALG00000006413,ENSGALG00000009003,ENSGALG00000030545,ENSGALG00000004833,ENSGALG00000038364,ENSGALG00000028770,ENSGALG00000036497,ENSGALG00000016785
GO:0008009	chemokine activity	molecular_function	0.0029527	0.21625	4	361	24	15035	ENSGALG00000049551,ENSGALG00000003003,ENSGALG00000054196,ENSGALG00000026098
GO:2000181	negative regulation of blood vessel morphogenesis	biological_process	0.0030015	0.21826	6	361	61	15035	ENSGALG00000011200,ENSGALG00000006821,ENSGALG00000036189,ENSGALG00000009626,ENSGALG00000004184,ENSGALG00000016945
GO:0030485	smooth muscle contractile fiber	cellular_component	0.0030021	0.21826	2	361	4	15035	ENSGALG00000043555,ENSGALG00000006343
GO:0009743	response to carbohydrate	biological_process	0.0030601	0.22088	7	361	81	15035	ENSGALG00000004285,ENSGALG00000043754,ENSGALG00000023521,ENSGALG00000036497,ENSGALG00000009626,ENSGALG00000029836,ENSGALG00000011104
GO:0043567	regulation of insulin-like growth factor receptor signaling pathway	biological_process	0.0030605	0.22088	3	361	13	15035	ENSGALG00000007358,ENSGALG00000040672,ENSGALG00000015495
GO:0010694	positive regulation of alkaline phosphatase activity	biological_process	0.0031262	0.2248	2	361	4	15035	ENSGALG00000011347,ENSGALG00000043555
GO:0090278	negative regulation of peptide hormone secretion	biological_process	0.0031628	0.22569	4	361	26	15035	ENSGALG00000038364,ENSGALG00000028770,ENSGALG00000010820,ENSGALG00000023521
GO:0010757	negative regulation of plasminogen activation	biological_process	0.0031821	0.22569	2	361	4	15035	ENSGALG00000002987,ENSGALG00000009626
GO:0098881	exocytic insertion of neurotransmitter receptor to plasma membrane	biological_process	0.0031842	0.22569	2	361	4	15035	ENSGALG00000015332,ENSGALG00000009003
GO:0098967	exocytic insertion of neurotransmitter receptor to postsynaptic membrane	biological_process	0.0031842	0.22569	2	361	4	15035	ENSGALG00000009003,ENSGALG00000015332
GO:0050433	regulation of catecholamine secretion	biological_process	0.0032306	0.22773	4	361	26	15035	ENSGALG00000010820,ENSGALG00000002015,ENSGALG00000042626,ENSGALG00000038241
GO:0003071	renal system process involved in regulation of systemic arterial blood pressure	biological_process	0.0032399	0.22773	3	361	13	15035	ENSGALG00000033256,ENSGALG00000000168,ENSGALG00000002987
GO:0044057	regulation of system process	biological_process	0.0032487	0.22773	15	361	285	15035	ENSGALG00000000364,ENSGALG00000007047,ENSGALG00000012894,ENSGALG00000038241,ENSGALG00000003163,ENSGALG00000000168,ENSGALG00000008660,ENSGALG00000003521,ENSGALG00000015028,ENSGALG00000003005,ENSGALG00000028770,ENSGALG00000040045,ENSGALG00000004526,ENSGALG00000008177,ENSGALG00000043555
GO:0008291	acetylcholine metabolic process	biological_process	0.0032799	0.22773	2	361	4	15035	ENSGALG00000016804,ENSGALG00000017216
GO:1900619	acetate ester metabolic process	biological_process	0.0032799	0.22773	2	361	4	15035	ENSGALG00000017216,ENSGALG00000016804
GO:0051926	negative regulation of calcium ion transport	biological_process	0.0032821	0.22773	4	361	26	15035	ENSGALG00000032506,ENSGALG00000048923,ENSGALG00000000364,ENSGALG00000008177
GO:0003073	regulation of systemic arterial blood pressure	biological_process	0.0033087	0.22804	6	361	61	15035	ENSGALG00000033256,ENSGALG00000003521,ENSGALG00000002987,ENSGALG00000000168,ENSGALG00000031343,ENSGALG00000000607
GO:0019730	antimicrobial humoral response	biological_process	0.0033147	0.22804	4	361	25	15035	ENSGALG00000034150,ENSGALG00000026098,ENSGALG00000027973,ENSGALG00000006453
GO:0086023	adenylate cyclase-activating adrenergic receptor signaling pathway involved in heart process	biological_process	0.0033212	0.22804	2	361	4	15035	ENSGALG00000010820,ENSGALG00000008177
GO:0005335	serotonin:sodium symporter activity	molecular_function	0.0033607	0.22841	2	361	4	15035	ENSGALG00000009289,ENSGALG00000001693
GO:0015222	serotonin transmembrane transporter activity	molecular_function	0.0033607	0.22841	2	361	4	15035	ENSGALG00000009289,ENSGALG00000001693
GO:0004720	protein-lysine 6-oxidase activity	molecular_function	0.0033727	0.22841	2	361	4	15035	ENSGALG00000013090,ENSGALG00000036142
GO:0018057	peptidyl-lysine oxidation	biological_process	0.0033727	0.22841	2	361	4	15035	ENSGALG00000036142,ENSGALG00000013090
GO:0002376	immune system process	biological_process	0.0033897	0.22878	45	361	1243	15035	ENSGALG00000010915,ENSGALG00000016785,ENSGALG00000038364,ENSGALG00000054196,ENSGALG00000015495,ENSGALG00000051054,ENSGALG00000034150,ENSGALG00000008306,ENSGALG00000053549,ENSGALG00000037522,ENSGALG00000034975,ENSGALG00000036142,ENSGALG00000003670,ENSGALG00000009179,ENSGALG00000000731,ENSGALG00000016713,ENSGALG00000054783,ENSGALG00000012456,ENSGALG00000014726,ENSGALG00000040276,ENSGALG00000003547,…
GO:0051918	negative regulation of fibrinolysis	biological_process	0.0034282	0.23059	2	361	4	15035	ENSGALG00000009626,ENSGALG00000002987
GO:0060392	negative regulation of SMAD protein signal transduction	biological_process	0.0034414	0.23069	2	361	4	15035	ENSGALG00000038364,ENSGALG00000007358
GO:0048167	regulation of synaptic plasticity	biological_process	0.0034604	0.2309	8	361	106	15035	ENSGALG00000000168,ENSGALG00000026903,ENSGALG00000000653,ENSGALG00000042626,ENSGALG00000000909,ENSGALG00000009003,ENSGALG00000004526,ENSGALG00000010331
GO:0036477	somatodendritic compartment	cellular_component	0.0034678	0.2309	18	361	376	15035	ENSGALG00000010331,ENSGALG00000006221,ENSGALG00000042626,ENSGALG00000002015,ENSGALG00000016804,ENSGALG00000026903,ENSGALG00000042308,ENSGALG00000012894,ENSGALG00000003163,ENSGALG00000014716,ENSGALG00000000168,ENSGALG00000009003,ENSGALG00000005707,ENSGALG00000003560,ENSGALG00000039690,ENSGALG00000032415,ENSGALG00000000653,ENSGALG00000007047
GO:0051048	negative regulation of secretion	biological_process	0.0035099	0.23291	8	361	105	15035	ENSGALG00000023521,ENSGALG00000010820,ENSGALG00000048923,ENSGALG00000000168,ENSGALG00000038364,ENSGALG00000028770,ENSGALG00000042626,ENSGALG00000013616
GO:1901701	cellular response to oxygen-containing compound	biological_process	0.003615	0.23909	24	361	557	15035	ENSGALG00000027786,ENSGALG00000026098,ENSGALG00000043064,ENSGALG00000037522,ENSGALG00000012801,ENSGALG00000041932,ENSGALG00000014786,ENSGALG00000011104,ENSGALG00000006453,ENSGALG00000036798,ENSGALG00000023521,ENSGALG00000012894,ENSGALG00000041555,ENSGALG00000018557,ENSGALG00000031112,ENSGALG00000028770,ENSGALG00000036497,ENSGALG00000029836,ENSGALG00000033974,ENSGALG00000012396,ENSGALG00000003521,…
GO:1903317	regulation of protein maturation	biological_process	0.0036425	0.24009	5	361	44	15035	ENSGALG00000000653,ENSGALG00000036497,ENSGALG00000009626,ENSGALG00000002987,ENSGALG00000008660
GO:0099504	synaptic vesicle cycle	biological_process	0.0036545	0.24009	9	361	133	15035	ENSGALG00000015332,ENSGALG00000041122,ENSGALG00000011673,ENSGALG00000012894,ENSGALG00000009003,ENSGALG00000001693,ENSGALG00000009289,ENSGALG00000042626,ENSGALG00000004917
GO:0045778	positive regulation of ossification	biological_process	0.0036696	0.24029	6	361	63	15035	ENSGALG00000040276,ENSGALG00000011347,ENSGALG00000043555,ENSGALG00000014716,ENSGALG00000006453,ENSGALG00000014686
GO:0007162	negative regulation of cell adhesion	biological_process	0.0037745	0.24579	10	361	156	15035	ENSGALG00000008306,ENSGALG00000026137,ENSGALG00000053601,ENSGALG00000041555,ENSGALG00000009626,ENSGALG00000011347,ENSGALG00000036142,ENSGALG00000014786,ENSGALG00000004526,ENSGALG00000036189
GO:0030308	negative regulation of cell growth	biological_process	0.0037907	0.24579	8	361	106	15035	ENSGALG00000038364,ENSGALG00000033520,ENSGALG00000004526,ENSGALG00000011347,ENSGALG00000026137,ENSGALG00000004285,ENSGALG00000007047,ENSGALG00000012613
GO:0015293	symporter activity	molecular_function	0.0038028	0.24579	7	361	85	15035	ENSGALG00000040541,ENSGALG00000041932,ENSGALG00000016804,ENSGALG00000009289,ENSGALG00000017216,ENSGALG00000003560,ENSGALG00000001693
GO:0016486	peptide hormone processing	biological_process	0.0038034	0.24579	3	361	14	15035	ENSGALG00000033256,ENSGALG00000031343,ENSGALG00000009725
GO:0051223	regulation of protein transport	biological_process	0.003834	0.24696	17	361	345	15035	ENSGALG00000004285,ENSGALG00000041640,ENSGALG00000006413,ENSGALG00000030545,ENSGALG00000028770,ENSGALG00000038364,ENSGALG00000004833,ENSGALG00000016785,ENSGALG00000036497,ENSGALG00000011104,ENSGALG00000010820,ENSGALG00000023521,ENSGALG00000042626,ENSGALG00000013616,ENSGALG00000014786,ENSGALG00000010179,ENSGALG00000004917
GO:0043025	neuronal cell body	cellular_component	0.0038558	0.24756	11	361	182	15035	ENSGALG00000042626,ENSGALG00000002015,ENSGALG00000039690,ENSGALG00000003560,ENSGALG00000032415,ENSGALG00000010331,ENSGALG00000014716,ENSGALG00000000653,ENSGALG00000007047,ENSGALG00000016804,ENSGALG00000042308
GO:0030659	cytoplasmic vesicle membrane	cellular_component	0.0039176	0.25072	11	361	182	15035	ENSGALG00000053549,ENSGALG00000014997,ENSGALG00000040045,ENSGALG00000042626,ENSGALG00000009289,ENSGALG00000001693,ENSGALG00000006413,ENSGALG00000014967,ENSGALG00000028602,ENSGALG00000041122,ENSGALG00000004184
GO:0071310	cellular response to organic substance	biological_process	0.0039745	0.25289	50	361	1436	15035	ENSGALG00000049551,ENSGALG00000004285,ENSGALG00000007959,ENSGALG00000023542,ENSGALG00000029836,ENSGALG00000036497,ENSGALG00000033520,ENSGALG00000047554,ENSGALG00000009626,ENSGALG00000041555,ENSGALG00000012894,ENSGALG00000030607,ENSGALG00000003003,ENSGALG00000006453,ENSGALG00000014716,ENSGALG00000012801,ENSGALG00000014786,ENSGALG00000008177,ENSGALG00000010331,ENSGALG00000017050,ENSGALG00000004593,…
GO:0051043	regulation of membrane protein ectodomain proteolysis	biological_process	0.0039828	0.25289	3	361	14	15035	ENSGALG00000053549,ENSGALG00000023521,ENSGALG00000029836
GO:0007271	synaptic transmission, cholinergic	biological_process	0.0039935	0.25289	3	361	14	15035	ENSGALG00000003014,ENSGALG00000003005,ENSGALG00000016804
GO:1903532	positive regulation of secretion by cell	biological_process	0.0040028	0.25289	11	361	181	15035	ENSGALG00000016785,ENSGALG00000004917,ENSGALG00000036497,ENSGALG00000028770,ENSGALG00000003560,ENSGALG00000042626,ENSGALG00000041640,ENSGALG00000016480,ENSGALG00000007047,ENSGALG00000038241,ENSGALG00000011104
GO:0031639	plasminogen activation	biological_process	0.0040605	0.25572	3	361	14	15035	ENSGALG00000002987,ENSGALG00000009626,ENSGALG00000005086
GO:0046872	metal ion binding	molecular_function	0.0040788	0.25606	68	361	2100	15035	ENSGALG00000029298,ENSGALG00000011181,ENSGALG00000012121,ENSGALG00000004917,ENSGALG00000008177,ENSGALG00000040045,ENSGALG00000010331,ENSGALG00000006453,ENSGALG00000001407,ENSGALG00000025764,ENSGALG00000009626,ENSGALG00000011347,ENSGALG00000029354,ENSGALG00000015833,ENSGALG00000015721,ENSGALG00000009004,ENSGALG00000012802,ENSGALG00000011740,ENSGALG00000004285,ENSGALG00000040463,ENSGALG00000009601,…
GO:0006955	immune response	biological_process	0.0041285	0.25835	28	361	680	15035	ENSGALG00000029836,ENSGALG00000008306,XLOC_033031,ENSGALG00000051054,ENSGALG00000049551,ENSGALG00000034150,ENSGALG00000013956,ENSGALG00000009626,ENSGALG00000054196,ENSGALG00000010915,ENSGALG00000016785,ENSGALG00000003589,ENSGALG00000027973,ENSGALG00000006453,ENSGALG00000003547,ENSGALG00000012456,ENSGALG00000010820,ENSGALG00000003003,ENSGALG00000053601,ENSGALG00000009179,ENSGALG00000000731,ENSGALG…
GO:1901682	sulfur compound transmembrane transporter activity	molecular_function	0.004207	0.26212	4	361	28	15035	ENSGALG00000000745,ENSGALG00000027423,ENSGALG00000007959,ENSGALG00000033638
GO:0050727	regulation of inflammatory response	biological_process	0.0042151	0.26212	10	361	156	15035	ENSGALG00000033974,ENSGALG00000000168,ENSGALG00000015833,ENSGALG00000038364,ENSGALG00000012481,ENSGALG00000037522,ENSGALG00000016785,ENSGALG00000053549,ENSGALG00000027786,ENSGALG00000026098
GO:0050432	catecholamine secretion	biological_process	0.0042589	0.26394	4	361	28	15035	ENSGALG00000010820,ENSGALG00000038241,ENSGALG00000042626,ENSGALG00000002015
GO:0040017	positive regulation of locomotion	biological_process	0.004271	0.26394	16	361	323	15035	ENSGALG00000004184,ENSGALG00000003589,ENSGALG00000016713,ENSGALG00000023521,ENSGALG00000029819,ENSGALG00000012456,ENSGALG00000003003,ENSGALG00000053549,ENSGALG00000014786,ENSGALG00000006992,ENSGALG00000033974,ENSGALG00000029836,ENSGALG00000041640,ENSGALG00000009626,ENSGALG00000006413,ENSGALG00000041555
GO:0030335	positive regulation of cell migration	biological_process	0.0043577	0.26846	15	361	295	15035	ENSGALG00000014786,ENSGALG00000053549,ENSGALG00000006413,ENSGALG00000041555,ENSGALG00000009626,ENSGALG00000012456,ENSGALG00000003003,ENSGALG00000023521,ENSGALG00000041640,ENSGALG00000016713,ENSGALG00000003589,ENSGALG00000029836,ENSGALG00000033974,ENSGALG00000004184,ENSGALG00000006992
GO:0001568	blood vessel development	biological_process	0.0044782	0.27502	19	361	415	15035	ENSGALG00000011200,ENSGALG00000006343,ENSGALG00000038364,ENSGALG00000036497,ENSGALG00000043754,ENSGALG00000041555,ENSGALG00000016945,ENSGALG00000033256,ENSGALG00000009626,ENSGALG00000011347,ENSGALG00000002987,ENSGALG00000006821,ENSGALG00000029836,ENSGALG00000036189,ENSGALG00000053549,ENSGALG00000026098,ENSGALG00000029819,ENSGALG00000004184,ENSGALG00000036798
GO:0030217	T cell differentiation	biological_process	0.0045371	0.27778	10	361	157	15035	ENSGALG00000008306,ENSGALG00000040276,ENSGALG00000011347,ENSGALG00000013956,ENSGALG00000036142,ENSGALG00000003670,ENSGALG00000034975,ENSGALG00000010915,ENSGALG00000053549,ENSGALG00000036497
GO:0051346	negative regulation of hydrolase activity	biological_process	0.004649	0.28375	13	361	237	15035	ENSGALG00000006992,ENSGALG00000008660,ENSGALG00000003589,ENSGALG00000006453,ENSGALG00000033974,ENSGALG00000019552,ENSGALG00000011214,ENSGALG00000002987,ENSGALG00000012872,ENSGALG00000009349,ENSGALG00000009626,ENSGALG00000008177,ENSGALG00000029354
GO:2000145	regulation of cell motility	biological_process	0.0047838	0.29107	23	361	542	15035	ENSGALG00000000364,ENSGALG00000041640,ENSGALG00000029836,ENSGALG00000033974,ENSGALG00000006992,ENSGALG00000003521,ENSGALG00000008945,ENSGALG00000038364,ENSGALG00000043754,ENSGALG00000041555,ENSGALG00000006413,ENSGALG00000009626,ENSGALG00000012456,ENSGALG00000003003,ENSGALG00000003034,ENSGALG00000023521,ENSGALG00000016713,ENSGALG00000003589,ENSGALG00000004184,ENSGALG00000000168,ENSGALG00000014786,…
GO:0006029	proteoglycan metabolic process	biological_process	0.0048186	0.29229	6	361	67	15035	ENSGALG00000030607,ENSGALG00000031058,ENSGALG00000024056,ENSGALG00000001371,ENSGALG00000011347,ENSGALG00000004593
GO:0007169	transmembrane receptor protein tyrosine kinase signaling pathway	biological_process	0.0048445	0.29297	18	361	387	15035	ENSGALG00000006992,ENSGALG00000029836,ENSGALG00000033974,ENSGALG00000007358,ENSGALG00000006821,ENSGALG00000049157,ENSGALG00000015495,ENSGALG00000005707,ENSGALG00000009626,ENSGALG00000016296,ENSGALG00000040672,ENSGALG00000036798,ENSGALG00000040276,ENSGALG00000023521,ENSGALG00000004593,ENSGALG00000027786,ENSGALG00000014786,ENSGALG00000036189
GO:0048522	positive regulation of cellular process	biological_process	0.0049315	0.29732	99	361	3284	15035	ENSGALG00000002987,ENSGALG00000028770,ENSGALG00000039209,ENSGALG00000016296,ENSGALG00000006992,ENSGALG00000010036,ENSGALG00000041640,ENSGALG00000031997,ENSGALG00000003670,ENSGALG00000015150,ENSGALG00000053549,ENSGALG00000012321,ENSGALG00000003589,ENSGALG00000040276,ENSGALG00000012456,ENSGALG00000014768,ENSGALG00000023521,ENSGALG00000042308,ENSGALG00000041555,ENSGALG00000009626,ENSGALG00000011347,…
GO:0002062	chondrocyte differentiation	biological_process	0.0050078	0.30022	7	361	89	15035	ENSGALG00000011347,ENSGALG00000004593,ENSGALG00000011214,ENSGALG00000043064,ENSGALG00000040276,ENSGALG00000038364,ENSGALG00000030607
GO:0072675	osteoclast fusion	biological_process	0.00501	0.30022	2	361	5	15035	ENSGALG00000037522,ENSGALG00000033520
GO:0032095	regulation of response to food	biological_process	0.0050505	0.30174	3	361	15	15035	ENSGALG00000013616,ENSGALG00000011104,ENSGALG00000038241
GO:0032026	response to magnesium ion	biological_process	0.0051211	0.30503	2	361	5	15035	ENSGALG00000009626,ENSGALG00000012613
GO:0060291	long-term synaptic potentiation	biological_process	0.0051568	0.30623	5	361	48	15035	ENSGALG00000009003,ENSGALG00000000909,ENSGALG00000010331,ENSGALG00000026903,ENSGALG00000004526
GO:0034766	negative regulation of ion transmembrane transport	biological_process	0.0051931	0.30747	5	361	47	15035	ENSGALG00000006992,ENSGALG00000032506,ENSGALG00000009626,ENSGALG00000041640,ENSGALG00000048923
GO:0060346	bone trabecula formation	biological_process	0.0052763	0.31146	2	361	5	15035	ENSGALG00000014686,ENSGALG00000041555
GO:0035095	behavioral response to nicotine	biological_process	0.0053217	0.3132	2	361	5	15035	ENSGALG00000003005,ENSGALG00000003014
GO:0031401	positive regulation of protein modification process	biological_process	0.0053642	0.31477	29	361	737	15035	ENSGALG00000040672,ENSGALG00000028770,ENSGALG00000036497,ENSGALG00000016296,ENSGALG00000006413,ENSGALG00000009626,ENSGALG00000043555,ENSGALG00000013956,ENSGALG00000002766,ENSGALG00000002987,ENSGALG00000054196,ENSGALG00000047554,ENSGALG00000049157,ENSGALG00000049551,ENSGALG00000000607,ENSGALG00000033974,ENSGALG00000006992,ENSGALG00000008177,ENSGALG00000012321,ENSGALG00000053549,ENSGALG00000043662,…
GO:0050709	negative regulation of protein secretion	biological_process	0.0054237	0.31572	6	361	68	15035	ENSGALG00000042626,ENSGALG00000013616,ENSGALG00000023521,ENSGALG00000038364,ENSGALG00000028770,ENSGALG00000010820
GO:0050829	defense response to Gram-negative bacterium	biological_process	0.0054534	0.31572	4	361	29	15035	ENSGALG00000006453,ENSGALG00000027973,ENSGALG00000034150,ENSGALG00000010820
GO:0045055	regulated exocytosis	biological_process	0.0054663	0.31572	9	361	139	15035	ENSGALG00000012894,ENSGALG00000010820,ENSGALG00000048923,ENSGALG00000011673,ENSGALG00000012456,ENSGALG00000015332,ENSGALG00000004917,ENSGALG00000042626,ENSGALG00000009003
GO:0009888	tissue development	biological_process	0.0055114	0.31572	42	361	1182	15035	ENSGALG00000006775,ENSGALG00000037522,ENSGALG00000036142,ENSGALG00000015908,ENSGALG00000042308,ENSGALG00000003589,ENSGALG00000036798,ENSGALG00000040276,ENSGALG00000019312,ENSGALG00000015253,ENSGALG00000038364,ENSGALG00000043555,ENSGALG00000031112,ENSGALG00000010036,ENSGALG00000007047,ENSGALG00000006821,ENSGALG00000014686,ENSGALG00000031997,ENSGALG00000041640,ENSGALG00000033974,ENSGALG00000006992,…
GO:0006952	defense response	biological_process	0.0055123	0.31572	26	361	631	15035	ENSGALG00000027786,ENSGALG00000026098,ENSGALG00000043064,ENSGALG00000036142,ENSGALG00000012481,ENSGALG00000032348,ENSGALG00000037522,ENSGALG00000053549,ENSGALG00000027973,ENSGALG00000006453,ENSGALG00000003547,ENSGALG00000000168,ENSGALG00000010820,ENSGALG00000003003,ENSGALG00000039461,ENSGALG00000009626,ENSGALG00000054196,ENSGALG00000015833,ENSGALG00000038364,ENSGALG00000016785,ENSGALG00000010915,…
GO:1901343	negative regulation of vasculature development	biological_process	0.0055132	0.31572	6	361	69	15035	ENSGALG00000016945,ENSGALG00000004184,ENSGALG00000009626,ENSGALG00000006821,ENSGALG00000011200,ENSGALG00000036189
GO:0051924	regulation of calcium ion transport	biological_process	0.005515	0.31572	8	361	115	15035	ENSGALG00000048923,ENSGALG00000000364,ENSGALG00000002893,ENSGALG00000011104,ENSGALG00000008177,ENSGALG00000038405,ENSGALG00000006413,ENSGALG00000032506
GO:0002102	podosome	cellular_component	0.005527	0.31572	3	361	16	15035	ENSGALG00000053549,ENSGALG00000053601,ENSGALG00000037929
GO:0051047	positive regulation of secretion	biological_process	0.0055292	0.31572	11	361	189	15035	ENSGALG00000042626,ENSGALG00000003560,ENSGALG00000016785,ENSGALG00000004917,ENSGALG00000036497,ENSGALG00000028770,ENSGALG00000038241,ENSGALG00000011104,ENSGALG00000041640,ENSGALG00000016480,ENSGALG00000007047
GO:0051917	regulation of fibrinolysis	biological_process	0.0055401	0.31572	2	361	5	15035	ENSGALG00000002987,ENSGALG00000009626
GO:0034481	chondroitin sulfotransferase activity	molecular_function	0.0056327	0.32007	2	361	5	15035	ENSGALG00000024056,ENSGALG00000030607
GO:0002292	T cell differentiation involved in immune response	biological_process	0.0057166	0.32318	4	361	31	15035	ENSGALG00000010915,ENSGALG00000036142,ENSGALG00000013956,ENSGALG00000008306
GO:0097449	astrocyte projection	cellular_component	0.00572	0.32318	2	361	5	15035	ENSGALG00000000909,ENSGALG00000042626
GO:0072540	T-helper 17 cell lineage commitment	biological_process	0.0057562	0.32428	2	361	5	15035	ENSGALG00000010915,ENSGALG00000036142
GO:2000117	negative regulation of cysteine-type endopeptidase activity	biological_process	0.0057723	0.32428	5	361	48	15035	ENSGALG00000006453,ENSGALG00000009626,ENSGALG00000033974,ENSGALG00000006992,ENSGALG00000008660
GO:0022603	regulation of anatomical structure morphogenesis	biological_process	0.0058432	0.32619	25	361	616	15035	ENSGALG00000000653,ENSGALG00000004285,ENSGALG00000006821,ENSGALG00000007047,ENSGALG00000041640,ENSGALG00000011242,ENSGALG00000033974,ENSGALG00000008614,ENSGALG00000003521,ENSGALG00000033520,ENSGALG00000011200,ENSGALG00000004526,ENSGALG00000043754,ENSGALG00000011347,ENSGALG00000009626,ENSGALG00000016945,ENSGALG00000047554,ENSGALG00000031112,ENSGALG00000042308,ENSGALG00000004184,ENSGALG00000040276,…
GO:0006950	response to stress	biological_process	0.0058657	0.32619	65	361	2004	15035	ENSGALG00000000168,ENSGALG00000006453,ENSGALG00000038241,ENSGALG00000015105,ENSGALG00000010820,ENSGALG00000016480,ENSGALG00000026098,ENSGALG00000043064,ENSGALG00000029298,ENSGALG00000008177,ENSGALG00000040045,ENSGALG00000012481,ENSGALG00000012802,ENSGALG00000000607,ENSGALG00000004285,ENSGALG00000003560,ENSGALG00000009626,ENSGALG00000043754,ENSGALG00000040038,ENSGALG00000015833,ENSGALG00000054783,…
GO:0015081	sodium ion transmembrane transporter activity	molecular_function	0.0058729	0.32619	8	361	116	15035	ENSGALG00000041932,ENSGALG00000009289,ENSGALG00000003560,ENSGALG00000001693,ENSGALG00000016804,ENSGALG00000040541,ENSGALG00000017216,ENSGALG00000011040
GO:0016782	transferase activity, transferring sulfur-containing groups	molecular_function	0.0058981	0.32619	6	361	68	15035	ENSGALG00000047475,ENSGALG00000006440,ENSGALG00000030607,ENSGALG00000031058,ENSGALG00000001371,ENSGALG00000024056
GO:0031629	synaptic vesicle fusion to presynaptic active zone membrane	biological_process	0.0059179	0.32619	3	361	16	15035	ENSGALG00000011673,ENSGALG00000015332,ENSGALG00000009003
GO:0007188	adenylate cyclase-modulating G-protein coupled receptor signaling pathway	biological_process	0.0059318	0.32619	9	361	138	15035	ENSGALG00000013616,ENSGALG00000008177,ENSGALG00000011104,ENSGALG00000003163,ENSGALG00000012396,ENSGALG00000010820,ENSGALG00000012894,ENSGALG00000023521,ENSGALG00000000607
GO:0097060	synaptic membrane	cellular_component	0.0059514	0.32619	11	361	198	15035	ENSGALG00000000653,ENSGALG00000011673,ENSGALG00000041225,ENSGALG00000003014,ENSGALG00000012894,ENSGALG00000015089,ENSGALG00000036925,ENSGALG00000003005,ENSGALG00000009003,ENSGALG00000003560,ENSGALG00000016905
GO:0002430	complement receptor mediated signaling pathway	biological_process	0.0059535	0.32619	2	361	5	15035	ENSGALG00000029836,ENSGALG00000032348
GO:2000147	positive regulation of cell motility	biological_process	0.0059547	0.32619	15	361	305	15035	ENSGALG00000041640,ENSGALG00000023521,ENSGALG00000016713,ENSGALG00000003003,ENSGALG00000012456,ENSGALG00000006992,ENSGALG00000003589,ENSGALG00000029836,ENSGALG00000033974,ENSGALG00000004184,ENSGALG00000053549,ENSGALG00000014786,ENSGALG00000006413,ENSGALG00000041555,ENSGALG00000009626
GO:0030166	proteoglycan biosynthetic process	biological_process	0.0060886	0.33215	5	361	50	15035	ENSGALG00000030607,ENSGALG00000031058,ENSGALG00000001371,ENSGALG00000024056,ENSGALG00000011347
GO:0031406	carboxylic acid binding	molecular_function	0.0060971	0.33215	8	361	114	15035	ENSGALG00000012481,ENSGALG00000004833,ENSGALG00000038405,ENSGALG00000006413,ENSGALG00000043064,ENSGALG00000004285,ENSGALG00000032453,ENSGALG00000015624
GO:0044459	plasma membrane part	cellular_component	0.0065034	0.35331	53	361	1599	15035	ENSGALG00000007305,ENSGALG00000007959,ENSGALG00000011040,ENSGALG00000003521,ENSGALG00000000653,ENSGALG00000011673,ENSGALG00000000745,ENSGALG00000009626,ENSGALG00000009003,ENSGALG00000037929,ENSGALG00000003560,ENSGALG00000031343,ENSGALG00000040038,ENSGALG00000038405,ENSGALG00000014716,ENSGALG00000038543,ENSGALG00000037285,ENSGALG00000036925,ENSGALG00000007620,ENSGALG00000016480,ENSGALG00000041225,…
GO:0031589	cell-substrate adhesion	biological_process	0.006536	0.35411	12	361	225	15035	ENSGALG00000042079,ENSGALG00000036189,ENSGALG00000014786,ENSGALG00000015253,ENSGALG00000041555,ENSGALG00000009626,ENSGALG00000043555,ENSGALG00000051882,ENSGALG00000026137,ENSGALG00000012456,ENSGALG00000003589,ENSGALG00000040857
GO:0040012	regulation of locomotion	biological_process	0.0065572	0.35428	24	361	589	15035	ENSGALG00000036189,ENSGALG00000053549,ENSGALG00000014786,ENSGALG00000003589,ENSGALG00000004184,ENSGALG00000000168,ENSGALG00000003003,ENSGALG00000012456,ENSGALG00000029819,ENSGALG00000003034,ENSGALG00000023521,ENSGALG00000016713,ENSGALG00000041555,ENSGALG00000006413,ENSGALG00000009626,ENSGALG00000038364,ENSGALG00000043754,ENSGALG00000029836,ENSGALG00000033974,ENSGALG00000003521,ENSGALG00000006992,…
GO:0051272	positive regulation of cellular component movement	biological_process	0.0066599	0.35886	15	361	309	15035	ENSGALG00000006992,ENSGALG00000004184,ENSGALG00000033974,ENSGALG00000029836,ENSGALG00000003589,ENSGALG00000016713,ENSGALG00000023521,ENSGALG00000041640,ENSGALG00000012456,ENSGALG00000003003,ENSGALG00000009626,ENSGALG00000041555,ENSGALG00000006413,ENSGALG00000053549,ENSGALG00000014786
GO:0031644	regulation of neurological system process	biological_process	0.006696	0.35982	5	361	52	15035	ENSGALG00000004526,ENSGALG00000003005,ENSGALG00000008660,ENSGALG00000000168,ENSGALG00000038241
GO:0060351	cartilage development involved in endochondral bone morphogenesis	biological_process	0.0067152	0.35987	4	361	32	15035	ENSGALG00000011347,ENSGALG00000041555,ENSGALG00000011214,ENSGALG00000000364
GO:0002792	negative regulation of peptide secretion	biological_process	0.0067864	0.3627	6	361	71	15035	ENSGALG00000042626,ENSGALG00000013616,ENSGALG00000023521,ENSGALG00000028770,ENSGALG00000038364,ENSGALG00000010820
GO:0031338	regulation of vesicle fusion	biological_process	0.0068081	0.36289	3	361	17	15035	ENSGALG00000004917,ENSGALG00000042626,ENSGALG00000015332
GO:0018149	peptide cross-linking	biological_process	0.0068748	0.36545	3	361	17	15035	ENSGALG00000009626,ENSGALG00000006775,ENSGALG00000012802
GO:0001944	vasculature development	biological_process	0.0069484	0.36838	19	361	433	15035	ENSGALG00000029836,ENSGALG00000006821,ENSGALG00000002987,ENSGALG00000009626,ENSGALG00000011347,ENSGALG00000016945,ENSGALG00000041555,ENSGALG00000033256,ENSGALG00000036497,ENSGALG00000043754,ENSGALG00000006343,ENSGALG00000038364,ENSGALG00000011200,ENSGALG00000036798,ENSGALG00000004184,ENSGALG00000029819,ENSGALG00000026098,ENSGALG00000036189,ENSGALG00000053549
GO:0007588	excretion	biological_process	0.0070767	0.3734	3	361	17	15035	ENSGALG00000003014,ENSGALG00000003005,ENSGALG00000000364
GO:0030098	lymphocyte differentiation	biological_process	0.0070809	0.3734	12	361	221	15035	ENSGALG00000040276,ENSGALG00000008306,ENSGALG00000036497,ENSGALG00000014786,ENSGALG00000053549,ENSGALG00000010915,ENSGALG00000034975,ENSGALG00000003670,ENSGALG00000036142,ENSGALG00000015495,ENSGALG00000013956,ENSGALG00000011347
GO:0099500	vesicle fusion to plasma membrane	biological_process	0.0071487	0.37551	3	361	17	15035	ENSGALG00000015332,ENSGALG00000009003,ENSGALG00000011673
GO:0072001	renal system development	biological_process	0.0071845	0.37551	11	361	197	15035	ENSGALG00000042079,ENSGALG00000036497,ENSGALG00000014944,ENSGALG00000010331,ENSGALG00000006343,ENSGALG00000004593,ENSGALG00000005707,ENSGALG00000043555,ENSGALG00000033256,ENSGALG00000036798,ENSGALG00000006992
GO:0032104	regulation of response to extracellular stimulus	biological_process	0.0071968	0.37551	3	361	17	15035	ENSGALG00000038241,ENSGALG00000011104,ENSGALG00000013616
GO:0032107	regulation of response to nutrient levels	biological_process	0.0071968	0.37551	3	361	17	15035	ENSGALG00000011104,ENSGALG00000038241,ENSGALG00000013616
GO:0032836	glomerular basement membrane development	biological_process	0.0073072	0.38027	2	361	6	15035	ENSGALG00000004593,ENSGALG00000042079
GO:0072674	multinuclear osteoclast differentiation	biological_process	0.0073976	0.38283	2	361	6	15035	ENSGALG00000037522,ENSGALG00000033520
GO:1903531	negative regulation of secretion by cell	biological_process	0.0073992	0.38283	7	361	95	15035	ENSGALG00000013616,ENSGALG00000042626,ENSGALG00000023521,ENSGALG00000048923,ENSGALG00000010820,ENSGALG00000028770,ENSGALG00000038364
GO:0035860	glial cell-derived neurotrophic factor receptor signaling pathway	biological_process	0.0074145	0.38283	2	361	6	15035	ENSGALG00000016296,ENSGALG00000004593
GO:0010692	regulation of alkaline phosphatase activity	biological_process	0.00747	0.38468	2	361	6	15035	ENSGALG00000043555,ENSGALG00000011347
GO:0072358	cardiovascular system development	biological_process	0.0075899	0.3897	19	361	437	15035	ENSGALG00000004184,ENSGALG00000036798,ENSGALG00000029819,ENSGALG00000026098,ENSGALG00000036189,ENSGALG00000053549,ENSGALG00000029836,ENSGALG00000006821,ENSGALG00000011347,ENSGALG00000009626,ENSGALG00000033256,ENSGALG00000041555,ENSGALG00000016945,ENSGALG00000002987,ENSGALG00000038364,ENSGALG00000006343,ENSGALG00000011200,ENSGALG00000043754,ENSGALG00000036497
GO:0030133	transport vesicle	cellular_component	0.0076068	0.3897	10	361	172	15035	ENSGALG00000014967,ENSGALG00000011673,ENSGALG00000014726,ENSGALG00000041122,ENSGALG00000032958,ENSGALG00000010331,ENSGALG00000009289,ENSGALG00000042626,ENSGALG00000001693,ENSGALG00000009003
GO:0046888	negative regulation of hormone secretion	biological_process	0.0076547	0.39114	4	361	33	15035	ENSGALG00000023521,ENSGALG00000010820,ENSGALG00000028770,ENSGALG00000038364
GO:0009966	regulation of signal transduction	biological_process	0.0077365	0.3943	58	361	1785	15035	ENSGALG00000030140,ENSGALG00000010386,ENSGALG00000004593,ENSGALG00000040045,ENSGALG00000008177,ENSGALG00000014786,ENSGALG00000012801,ENSGALG00000006453,ENSGALG00000038241,ENSGALG00000014716,ENSGALG00000003003,ENSGALG00000029819,ENSGALG00000030607,ENSGALG00000053601,ENSGALG00000041555,ENSGALG00000005707,ENSGALG00000009626,ENSGALG00000011347,ENSGALG00000047554,ENSGALG00000049157,ENSGALG00000040672,…
GO:0042738	exogenous drug catabolic process	biological_process	0.0078022	0.39663	3	361	17	15035	ENSGALG00000008283,ENSGALG00000008178,ENSGALG00000008177
GO:0050728	negative regulation of inflammatory response	biological_process	0.0078715	0.39913	6	361	73	15035	ENSGALG00000000168,ENSGALG00000033974,ENSGALG00000027786,ENSGALG00000015833,ENSGALG00000012481,ENSGALG00000038364
GO:0022804	active transmembrane transporter activity	molecular_function	0.0079567	0.40241	13	361	256	15035	ENSGALG00000007959,ENSGALG00000017216,XLOC_023902,ENSGALG00000000745,ENSGALG00000040541,ENSGALG00000016804,ENSGALG00000030545,ENSGALG00000009289,ENSGALG00000003560,ENSGALG00000033638,ENSGALG00000001693,ENSGALG00000041932,ENSGALG00000027423
GO:0019935	cyclic-nucleotide-mediated signaling	biological_process	0.0080189	0.40427	8	361	120	15035	ENSGALG00000011104,ENSGALG00000012396,ENSGALG00000010820,ENSGALG00000007047,ENSGALG00000023521,ENSGALG00000009626,ENSGALG00000013616,ENSGALG00000008177
GO:0048485	sympathetic nervous system development	biological_process	0.0080343	0.40427	3	361	18	15035	ENSGALG00000007620,ENSGALG00000036497,ENSGALG00000042308
GO:0048701	embryonic cranial skeleton morphogenesis	biological_process	0.0081189	0.40749	4	361	34	15035	ENSGALG00000040276,ENSGALG00000041640,ENSGALG00000030607,ENSGALG00000032031
GO:0007269	neurotransmitter secretion	biological_process	0.0082646	0.41125	7	361	100	15035	ENSGALG00000011673,ENSGALG00000004917,ENSGALG00000012894,ENSGALG00000015332,ENSGALG00000009003,ENSGALG00000002015,ENSGALG00000042626
GO:0099643	signal release from synapse	biological_process	0.0082646	0.41125	7	361	100	15035	ENSGALG00000012894,ENSGALG00000004917,ENSGALG00000011673,ENSGALG00000002015,ENSGALG00000042626,ENSGALG00000009003,ENSGALG00000015332
GO:0002295	T-helper cell lineage commitment	biological_process	0.0082841	0.41125	2	361	6	15035	ENSGALG00000036142,ENSGALG00000010915
GO:0043373	CD4-positive, alpha-beta T cell lineage commitment	biological_process	0.0082841	0.41125	2	361	6	15035	ENSGALG00000036142,ENSGALG00000010915
GO:0005138	interleukin-6 receptor binding	molecular_function	0.0082979	0.41125	2	361	6	15035	ENSGALG00000014716,ENSGALG00000010915
GO:0060390	regulation of SMAD protein signal transduction	biological_process	0.0083302	0.41172	3	361	18	15035	ENSGALG00000036001,ENSGALG00000007358,ENSGALG00000038364
GO:0005577	fibrinogen complex	cellular_component	0.0083811	0.41172	2	361	6	15035	ENSGALG00000009626,ENSGALG00000002987
GO:0005604	basement membrane	cellular_component	0.0083873	0.41172	5	361	55	15035	ENSGALG00000011200,ENSGALG00000034119,ENSGALG00000042079,ENSGALG00000043555,ENSGALG00000036798
GO:0009719	response to endogenous stimulus	biological_process	0.0083905	0.41172	32	361	864	15035	ENSGALG00000015150,ENSGALG00000041932,ENSGALG00000036001,ENSGALG00000027786,ENSGALG00000023521,ENSGALG00000002289,ENSGALG00000003547,ENSGALG00000040276,ENSGALG00000036798,ENSGALG00000019312,ENSGALG00000028770,ENSGALG00000043555,ENSGALG00000031112,ENSGALG00000039690,ENSGALG00000014686,ENSGALG00000031997,ENSGALG00000007358,ENSGALG00000012396,ENSGALG00000017050,ENSGALG00000008177,ENSGALG00000014786,…
GO:0017156	calcium ion regulated exocytosis	biological_process	0.0084164	0.41196	7	361	99	15035	ENSGALG00000048923,ENSGALG00000011673,ENSGALG00000004917,ENSGALG00000012894,ENSGALG00000015332,ENSGALG00000009003,ENSGALG00000042626
GO:0002604	regulation of dendritic cell antigen processing and presentation	biological_process	0.008471	0.41362	2	361	6	15035	ENSGALG00000008306,ENSGALG00000009626
GO:0010955	negative regulation of protein processing	biological_process	0.008531	0.41374	3	361	18	15035	ENSGALG00000008660,ENSGALG00000002987,ENSGALG00000009626
GO:1903318	negative regulation of protein maturation	biological_process	0.008531	0.41374	3	361	18	15035	ENSGALG00000009626,ENSGALG00000008660,ENSGALG00000002987
GO:0070405	ammonium ion binding	molecular_function	0.0085573	0.41374	5	361	52	15035	ENSGALG00000003014,ENSGALG00000003005,ENSGALG00000012092,ENSGALG00000016804,ENSGALG00000017216
GO:0001786	phosphatidylserine binding	molecular_function	0.0085659	0.41374	4	361	35	15035	ENSGALG00000042626,ENSGALG00000009626,ENSGALG00000002121,ENSGALG00000010331
GO:0035108	limb morphogenesis	biological_process	0.008585	0.41374	8	361	122	15035	ENSGALG00000033256,ENSGALG00000011347,ENSGALG00000036497,ENSGALG00000031343,ENSGALG00000040276,ENSGALG00000041640,ENSGALG00000014686,ENSGALG00000030607
GO:0071880	adenylate cyclase-activating adrenergic receptor signaling pathway	biological_process	0.008599	0.41374	3	361	18	15035	ENSGALG00000010820,ENSGALG00000008177,ENSGALG00000023521
GO:0043177	organic acid binding	molecular_function	0.0087391	0.4187	8	361	121	15035	ENSGALG00000038405,ENSGALG00000012481,ENSGALG00000004833,ENSGALG00000043064,ENSGALG00000006413,ENSGALG00000032453,ENSGALG00000004285,ENSGALG00000015624
GO:1901386	negative regulation of voltage-gated calcium channel activity	biological_process	0.0087445	0.4187	2	361	6	15035	ENSGALG00000032506,ENSGALG00000048923
GO:0045926	negative regulation of growth	biological_process	0.0087928	0.41987	9	361	148	15035	ENSGALG00000004285,ENSGALG00000026137,ENSGALG00000007047,ENSGALG00000002893,ENSGALG00000012613,ENSGALG00000011347,ENSGALG00000033520,ENSGALG00000038364,ENSGALG00000004526
GO:1902106	negative regulation of leukocyte differentiation	biological_process	0.0088287	0.41987	5	361	53	15035	ENSGALG00000036142,ENSGALG00000003670,ENSGALG00000011347,ENSGALG00000008306,ENSGALG00000014786
GO:0048585	negative regulation of response to stimulus	biological_process	0.0088326	0.41987	35	361	972	15035	ENSGALG00000014686,ENSGALG00000031997,ENSGALG00000041640,ENSGALG00000012613,ENSGALG00000007358,ENSGALG00000006821,ENSGALG00000006992,ENSGALG00000008306,ENSGALG00000033974,ENSGALG00000016785,ENSGALG00000016296,ENSGALG00000038364,ENSGALG00000002987,ENSGALG00000023521,ENSGALG00000019312,ENSGALG00000040276,ENSGALG00000011104,ENSGALG00000036142,ENSGALG00000027786,ENSGALG00000000607,ENSGALG00000004526,…
GO:0048468	cell development	biological_process	0.0088733	0.42079	46	361	1367	15035	ENSGALG00000016905,ENSGALG00000042626,ENSGALG00000004593,ENSGALG00000011214,ENSGALG00000010331,ENSGALG00000008177,ENSGALG00000010179,ENSGALG00000014716,ENSGALG00000016480,ENSGALG00000007620,ENSGALG00000011086,ENSGALG00000030607,ENSGALG00000009003,ENSGALG00000005707,ENSGALG00000011347,ENSGALG00000047554,ENSGALG00000006343,ENSGALG00000036497,ENSGALG00000004526,ENSGALG00000008614,ENSGALG00000003521,…
GO:0001655	urogenital system development	biological_process	0.0089784	0.42362	12	361	231	15035	ENSGALG00000004593,ENSGALG00000033256,ENSGALG00000005707,ENSGALG00000043555,ENSGALG00000036497,ENSGALG00000014944,ENSGALG00000042079,ENSGALG00000006343,ENSGALG00000010331,ENSGALG00000006992,ENSGALG00000036798,ENSGALG00000036346
GO:0035107	appendage morphogenesis	biological_process	0.0089835	0.42362	8	361	123	15035	ENSGALG00000040276,ENSGALG00000030607,ENSGALG00000014686,ENSGALG00000041640,ENSGALG00000033256,ENSGALG00000011347,ENSGALG00000031343,ENSGALG00000036497
GO:0005886	plasma membrane	cellular_component	0.0089972	0.42362	84	361	2789	15035	ENSGALG00000012092,ENSGALG00000016908,ENSGALG00000016699,ENSGALG00000054770,ENSGALG00000052653,ENSGALG00000051054,ENSGALG00000002786,ENSGALG00000012396,ENSGALG00000016296,ENSGALG00000014971,ENSGALG00000008032,ENSGALG00000012456,ENSGALG00000016804,ENSGALG00000042308,ENSGALG00000054783,ENSGALG00000023521,ENSGALG00000030372,ENSGALG00000027423,ENSGALG00000053549,ENSGALG00000005502,ENSGALG00000000653,…
GO:0007492	endoderm development	biological_process	0.009114	0.42801	5	361	54	15035	ENSGALG00000003589,ENSGALG00000006992,ENSGALG00000031112,ENSGALG00000015908,ENSGALG00000015253
GO:2001023	regulation of response to drug	biological_process	0.0091338	0.42801	5	361	54	15035	ENSGALG00000002015,ENSGALG00000042626,ENSGALG00000033974,ENSGALG00000000607,ENSGALG00000007047
GO:0042379	chemokine receptor binding	molecular_function	0.0094425	0.44143	4	361	33	15035	ENSGALG00000026098,ENSGALG00000054196,ENSGALG00000049551,ENSGALG00000003003
GO:0065007	biological regulation	biological_process	0.0095309	0.44451	208	361	7787	15035	ENSGALG00000004184,ENSGALG00000039264,ENSGALG00000034831,ENSGALG00000027973,ENSGALG00000036798,ENSGALG00000014726,ENSGALG00000026903,ENSGALG00000027786,ENSGALG00000028871,ENSGALG00000009179,ENSGALG00000043662,ENSGALG00000013616,ENSGALG00000006775,ENSGALG00000048923,ENSGALG00000000299,ENSGALG00000006413,ENSGALG00000039690,ENSGALG00000002766,ENSGALG00000038364,ENSGALG00000011200,ENSGALG00000016785,…
GO:0006810	transport	biological_process	0.0095554	0.44461	90	361	3013	15035	ENSGALG00000011673,ENSGALG00000004285,ENSGALG00000028602,ENSGALG00000000653,ENSGALG00000015439,ENSGALG00000040038,ENSGALG00000019114,ENSGALG00000009289,ENSGALG00000003560,ENSGALG00000037929,ENSGALG00000041555,ENSGALG00000009626,ENSGALG00000032465,ENSGALG00000010820,ENSGALG00000016480,ENSGALG00000037285,ENSGALG00000000168,ENSGALG00000038241,ENSGALG00000038543,ENSGALG00000006453,ENSGALG00000004917,…
GO:0071356	cellular response to tumor necrosis factor	biological_process	0.009666	0.4487	7	361	99	15035	ENSGALG00000054196,ENSGALG00000043555,ENSGALG00000030140,ENSGALG00000039461,ENSGALG00000049551,ENSGALG00000003003,ENSGALG00000033520
GO:0009887	animal organ morphogenesis	biological_process	0.0097054	0.44877	26	361	670	15035	ENSGALG00000023542,ENSGALG00000003521,ENSGALG00000033974,ENSGALG00000031997,ENSGALG00000014686,ENSGALG00000041640,ENSGALG00000000364,ENSGALG00000031112,ENSGALG00000047554,ENSGALG00000043555,ENSGALG00000011347,ENSGALG00000041555,ENSGALG00000036497,ENSGALG00000015253,ENSGALG00000040432,ENSGALG00000040276,ENSGALG00000006453,ENSGALG00000030607,ENSGALG00000042308,ENSGALG00000032031,ENSGALG00000011214,…
GO:0005540	hyaluronic acid binding	molecular_function	0.0097337	0.44877	3	361	19	15035	ENSGALG00000012481,ENSGALG00000015624,ENSGALG00000006413
GO:0032098	regulation of appetite	biological_process	0.0097357	0.44877	3	361	19	15035	ENSGALG00000013616,ENSGALG00000038241,ENSGALG00000011104
GO:0005884	actin filament	cellular_component	0.009776	0.44958	6	361	78	15035	ENSGALG00000011086,ENSGALG00000040136,ENSGALG00000012456,ENSGALG00000003521,ENSGALG00000002786,ENSGALG00000015898
GO:0048710	regulation of astrocyte differentiation	biological_process	0.0098104	0.45012	3	361	19	15035	ENSGALG00000000653,ENSGALG00000000607,ENSGALG00000014716
GO:0010648	negative regulation of cell communication	biological_process	0.0098528	0.45102	30	361	806	15035	ENSGALG00000006821,ENSGALG00000031997,ENSGALG00000014686,ENSGALG00000041640,ENSGALG00000007358,ENSGALG00000012613,ENSGALG00000000607,ENSGALG00000033974,ENSGALG00000006992,ENSGALG00000014908,ENSGALG00000028770,ENSGALG00000038364,ENSGALG00000004526,ENSGALG00000016296,ENSGALG00000009626,ENSGALG00000010820,ENSGALG00000029819,ENSGALG00000023521,ENSGALG00000030607,ENSGALG00000053601,ENSGALG00000006453,…
GO:0016079	synaptic vesicle exocytosis	biological_process	0.010017	0.45746	6	361	79	15035	ENSGALG00000015332,ENSGALG00000009003,ENSGALG00000042626,ENSGALG00000011673,ENSGALG00000012894,ENSGALG00000004917
GO:0043195	terminal bouton	cellular_component	0.010053	0.45808	3	361	19	15035	ENSGALG00000001693,ENSGALG00000015332,ENSGALG00000009289
GO:0015850	organic hydroxy compound transport	biological_process	0.010077	0.45811	9	361	151	15035	ENSGALG00000001693,ENSGALG00000042626,ENSGALG00000009289,ENSGALG00000003560,ENSGALG00000002015,ENSGALG00000008177,ENSGALG00000038241,ENSGALG00000007047,ENSGALG00000010820
GO:0008467	[heparan sulfate]-glucosamine 3-sulfotransferase 1 activity	molecular_function	0.010173	0.46044	2	361	7	15035	ENSGALG00000001371,ENSGALG00000031058
GO:0017157	regulation of exocytosis	biological_process	0.010175	0.46044	8	361	128	15035	ENSGALG00000012894,ENSGALG00000048923,ENSGALG00000012456,ENSGALG00000014726,ENSGALG00000016480,ENSGALG00000015332,ENSGALG00000004917,ENSGALG00000042626
GO:0015464	acetylcholine receptor activity	molecular_function	0.010307	0.46534	3	361	19	15035	ENSGALG00000003014,ENSGALG00000003005,ENSGALG00000012894
GO:0001525	angiogenesis	biological_process	0.010398	0.46748	14	361	295	15035	ENSGALG00000036189,ENSGALG00000053549,ENSGALG00000043754,ENSGALG00000038364,ENSGALG00000011200,ENSGALG00000026098,ENSGALG00000011347,ENSGALG00000009626,ENSGALG00000016945,ENSGALG00000029819,ENSGALG00000006821,ENSGALG00000036798,ENSGALG00000004184,ENSGALG00000029836
GO:0010755	regulation of plasminogen activation	biological_process	0.010448	0.46748	2	361	7	15035	ENSGALG00000009626,ENSGALG00000002987
GO:0002551	mast cell chemotaxis	biological_process	0.010449	0.46748	2	361	7	15035	ENSGALG00000012456,ENSGALG00000010820
GO:0097531	mast cell migration	biological_process	0.010449	0.46748	2	361	7	15035	ENSGALG00000010820,ENSGALG00000012456
GO:0030574	collagen catabolic process	biological_process	0.010497	0.46857	3	361	19	15035	ENSGALG00000006992,ENSGALG00000005968,ENSGALG00000032031
GO:0023057	negative regulation of signaling	biological_process	0.010523	0.46867	30	361	810	15035	ENSGALG00000004593,ENSGALG00000042626,ENSGALG00000010386,ENSGALG00000013616,ENSGALG00000027786,ENSGALG00000030140,ENSGALG00000000168,ENSGALG00000040276,ENSGALG00000019312,ENSGALG00000006453,ENSGALG00000053601,ENSGALG00000030607,ENSGALG00000023521,ENSGALG00000029819,ENSGALG00000010820,ENSGALG00000009626,ENSGALG00000016296,ENSGALG00000004526,ENSGALG00000028770,ENSGALG00000038364,ENSGALG00000014908,…
GO:0090399	replicative senescence	biological_process	0.010604	0.47124	2	361	7	15035	ENSGALG00000010331,ENSGALG00000026137
GO:0045955	negative regulation of calcium ion-dependent exocytosis	biological_process	0.010694	0.47275	2	361	7	15035	ENSGALG00000042626,ENSGALG00000048923
GO:0004867	serine-type endopeptidase inhibitor activity	molecular_function	0.010704	0.47275	5	361	55	15035	ENSGALG00000019552,ENSGALG00000011214,ENSGALG00000002987,XLOC_033031,ENSGALG00000012872
GO:0030278	regulation of ossification	biological_process	0.01071	0.47275	8	361	127	15035	ENSGALG00000014686,ENSGALG00000041640,ENSGALG00000014716,ENSGALG00000006453,ENSGALG00000040276,ENSGALG00000015150,ENSGALG00000043555,ENSGALG00000011347
GO:0003183	mitral valve morphogenesis	biological_process	0.010791	0.47525	2	361	7	15035	ENSGALG00000041640,ENSGALG00000036497
GO:0007187	G-protein coupled receptor signaling pathway, coupled to cyclic nucleotide second messenger	biological_process	0.010871	0.47751	9	361	152	15035	ENSGALG00000003163,ENSGALG00000011104,ENSGALG00000012396,ENSGALG00000010820,ENSGALG00000000607,ENSGALG00000023521,ENSGALG00000012894,ENSGALG00000013616,ENSGALG00000008177
GO:0043687	post-translational protein modification	biological_process	0.01089	0.47751	3	361	20	15035	ENSGALG00000017234,ENSGALG00000008614,ENSGALG00000004833
GO:0007399	nervous system development	biological_process	0.010976	0.4802	46	361	1388	15035	ENSGALG00000042626,ENSGALG00000004593,ENSGALG00000016905,ENSGALG00000008177,ENSGALG00000010331,ENSGALG00000001502,ENSGALG00000008660,ENSGALG00000014716,ENSGALG00000032320,ENSGALG00000007620,ENSGALG00000009488,ENSGALG00000049157,ENSGALG00000047554,ENSGALG00000011347,ENSGALG00000005707,ENSGALG00000009003,ENSGALG00000004526,ENSGALG00000036497,ENSGALG00000030822,ENSGALG00000008614,ENSGALG00000000607,…
GO:0043408	regulation of MAPK cascade	biological_process	0.011011	0.48058	19	361	448	15035	ENSGALG00000012321,ENSGALG00000053549,ENSGALG00000043662,ENSGALG00000003003,ENSGALG00000023521,ENSGALG00000038241,ENSGALG00000011104,ENSGALG00000028770,ENSGALG00000040672,ENSGALG00000016296,ENSGALG00000043555,ENSGALG00000009626,ENSGALG00000054196,ENSGALG00000002987,ENSGALG00000049157,ENSGALG00000002766,ENSGALG00000000607,ENSGALG00000049551,ENSGALG00000033974
GO:0051234	establishment of localization	biological_process	0.011077	0.48058	92	361	3109	15035	ENSGALG00000023521,ENSGALG00000016804,ENSGALG00000002893,ENSGALG00000012456,ENSGALG00000014768,ENSGALG00000017216,ENSGALG00000003589,ENSGALG00000005502,ENSGALG00000041932,ENSGALG00000027423,ENSGALG00000031997,ENSGALG00000041640,ENSGALG00000009725,ENSGALG00000012092,ENSGALG00000041122,ENSGALG00000006992,ENSGALG00000015332,ENSGALG00000004833,ENSGALG00000028770,ENSGALG00000013090,ENSGALG00000014971,…
GO:1902725	negative regulation of satellite cell differentiation	biological_process	0.011077	0.48058	2	361	7	15035	ENSGALG00000041640,ENSGALG00000033974
GO:1900118	negative regulation of execution phase of apoptosis	biological_process	0.011082	0.48058	2	361	7	15035	ENSGALG00000042308,ENSGALG00000011104
GO:0010737	protein kinase A signaling	biological_process	0.011168	0.48324	3	361	20	15035	ENSGALG00000007047,ENSGALG00000027053,ENSGALG00000011104
GO:0071944	cell periphery	cellular_component	0.011243	0.48522	86	361	2891	15035	ENSGALG00000009003,ENSGALG00000031343,ENSGALG00000038405,ENSGALG00000009596,ENSGALG00000007959,ENSGALG00000011040,ENSGALG00000007305,ENSGALG00000003521,ENSGALG00000001559,ENSGALG00000000745,ENSGALG00000053747,ENSGALG00000042626,ENSGALG00000017234,ENSGALG00000004593,ENSGALG00000032506,ENSGALG00000016905,ENSGALG00000010386,ENSGALG00000041225,ENSGALG00000053601,ENSGALG00000012894,ENSGALG00000015089,…
GO:0031348	negative regulation of defense response	biological_process	0.011263	0.48522	7	361	102	15035	ENSGALG00000038364,ENSGALG00000012481,ENSGALG00000015833,ENSGALG00000000168,ENSGALG00000027786,ENSGALG00000033974,ENSGALG00000008306
GO:1903557	positive regulation of tumor necrosis factor superfamily cytokine production	biological_process	0.011299	0.48575	4	361	37	15035	ENSGALG00000009626,ENSGALG00000041640,ENSGALG00000014786,ENSGALG00000053549
GO:0051270	regulation of cellular component movement	biological_process	0.011325	0.48578	23	361	585	15035	ENSGALG00000043754,ENSGALG00000038364,ENSGALG00000041555,ENSGALG00000006413,ENSGALG00000009626,ENSGALG00000041640,ENSGALG00000000364,ENSGALG00000006992,ENSGALG00000003521,ENSGALG00000008945,ENSGALG00000029836,ENSGALG00000033974,ENSGALG00000053549,ENSGALG00000014786,ENSGALG00000036189,ENSGALG00000003034,ENSGALG00000023521,ENSGALG00000016713,ENSGALG00000003003,ENSGALG00000012456,ENSGALG00000000168,…
GO:0002468	dendritic cell antigen processing and presentation	biological_process	0.011429	0.48919	2	361	7	15035	ENSGALG00000008306,ENSGALG00000009626
GO:0015297	antiporter activity	molecular_function	0.01147	0.4899	5	361	57	15035	ENSGALG00000000745,ENSGALG00000027423,ENSGALG00000030545,ENSGALG00000007959,ENSGALG00000033638
GO:0060591	chondroblast differentiation	biological_process	0.01167	0.49688	2	361	7	15035	ENSGALG00000011347,ENSGALG00000040276
GO:0048514	blood vessel morphogenesis	biological_process	0.011684	0.49688	16	361	361	15035	ENSGALG00000038364,ENSGALG00000011200,ENSGALG00000043754,ENSGALG00000036497,ENSGALG00000011347,ENSGALG00000009626,ENSGALG00000016945,ENSGALG00000002987,ENSGALG00000006821,ENSGALG00000029836,ENSGALG00000036189,ENSGALG00000053549,ENSGALG00000026098,ENSGALG00000029819,ENSGALG00000004184,ENSGALG00000036798
GO:0004966	galanin receptor activity	molecular_function	0.011718	0.49725	2	361	7	15035	ENSGALG00000007047,ENSGALG00000012307
GO:0005504	fatty acid binding	molecular_function	0.011798	0.49874	3	361	20	15035	ENSGALG00000043064,ENSGALG00000004285,ENSGALG00000032453
GO:0071875	adrenergic receptor signaling pathway	biological_process	0.011823	0.49874	3	361	20	15035	ENSGALG00000023521,ENSGALG00000008177,ENSGALG00000010820
GO:0060076	excitatory synapse	cellular_component	0.011829	0.49874	3	361	21	15035	ENSGALG00000041122,ENSGALG00000036925,ENSGALG00000026903
GO:0060395	SMAD protein signal transduction	biological_process	0.011929	0.50189	5	361	58	15035	ENSGALG00000007358,ENSGALG00000028770,ENSGALG00000038364,ENSGALG00000004285,ENSGALG00000036001
GO:0007274	neuromuscular synaptic transmission	biological_process	0.012028	0.505	3	361	20	15035	ENSGALG00000003014,ENSGALG00000003005,ENSGALG00000016804
GO:0002523	leukocyte migration involved in inflammatory response	biological_process	0.012138	0.50794	2	361	7	15035	ENSGALG00000053549,ENSGALG00000026098
GO:0000165	MAPK cascade	biological_process	0.012149	0.50794	20	361	485	15035	ENSGALG00000040672,ENSGALG00000028770,ENSGALG00000016296,ENSGALG00000009626,ENSGALG00000043555,ENSGALG00000002766,ENSGALG00000049157,ENSGALG00000054196,ENSGALG00000002987,ENSGALG00000049551,ENSGALG00000000607,ENSGALG00000033974,ENSGALG00000053549,ENSGALG00000012321,ENSGALG00000043662,ENSGALG00000003003,ENSGALG00000029819,ENSGALG00000023521,ENSGALG00000011104,ENSGALG00000038241
GO:0001822	kidney development	biological_process	0.012213	0.5086	10	361	184	15035	ENSGALG00000006992,ENSGALG00000006343,ENSGALG00000010331,ENSGALG00000042079,ENSGALG00000036497,ENSGALG00000014944,ENSGALG00000043555,ENSGALG00000005707,ENSGALG00000033256,ENSGALG00000004593
GO:0003012	muscle system process	biological_process	0.012217	0.5086	11	361	213	15035	ENSGALG00000010820,ENSGALG00000000364,ENSGALG00000028721,ENSGALG00000012894,ENSGALG00000003521,ENSGALG00000006343,ENSGALG00000003005,ENSGALG00000015028,ENSGALG00000008177,ENSGALG00000043555,ENSGALG00000004593
GO:0008083	growth factor activity	molecular_function	0.012245	0.50873	7	361	102	15035	ENSGALG00000010915,ENSGALG00000028770,ENSGALG00000054770,ENSGALG00000047554,ENSGALG00000036346,ENSGALG00000026098,ENSGALG00000033974
GO:0006812	cation transport	biological_process	0.012347	0.51187	28	361	754	15035	ENSGALG00000009003,ENSGALG00000001693,ENSGALG00000015055,ENSGALG00000006413,ENSGALG00000003560,ENSGALG00000009289,ENSGALG00000038405,XLOC_023902,ENSGALG00000011040,ENSGALG00000015439,ENSGALG00000006992,ENSGALG00000000364,ENSGALG00000048923,ENSGALG00000007047,ENSGALG00000041640,ENSGALG00000028871,ENSGALG00000042626,ENSGALG00000032506,ENSGALG00000002015,ENSGALG00000005502,ENSGALG00000008177,ENSGALG…
GO:0008284	positive regulation of cell proliferation	biological_process	0.012831	0.5308	20	361	486	15035	ENSGALG00000043064,ENSGALG00000000909,ENSGALG00000045052,ENSGALG00000040276,ENSGALG00000006453,ENSGALG00000014716,ENSGALG00000042308,ENSGALG00000012456,ENSGALG00000029819,ENSGALG00000002987,ENSGALG00000015495,ENSGALG00000011347,ENSGALG00000009626,ENSGALG00000036497,ENSGALG00000006992,ENSGALG00000007305,ENSGALG00000033974,ENSGALG00000041640,ENSGALG00000000607,ENSGALG00000010036
GO:0007160	cell-matrix adhesion	biological_process	0.012917	0.53242	8	361	134	15035	ENSGALG00000042079,ENSGALG00000014786,ENSGALG00000009626,ENSGALG00000043555,ENSGALG00000026137,ENSGALG00000051882,ENSGALG00000040857,ENSGALG00000003589
GO:0001558	regulation of cell growth	biological_process	0.012923	0.53242	11	361	214	15035	ENSGALG00000038364,ENSGALG00000033520,ENSGALG00000040672,ENSGALG00000004526,ENSGALG00000011347,ENSGALG00000042626,ENSGALG00000007047,ENSGALG00000026137,ENSGALG00000004285,ENSGALG00000012613,ENSGALG00000008614
GO:0032094	response to food	biological_process	0.012991	0.53407	3	361	21	15035	ENSGALG00000013616,ENSGALG00000011104,ENSGALG00000038241
GO:0072676	lymphocyte migration	biological_process	0.013104	0.53763	5	361	58	15035	ENSGALG00000054196,ENSGALG00000026098,ENSGALG00000003003,ENSGALG00000053549,ENSGALG00000049551
GO:0043367	CD4-positive, alpha-beta T cell differentiation	biological_process	0.013154	0.53842	4	361	39	15035	ENSGALG00000036142,ENSGALG00000013956,ENSGALG00000010915,ENSGALG00000034975
GO:0048519	negative regulation of biological process	biological_process	0.013178	0.53842	93	361	3165	15035	ENSGALG00000014908,ENSGALG00000004526,ENSGALG00000036497,ENSGALG00000013956,ENSGALG00000016945,ENSGALG00000000364,ENSGALG00000006552,ENSGALG00000003521,ENSGALG00000014786,ENSGALG00000010179,ENSGALG00000036189,ENSGALG00000042360,ENSGALG00000009349,ENSGALG00000030140,ENSGALG00000004593,ENSGALG00000042626,ENSGALG00000032506,ENSGALG00000010386,ENSGALG00000029819,ENSGALG00000053601,ENSGALG00000030607,…
GO:0098917	retrograde trans-synaptic signaling	biological_process	0.013289	0.54185	2	361	8	15035	ENSGALG00000042626,ENSGALG00000008177
GO:0019933	cAMP-mediated signaling	biological_process	0.013495	0.54909	7	361	106	15035	ENSGALG00000011104,ENSGALG00000013616,ENSGALG00000012396,ENSGALG00000010820,ENSGALG00000007047,ENSGALG00000023521,ENSGALG00000008177
GO:0009611	response to wounding	biological_process	0.01362	0.55304	13	361	273	15035	ENSGALG00000041867,ENSGALG00000012802,ENSGALG00000023521,ENSGALG00000016480,ENSGALG00000004285,ENSGALG00000029298,ENSGALG00000002987,ENSGALG00000004593,ENSGALG00000026098,ENSGALG00000009626,ENSGALG00000004526,ENSGALG00000038364,ENSGALG00000028770
GO:0048469	cell maturation	biological_process	0.013725	0.55619	7	361	106	15035	ENSGALG00000010179,ENSGALG00000007047,ENSGALG00000000653,ENSGALG00000040276,ENSGALG00000007959,ENSGALG00000034831,ENSGALG00000011347
GO:0098981	cholinergic synapse	cellular_component	0.013827	0.55917	2	361	8	15035	ENSGALG00000003005,ENSGALG00000012894
GO:0001886	endothelial cell morphogenesis	biological_process	0.013893	0.56068	2	361	8	15035	ENSGALG00000000364,ENSGALG00000006821
GO:0045453	bone resorption	biological_process	0.01398	0.56087	4	361	39	15035	ENSGALG00000038241,ENSGALG00000011347,ENSGALG00000053549,ENSGALG00000033520
GO:0034763	negative regulation of transmembrane transport	biological_process	0.013991	0.56087	5	361	60	15035	ENSGALG00000041640,ENSGALG00000048923,ENSGALG00000006992,ENSGALG00000032506,ENSGALG00000009626
GO:0035239	tube morphogenesis	biological_process	0.014004	0.56087	21	361	529	15035	ENSGALG00000016945,ENSGALG00000043555,ENSGALG00000009626,ENSGALG00000011347,ENSGALG00000002987,ENSGALG00000047554,ENSGALG00000011200,ENSGALG00000038364,ENSGALG00000036497,ENSGALG00000043754,ENSGALG00000029836,ENSGALG00000006821,ENSGALG00000041640,ENSGALG00000026098,ENSGALG00000053549,ENSGALG00000006775,ENSGALG00000036189,ENSGALG00000004184,ENSGALG00000036798,ENSGALG00000029819,ENSGALG00000042308
GO:0004888	transmembrane signaling receptor activity	molecular_function	0.014034	0.56087	28	361	748	15035	ENSGALG00000032348,ENSGALG00000015150,ENSGALG00000003005,ENSGALG00000027407,ENSGALG00000013616,ENSGALG00000053747,ENSGALG00000042308,ENSGALG00000012894,ENSGALG00000023521,ENSGALG00000039461,ENSGALG00000007620,ENSGALG00000028304,ENSGALG00000037166,ENSGALG00000000168,ENSGALG00000012307,ENSGALG00000014716,ENSGALG00000021303,ENSGALG00000016296,ENSGALG00000016785,ENSGALG00000038405,ENSGALG00000052981,…
GO:0003174	mitral valve development	biological_process	0.014081	0.56087	2	361	8	15035	ENSGALG00000036497,ENSGALG00000041640
GO:0006906	vesicle fusion	biological_process	0.014098	0.56087	5	361	61	15035	ENSGALG00000011673,ENSGALG00000004917,ENSGALG00000015332,ENSGALG00000009003,ENSGALG00000042626
GO:0015077	monovalent inorganic cation transmembrane transporter activity	molecular_function	0.014107	0.56087	14	361	303	15035	ENSGALG00000016804,ENSGALG00000040541,ENSGALG00000032465,ENSGALG00000011040,ENSGALG00000037285,ENSGALG00000017216,ENSGALG00000038543,XLOC_023902,ENSGALG00000041932,ENSGALG00000005502,ENSGALG00000003560,ENSGALG00000009289,ENSGALG00000001693,ENSGALG00000009003
GO:0005575	cellular_component	cellular_component	0.014125	0.56087	318	361	12642	15035	ENSGALG00000047283,ENSGALG00000000168,ENSGALG00000032320,ENSGALG00000010820,ENSGALG00000006300,ENSGALG00000010865,ENSGALG00000011214,ENSGALG00000029298,ENSGALG00000012121,ENSGALG00000024056,ENSGALG00000014944,ENSGALG00000001502,ENSGALG00000008614,ENSGALG00000029836,ENSGALG00000028721,ENSGALG00000004642,ENSGALG00000004285,ENSGALG00000010801,ENSGALG00000003560,ENSGALG00000033520,ENSGALG00000040038,…
GO:0003810	protein-glutamine gamma-glutamyltransferase activity	molecular_function	0.014157	0.56103	2	361	8	15035	ENSGALG00000006775,ENSGALG00000012802
GO:2001015	negative regulation of skeletal muscle cell differentiation	biological_process	0.014232	0.56288	2	361	8	15035	ENSGALG00000033974,ENSGALG00000041640
GO:0003044	regulation of systemic arterial blood pressure mediated by a chemical signal	biological_process	0.014382	0.56658	4	361	39	15035	ENSGALG00000003521,ENSGALG00000002987,ENSGALG00000033256,ENSGALG00000031343
GO:0051588	regulation of neurotransmitter transport	biological_process	0.014383	0.56658	6	361	85	15035	ENSGALG00000000909,ENSGALG00000042626,ENSGALG00000002015,ENSGALG00000015332,ENSGALG00000008177,ENSGALG00000012894
GO:0086103	G-protein coupled receptor signaling pathway involved in heart process	biological_process	0.014424	0.56705	2	361	8	15035	ENSGALG00000010820,ENSGALG00000008177
GO:0002363	alpha-beta T cell lineage commitment	biological_process	0.014553	0.56969	2	361	8	15035	ENSGALG00000010915,ENSGALG00000036142
GO:1903792	negative regulation of anion transport	biological_process	0.014573	0.56969	2	361	8	15035	ENSGALG00000031997,ENSGALG00000009626
GO:1901612	cardiolipin binding	molecular_function	0.014577	0.56969	2	361	8	15035	ENSGALG00000002121,ENSGALG00000010331
GO:0090280	positive regulation of calcium ion import	biological_process	0.01465	0.57139	2	361	8	15035	ENSGALG00000000364,ENSGALG00000011104
GO:0006887	exocytosis	biological_process	0.014728	0.57332	11	361	220	15035	ENSGALG00000015332,ENSGALG00000016480,ENSGALG00000048923,ENSGALG00000014726,ENSGALG00000010820,ENSGALG00000012456,ENSGALG00000011673,ENSGALG00000012894,ENSGALG00000009003,ENSGALG00000042626,ENSGALG00000004917
GO:0033089	positive regulation of T cell differentiation in thymus	biological_process	0.014899	0.5784	2	361	8	15035	ENSGALG00000053549,ENSGALG00000011347
GO:0034612	response to tumor necrosis factor	biological_process	0.014917	0.5784	7	361	108	15035	ENSGALG00000030140,ENSGALG00000043555,ENSGALG00000054196,ENSGALG00000033520,ENSGALG00000003003,ENSGALG00000049551,ENSGALG00000039461
GO:0051798	positive regulation of hair follicle development	biological_process	0.015036	0.58186	2	361	8	15035	ENSGALG00000014908,ENSGALG00000007047
GO:0051953	negative regulation of amine transport	biological_process	0.0152	0.58708	2	361	8	15035	ENSGALG00000010820,ENSGALG00000042626
GO:0071902	positive regulation of protein serine/threonine kinase activity	biological_process	0.015257	0.58717	10	361	190	15035	ENSGALG00000012321,ENSGALG00000016296,ENSGALG00000053549,ENSGALG00000002766,ENSGALG00000006413,ENSGALG00000009626,ENSGALG00000023521,ENSGALG00000033974,ENSGALG00000006453,ENSGALG00000038241
GO:0043406	positive regulation of MAP kinase activity	biological_process	0.015276	0.58717	8	361	136	15035	ENSGALG00000016296,ENSGALG00000053549,ENSGALG00000012321,ENSGALG00000009626,ENSGALG00000002766,ENSGALG00000023521,ENSGALG00000033974,ENSGALG00000038241
GO:0050806	positive regulation of synaptic transmission	biological_process	0.015292	0.58717	6	361	87	15035	ENSGALG00000009003,ENSGALG00000000168,ENSGALG00000000909,ENSGALG00000010331,ENSGALG00000004526,ENSGALG00000026903
GO:0045124	regulation of bone resorption	biological_process	0.015331	0.58752	3	361	22	15035	ENSGALG00000038241,ENSGALG00000033520,ENSGALG00000053549
GO:0046632	alpha-beta T cell differentiation	biological_process	0.015424	0.58998	5	361	62	15035	ENSGALG00000034975,ENSGALG00000010915,ENSGALG00000011347,ENSGALG00000013956,ENSGALG00000036142
GO:0002577	regulation of antigen processing and presentation	biological_process	0.015491	0.59137	2	361	8	15035	ENSGALG00000008306,ENSGALG00000009626
GO:0005771	multivesicular body	cellular_component	0.015521	0.59137	3	361	22	15035	ENSGALG00000028602,ENSGALG00000008660,ENSGALG00000002503
GO:0023014	signal transduction by protein phosphorylation	biological_process	0.015702	0.59713	20	361	498	15035	ENSGALG00000000607,ENSGALG00000049551,ENSGALG00000033974,ENSGALG00000028770,ENSGALG00000040672,ENSGALG00000016296,ENSGALG00000009626,ENSGALG00000043555,ENSGALG00000002987,ENSGALG00000054196,ENSGALG00000049157,ENSGALG00000002766,ENSGALG00000029819,ENSGALG00000003003,ENSGALG00000023521,ENSGALG00000038241,ENSGALG00000011104,ENSGALG00000053549,ENSGALG00000012321,ENSGALG00000043662
GO:0006939	smooth muscle contraction	biological_process	0.015808	0.5997	5	361	62	15035	ENSGALG00000012894,ENSGALG00000003005,ENSGALG00000006343,ENSGALG00000004593,ENSGALG00000043555
GO:0071702	organic substance transport	biological_process	0.01583	0.5997	50	361	1548	15035	ENSGALG00000015332,ENSGALG00000041122,ENSGALG00000009725,ENSGALG00000012092,ENSGALG00000007047,ENSGALG00000041640,ENSGALG00000014971,ENSGALG00000006413,ENSGALG00000033256,ENSGALG00000038364,ENSGALG00000028770,ENSGALG00000004833,ENSGALG00000016785,ENSGALG00000011104,ENSGALG00000017216,ENSGALG00000014726,ENSGALG00000014768,ENSGALG00000016804,ENSGALG00000023521,ENSGALG00000028871,ENSGALG00000002015,…
GO:0097435	supramolecular fiber organization	biological_process	0.015876	0.60028	19	361	468	15035	ENSGALG00000039690,ENSGALG00000031112,ENSGALG00000002987,ENSGALG00000013090,ENSGALG00000041555,ENSGALG00000004833,ENSGALG00000032974,ENSGALG00000002786,ENSGALG00000003521,ENSGALG00000005968,ENSGALG00000000299,ENSGALG00000028721,ENSGALG00000036142,ENSGALG00000000909,ENSGALG00000011214,ENSGALG00000014786,ENSGALG00000040136,ENSGALG00000011086,ENSGALG00000012456
GO:0048659	smooth muscle cell proliferation	biological_process	0.016122	0.60842	5	361	62	15035	ENSGALG00000003521,ENSGALG00000006992,ENSGALG00000002987,ENSGALG00000009626,ENSGALG00000038364
GO:0051952	regulation of amine transport	biological_process	0.016256	0.61232	4	361	41	15035	ENSGALG00000038241,ENSGALG00000002015,ENSGALG00000042626,ENSGALG00000010820
GO:0004866	endopeptidase inhibitor activity	molecular_function	0.016527	0.62134	7	361	109	15035	ENSGALG00000012872,XLOC_033031,ENSGALG00000006453,ENSGALG00000002987,ENSGALG00000011214,ENSGALG00000008660,ENSGALG00000019552
GO:0072359	circulatory system development	biological_process	0.016816	0.62923	25	361	674	15035	ENSGALG00000011347,ENSGALG00000005707,ENSGALG00000009626,ENSGALG00000033256,ENSGALG00000041555,ENSGALG00000016945,ENSGALG00000002987,ENSGALG00000038364,ENSGALG00000006343,ENSGALG00000011200,ENSGALG00000031343,ENSGALG00000036497,ENSGALG00000043754,ENSGALG00000029836,ENSGALG00000003521,ENSGALG00000006821,ENSGALG00000041640,ENSGALG00000043064,ENSGALG00000026098,ENSGALG00000036189,ENSGALG00000053549,…
GO:0052548	regulation of endopeptidase activity	biological_process	0.016863	0.62923	11	361	219	15035	ENSGALG00000012872,ENSGALG00000009179,ENSGALG00000009626,ENSGALG00000011214,ENSGALG00000019552,ENSGALG00000002987,ENSGALG00000003589,ENSGALG00000006453,ENSGALG00000033974,ENSGALG00000006992,ENSGALG00000008660
GO:0099516	ion antiporter activity	molecular_function	0.016935	0.62923	4	361	42	15035	ENSGALG00000007959,ENSGALG00000033638,ENSGALG00000000745,ENSGALG00000027423
GO:0001678	cellular glucose homeostasis	biological_process	0.016959	0.62923	5	361	64	15035	ENSGALG00000014786,ENSGALG00000036497,ENSGALG00000023521,ENSGALG00000038241,ENSGALG00000011104
GO:0048407	platelet-derived growth factor binding	molecular_function	0.016972	0.62923	2	361	9	15035	ENSGALG00000041555,ENSGALG00000036798
GO:0008233	peptidase activity	molecular_function	0.017342	0.62923	21	361	529	15035	ENSGALG00000013409,ENSGALG00000050186,ENSGALG00000005086,ENSGALG00000005968,ENSGALG00000033974,ENSGALG00000008306,ENSGALG00000006992,ENSGALG00000031343,ENSGALG00000032974,ENSGALG00000011347,ENSGALG00000033256,ENSGALG00000032031,ENSGALG00000001115,ENSGALG00000001407,ENSGALG00000006453,ENSGALG00000040432,ENSGALG00000010331,ENSGALG00000053549,ENSGALG00000004252,ENSGALG00000005903,ENSGALG00000017234
GO:0048149	behavioral response to ethanol	biological_process	0.017372	0.62923	2	361	9	15035	ENSGALG00000040045,ENSGALG00000013616
GO:0045684	positive regulation of epidermis development	biological_process	0.017391	0.62923	3	361	23	15035	ENSGALG00000031997,ENSGALG00000007047,ENSGALG00000014908
GO:0007611	learning or memory	biological_process	0.017482	0.62923	8	361	141	15035	ENSGALG00000005707,ENSGALG00000009003,ENSGALG00000042626,ENSGALG00000010331,ENSGALG00000040045,ENSGALG00000004526,ENSGALG00000040905,ENSGALG00000000653
GO:0007189	adenylate cyclase-activating G-protein coupled receptor signaling pathway	biological_process	0.017517	0.62923	6	361	87	15035	ENSGALG00000010820,ENSGALG00000023521,ENSGALG00000008177,ENSGALG00000011104,ENSGALG00000013616,ENSGALG00000012396
GO:0045861	negative regulation of proteolysis	biological_process	0.017649	0.62923	10	361	192	15035	ENSGALG00000008660,ENSGALG00000006992,ENSGALG00000033974,ENSGALG00000006453,ENSGALG00000003589,ENSGALG00000011214,ENSGALG00000019552,ENSGALG00000002987,ENSGALG00000009626,ENSGALG00000012872
GO:0005126	cytokine receptor binding	molecular_function	0.017777	0.62923	9	361	161	15035	ENSGALG00000049551,ENSGALG00000003003,ENSGALG00000014716,ENSGALG00000010915,ENSGALG00000014786,ENSGALG00000028770,ENSGALG00000026098,ENSGALG00000054196,ENSGALG00000009179
GO:0009617	response to bacterium	biological_process	0.017778	0.62923	13	361	279	15035	ENSGALG00000026098,ENSGALG00000043064,ENSGALG00000008177,ENSGALG00000037522,ENSGALG00000012801,ENSGALG00000012396,ENSGALG00000008945,ENSGALG00000034934,ENSGALG00000027973,ENSGALG00000006453,ENSGALG00000034150,ENSGALG00000010820,ENSGALG00000016128
GO:0004175	endopeptidase activity	molecular_function	0.017841	0.62923	16	361	368	15035	ENSGALG00000032974,ENSGALG00000031343,ENSGALG00000033256,ENSGALG00000050186,ENSGALG00000013409,ENSGALG00000006992,ENSGALG00000005968,ENSGALG00000033974,ENSGALG00000005086,ENSGALG00000004252,ENSGALG00000053549,ENSGALG00000010331,ENSGALG00000005903,ENSGALG00000001115,ENSGALG00000001407,ENSGALG00000032031
GO:0006936	muscle contraction	biological_process	0.017965	0.62923	9	361	168	15035	ENSGALG00000003521,ENSGALG00000028721,ENSGALG00000012894,ENSGALG00000000364,ENSGALG00000004593,ENSGALG00000043555,ENSGALG00000008177,ENSGALG00000006343,ENSGALG00000003005
GO:0001953	negative regulation of cell-matrix adhesion	biological_process	0.01797	0.62923	3	361	24	15035	ENSGALG00000026137,ENSGALG00000014786,ENSGALG00000009626
GO:2001258	negative regulation of cation channel activity	biological_process	0.017975	0.62923	3	361	23	15035	ENSGALG00000032506,ENSGALG00000006992,ENSGALG00000048923
GO:0032270	positive regulation of cellular protein metabolic process	biological_process	0.018162	0.62923	33	361	949	15035	ENSGALG00000003003,ENSGALG00000014716,ENSGALG00000038241,ENSGALG00000006453,ENSGALG00000008177,ENSGALG00000000607,ENSGALG00000049551,ENSGALG00000000653,ENSGALG00000029836,ENSGALG00000036497,ENSGALG00000040672,ENSGALG00000049157,ENSGALG00000047554,ENSGALG00000013956,ENSGALG00000009626,ENSGALG00000023521,ENSGALG00000003547,ENSGALG00000034831,ENSGALG00000011104,ENSGALG00000003589,ENSGALG00000012321,…
GO:0070613	regulation of protein processing	biological_process	0.018166	0.62923	4	361	43	15035	ENSGALG00000000653,ENSGALG00000008660,ENSGALG00000002987,ENSGALG00000009626
GO:0003382	epithelial cell morphogenesis	biological_process	0.018278	0.62923	3	361	24	15035	ENSGALG00000011347,ENSGALG00000000364,ENSGALG00000006821
GO:0007212	dopamine receptor signaling pathway	biological_process	0.018324	0.62923	3	361	24	15035	ENSGALG00000003163,ENSGALG00000013616,ENSGALG00000028602
GO:0071363	cellular response to growth factor stimulus	biological_process	0.018418	0.62923	17	361	409	15035	ENSGALG00000030607,ENSGALG00000040276,ENSGALG00000019312,ENSGALG00000004184,ENSGALG00000008177,ENSGALG00000017050,ENSGALG00000004593,ENSGALG00000036001,ENSGALG00000007358,ENSGALG00000014686,ENSGALG00000031997,ENSGALG00000006821,ENSGALG00000033974,ENSGALG00000047554,ENSGALG00000039690,ENSGALG00000009626,ENSGALG00000043555
GO:0043030	regulation of macrophage activation	biological_process	0.018516	0.62923	3	361	24	15035	ENSGALG00000016785,ENSGALG00000008660,ENSGALG00000009626
GO:0090136	epithelial cell-cell adhesion	biological_process	0.018542	0.62923	2	361	9	15035	ENSGALG00000038364,ENSGALG00000011347
GO:0030206	chondroitin sulfate biosynthetic process	biological_process	0.018563	0.62923	2	361	9	15035	ENSGALG00000030607,ENSGALG00000024056
GO:0071705	nitrogen compound transport	biological_process	0.018593	0.62923	42	361	1270	15035	ENSGALG00000036497,ENSGALG00000041555,ENSGALG00000015055,ENSGALG00000001693,ENSGALG00000005707,ENSGALG00000009003,ENSGALG00000030545,ENSGALG00000009289,ENSGALG00000003560,ENSGALG00000011673,ENSGALG00000004285,ENSGALG00000031372,ENSGALG00000015439,ENSGALG00000008177,ENSGALG00000004917,ENSGALG00000010179,ENSGALG00000014786,ENSGALG00000042626,ENSGALG00000010820,ENSGALG00000040541,ENSGALG00000038241,…
GO:0042635	positive regulation of hair cycle	biological_process	0.01877	0.62923	2	361	9	15035	ENSGALG00000007047,ENSGALG00000014908
GO:0019226	transmission of nerve impulse	biological_process	0.01881	0.62923	4	361	44	15035	ENSGALG00000003005,ENSGALG00000004526,ENSGALG00000038241,ENSGALG00000011040
GO:0051050	positive regulation of transport	biological_process	0.019056	0.62923	19	361	477	15035	ENSGALG00000016480,ENSGALG00000038241,ENSGALG00000011104,ENSGALG00000003589,ENSGALG00000014786,ENSGALG00000004917,ENSGALG00000042626,ENSGALG00000000364,ENSGALG00000007047,ENSGALG00000041640,ENSGALG00000031997,ENSGALG00000002503,ENSGALG00000028770,ENSGALG00000040038,ENSGALG00000016785,ENSGALG00000036497,ENSGALG00000006413,ENSGALG00000003560,ENSGALG00000030545
GO:0032410	negative regulation of transporter activity	biological_process	0.019216	0.62923	4	361	43	15035	ENSGALG00000032506,ENSGALG00000006992,ENSGALG00000048923,ENSGALG00000041640
GO:0090199	regulation of release of cytochrome c from mitochondria	biological_process	0.019269	0.62923	3	361	24	15035	ENSGALG00000033974,ENSGALG00000009179,ENSGALG00000006992
GO:0004953	icosanoid receptor activity	molecular_function	0.01937	0.62923	2	361	9	15035	ENSGALG00000012396,ENSGALG00000032348
GO:0002521	leukocyte differentiation	biological_process	0.019383	0.62923	14	361	315	15035	ENSGALG00000015495,ENSGALG00000013956,ENSGALG00000011347,ENSGALG00000036142,ENSGALG00000003670,ENSGALG00000034975,ENSGALG00000033520,ENSGALG00000036497,ENSGALG00000037522,ENSGALG00000053549,ENSGALG00000014786,ENSGALG00000010915,ENSGALG00000008306,ENSGALG00000040276
GO:0090174	organelle membrane fusion	biological_process	0.019458	0.62923	5	361	66	15035	ENSGALG00000042626,ENSGALG00000009003,ENSGALG00000015332,ENSGALG00000004917,ENSGALG00000011673
GO:0008324	cation transmembrane transporter activity	molecular_function	0.019736	0.62923	20	361	511	15035	ENSGALG00000015439,ENSGALG00000011040,XLOC_023902,ENSGALG00000003014,ENSGALG00000003560,ENSGALG00000009289,ENSGALG00000001693,ENSGALG00000014971,ENSGALG00000009003,ENSGALG00000015055,ENSGALG00000017216,ENSGALG00000037285,ENSGALG00000038543,ENSGALG00000016804,ENSGALG00000040541,ENSGALG00000032465,ENSGALG00000028871,ENSGALG00000041932,ENSGALG00000005502,ENSGALG00000003005
GO:0061135	endopeptidase regulator activity	molecular_function	0.019829	0.62923	7	361	113	15035	ENSGALG00000006453,XLOC_033031,ENSGALG00000012872,ENSGALG00000011214,ENSGALG00000002987,ENSGALG00000008660,ENSGALG00000019552
GO:0015893	drug transport	biological_process	0.01989	0.62923	8	361	140	15035	ENSGALG00000028871,ENSGALG00000003560,ENSGALG00000009289,ENSGALG00000042626,ENSGALG00000002015,ENSGALG00000041122,ENSGALG00000007047,ENSGALG00000040541
GO:0045581	negative regulation of T cell differentiation	biological_process	0.019908	0.62923	3	361	24	15035	ENSGALG00000011347,ENSGALG00000008306,ENSGALG00000036142
GO:0021700	developmental maturation	biological_process	0.020151	0.62923	9	361	170	15035	ENSGALG00000034831,ENSGALG00000032320,ENSGALG00000040276,ENSGALG00000007959,ENSGALG00000007047,ENSGALG00000000653,ENSGALG00000011347,ENSGALG00000032415,ENSGALG00000010179
GO:0050789	regulation of biological process	biological_process	0.020151	0.62923	193	361	7269	15035	ENSGALG00000028602,ENSGALG00000000653,ENSGALG00000000607,ENSGALG00000019114,ENSGALG00000015833,ENSGALG00000052981,ENSGALG00000029354,ENSGALG00000043754,ENSGALG00000011347,ENSGALG00000041555,ENSGALG00000009488,ENSGALG00000006453,ENSGALG00000038543,ENSGALG00000038241,ENSGALG00000012481,ENSGALG00000017050,ENSGALG00000040045,ENSGALG00000008177,ENSGALG00000004917,ENSGALG00000043064,ENSGALG00000026098,…
GO:0040036	regulation of fibroblast growth factor receptor signaling pathway	biological_process	0.020648	0.62923	3	361	25	15035	ENSGALG00000009626,ENSGALG00000004593,ENSGALG00000040276
GO:0042165	neurotransmitter binding	molecular_function	0.020779	0.62923	4	361	44	15035	ENSGALG00000016804,ENSGALG00000003014,ENSGALG00000003005,ENSGALG00000017216
GO:1904063	negative regulation of cation transmembrane transport	biological_process	0.020918	0.62923	4	361	44	15035	ENSGALG00000048923,ENSGALG00000041640,ENSGALG00000006992,ENSGALG00000032506
GO:0031638	zymogen activation	biological_process	0.021013	0.62923	3	361	25	15035	ENSGALG00000005086,ENSGALG00000009626,ENSGALG00000002987
GO:0004930	G-protein coupled receptor activity	molecular_function	0.021361	0.62923	19	361	466	15035	ENSGALG00000008032,ENSGALG00000021303,ENSGALG00000038405,ENSGALG00000052981,ENSGALG00000012396,ENSGALG00000000607,ENSGALG00000016699,ENSGALG00000007047,ENSGALG00000032060,ENSGALG00000027407,ENSGALG00000013616,ENSGALG00000053747,ENSGALG00000032348,ENSGALG00000015150,ENSGALG00000037166,ENSGALG00000000168,ENSGALG00000012307,ENSGALG00000023521,ENSGALG00000012894
GO:0046942	carboxylic acid transport	biological_process	0.021363	0.62923	10	361	200	15035	ENSGALG00000028871,ENSGALG00000009626,ENSGALG00000033638,ENSGALG00000043064,ENSGALG00000042626,ENSGALG00000027423,ENSGALG00000007959,ENSGALG00000041122,ENSGALG00000000745,ENSGALG00000040541
GO:0090101	negative regulation of transmembrane receptor protein serine/threonine kinase signaling pathway	biological_process	0.021402	0.62923	6	361	91	15035	ENSGALG00000019312,ENSGALG00000038364,ENSGALG00000014908,ENSGALG00000007358,ENSGALG00000014686,ENSGALG00000030607
GO:1902533	positive regulation of intracellular signal transduction	biological_process	0.021424	0.62923	22	361	578	15035	ENSGALG00000043662,ENSGALG00000009179,ENSGALG00000008177,ENSGALG00000012321,ENSGALG00000053549,ENSGALG00000011104,ENSGALG00000006453,ENSGALG00000014716,ENSGALG00000038241,ENSGALG00000023521,ENSGALG00000003003,ENSGALG00000002766,ENSGALG00000054196,ENSGALG00000049157,ENSGALG00000002987,ENSGALG00000043555,ENSGALG00000009626,ENSGALG00000016296,ENSGALG00000040672,ENSGALG00000033974,ENSGALG00000049551,…
GO:1903555	regulation of tumor necrosis factor superfamily cytokine production	biological_process	0.021432	0.62923	5	361	67	15035	ENSGALG00000014786,ENSGALG00000053549,ENSGALG00000041640,ENSGALG00000006453,ENSGALG00000009626
GO:0046850	regulation of bone remodeling	biological_process	0.021442	0.62923	3	361	25	15035	ENSGALG00000038241,ENSGALG00000033520,ENSGALG00000053549
GO:0044070	regulation of anion transport	biological_process	0.021665	0.62923	4	361	45	15035	ENSGALG00000000364,ENSGALG00000031997,ENSGALG00000009626,ENSGALG00000042626
GO:0001664	G-protein coupled receptor binding	molecular_function	0.021755	0.62923	9	361	168	15035	ENSGALG00000023521,ENSGALG00000049551,ENSGALG00000007047,ENSGALG00000003003,ENSGALG00000011104,ENSGALG00000003163,ENSGALG00000015028,ENSGALG00000026098,ENSGALG00000054196
GO:0018410	C-terminal protein amino acid modification	biological_process	0.021824	0.62923	2	361	10	15035	ENSGALG00000008614,ENSGALG00000017234
GO:0043009	chordate embryonic development	biological_process	0.021842	0.62923	13	361	289	15035	ENSGALG00000040276,ENSGALG00000001191,ENSGALG00000041640,ENSGALG00000030607,ENSGALG00000042308,ENSGALG00000032031,ENSGALG00000004593,ENSGALG00000047554,ENSGALG00000011347,ENSGALG00000033256,ENSGALG00000041555,ENSGALG00000036497,ENSGALG00000031343
GO:1903305	regulation of regulated secretory pathway	biological_process	0.021852	0.62923	6	361	93	15035	ENSGALG00000012894,ENSGALG00000004917,ENSGALG00000012456,ENSGALG00000048923,ENSGALG00000042626,ENSGALG00000015332
GO:0072538	T-helper 17 type immune response	biological_process	0.021917	0.62923	2	361	10	15035	ENSGALG00000010915,ENSGALG00000036142
GO:0072539	T-helper 17 cell differentiation	biological_process	0.021917	0.62923	2	361	10	15035	ENSGALG00000036142,ENSGALG00000010915
GO:0030672	synaptic vesicle membrane	cellular_component	0.021973	0.62923	4	361	46	15035	ENSGALG00000001693,ENSGALG00000009289,ENSGALG00000041122,ENSGALG00000014967
GO:0099501	exocytic vesicle membrane	cellular_component	0.021973	0.62923	4	361	46	15035	ENSGALG00000014967,ENSGALG00000041122,ENSGALG00000009289,ENSGALG00000001693
GO:0015849	organic acid transport	biological_process	0.021996	0.62923	10	361	201	15035	ENSGALG00000027423,ENSGALG00000009626,ENSGALG00000033638,ENSGALG00000028871,ENSGALG00000042626,ENSGALG00000043064,ENSGALG00000040541,ENSGALG00000000745,ENSGALG00000007959,ENSGALG00000041122
GO:0120025	plasma membrane bounded cell projection	cellular_component	0.022098	0.62923	38	361	1156	15035	ENSGALG00000012894,ENSGALG00000015089,ENSGALG00000041225,ENSGALG00000000168,ENSGALG00000014716,ENSGALG00000006221,ENSGALG00000032958,ENSGALG00000010331,ENSGALG00000042626,ENSGALG00000015898,ENSGALG00000014967,ENSGALG00000000653,ENSGALG00000010299,ENSGALG00000003521,ENSGALG00000007959,ENSGALG00000039356,ENSGALG00000007305,ENSGALG00000011040,XLOC_023902,ENSGALG00000043754,ENSGALG00000003560,ENSGALG…
GO:0090277	positive regulation of peptide hormone secretion	biological_process	0.022237	0.62923	4	361	45	15035	ENSGALG00000003560,ENSGALG00000011104,ENSGALG00000004917,ENSGALG00000036497
GO:0048020	CCR chemokine receptor binding	molecular_function	0.022313	0.62923	3	361	24	15035	ENSGALG00000049551,ENSGALG00000003003,ENSGALG00000054196
GO:0048708	astrocyte differentiation	biological_process	0.022415	0.62923	4	361	45	15035	ENSGALG00000000653,ENSGALG00000000607,ENSGALG00000014716,ENSGALG00000000909
GO:0045576	mast cell activation	biological_process	0.022462	0.62923	3	361	26	15035	ENSGALG00000010820,ENSGALG00000012456,ENSGALG00000054783
GO:0030414	peptidase inhibitor activity	molecular_function	0.02248	0.62923	7	361	116	15035	ENSGALG00000006453,XLOC_033031,ENSGALG00000012872,ENSGALG00000011214,ENSGALG00000008660,ENSGALG00000019552,ENSGALG00000002987
GO:0043369	CD4-positive or CD8-positive, alpha-beta T cell lineage commitment	biological_process	0.022519	0.62923	2	361	10	15035	ENSGALG00000036142,ENSGALG00000010915
GO:0042325	regulation of phosphorylation	biological_process	0.022524	0.62923	33	361	964	15035	ENSGALG00000043662,ENSGALG00000036001,ENSGALG00000027786,ENSGALG00000012321,ENSGALG00000053549,ENSGALG00000003589,ENSGALG00000011104,ENSGALG00000023521,ENSGALG00000012456,ENSGALG00000002766,ENSGALG00000054196,ENSGALG00000002987,ENSGALG00000006413,ENSGALG00000043555,ENSGALG00000016296,ENSGALG00000028770,ENSGALG00000006992,ENSGALG00000033974,ENSGALG00000041640,ENSGALG00000012613,ENSGALG00000026137,…
GO:0072560	type B pancreatic cell maturation	biological_process	0.022529	0.62923	1	361	1	15035	ENSGALG00000010179
GO:2000078	positive regulation of type B pancreatic cell development	biological_process	0.022529	0.62923	1	361	1	15035	ENSGALG00000010179
GO:0005587	collagen type IV trimer	cellular_component	0.02259	0.62923	1	361	1	15035	ENSGALG00000036798
GO:0030020	extracellular matrix structural constituent conferring tensile strength	molecular_function	0.02259	0.62923	1	361	1	15035	ENSGALG00000036798
GO:0098642	network-forming collagen trimer	cellular_component	0.02259	0.62923	1	361	1	15035	ENSGALG00000036798
GO:0098645	collagen network	cellular_component	0.02259	0.62923	1	361	1	15035	ENSGALG00000036798
GO:0098651	basement membrane collagen trimer	cellular_component	0.02259	0.62923	1	361	1	15035	ENSGALG00000036798
GO:0071706	tumor necrosis factor superfamily cytokine production	biological_process	0.02265	0.62923	5	361	68	15035	ENSGALG00000041640,ENSGALG00000014786,ENSGALG00000053549,ENSGALG00000006453,ENSGALG00000009626
GO:0001937	negative regulation of endothelial cell proliferation	biological_process	0.022683	0.62923	3	361	26	15035	ENSGALG00000006821,ENSGALG00000004184,ENSGALG00000009626
GO:1990674	Golgi cis cisterna membrane	cellular_component	0.0227	0.62923	1	361	1	15035	ENSGALG00000028602
GO:0015143	urate transmembrane transporter activity	molecular_function	0.022707	0.62923	1	361	1	15035	ENSGALG00000014971
GO:0015747	urate transport	biological_process	0.022707	0.62923	1	361	1	15035	ENSGALG00000014971
GO:1901702	salt transmembrane transporter activity	molecular_function	0.022707	0.62923	1	361	1	15035	ENSGALG00000014971
GO:0070032	synaptobrevin 2-SNAP-25-syntaxin-1a-complexin I complex	cellular_component	0.022715	0.62923	1	361	1	15035	ENSGALG00000009003
GO:0005329	dopamine transmembrane transporter activity	molecular_function	0.022719	0.62923	1	361	1	15035	ENSGALG00000003560
GO:0005330	dopamine:sodium symporter activity	molecular_function	0.022719	0.62923	1	361	1	15035	ENSGALG00000003560
GO:0005333	norepinephrine transmembrane transporter activity	molecular_function	0.022719	0.62923	1	361	1	15035	ENSGALG00000003560
GO:0005334	norepinephrine:sodium symporter activity	molecular_function	0.022719	0.62923	1	361	1	15035	ENSGALG00000003560
GO:0004058	aromatic-L-amino-acid decarboxylase activity	molecular_function	0.022729	0.62923	1	361	1	15035	ENSGALG00000013094
GO:0036468	L-dopa decarboxylase activity	molecular_function	0.022729	0.62923	1	361	1	15035	ENSGALG00000013094
GO:0048688	negative regulation of sprouting of injured axon	biological_process	0.022731	0.62923	1	361	1	15035	ENSGALG00000004526
GO:0048692	negative regulation of axon extension involved in regeneration	biological_process	0.022731	0.62923	1	361	1	15035	ENSGALG00000004526
GO:0005592	collagen type XI trimer	cellular_component	0.022732	0.62923	1	361	1	15035	ENSGALG00000005180
GO:0050928	negative regulation of positive chemotaxis	biological_process	0.022733	0.62923	1	361	1	15035	ENSGALG00000036189
GO:0034678	integrin alpha8-beta1 complex	cellular_component	0.022735	0.62923	1	361	1	15035	ENSGALG00000043555
GO:0097195	pilomotor reflex	biological_process	0.022735	0.62923	1	361	1	15035	ENSGALG00000043555
GO:0071105	response to interleukin-11	biological_process	0.022737	0.62923	1	361	1	15035	ENSGALG00000037522
GO:0071348	cellular response to interleukin-11	biological_process	0.022737	0.62923	1	361	1	15035	ENSGALG00000037522
GO:0046449	creatinine metabolic process	biological_process	0.022759	0.62923	1	361	1	15035	ENSGALG00000010331
GO:0061837	neuropeptide processing	biological_process	0.022759	0.62923	1	361	1	15035	ENSGALG00000010331
GO:0072338	cellular lactam metabolic process	biological_process	0.022759	0.62923	1	361	1	15035	ENSGALG00000010331
GO:0070106	interleukin-27-mediated signaling pathway	biological_process	0.022768	0.62923	1	361	1	15035	ENSGALG00000014716
GO:1901611	phosphatidylglycerol binding	molecular_function	0.022779	0.62923	2	361	10	15035	ENSGALG00000002121,ENSGALG00000010331
GO:0004102	choline O-acetyltransferase activity	molecular_function	0.022791	0.62923	1	361	1	15035	ENSGALG00000002289
GO:0005275	amine transmembrane transporter activity	molecular_function	0.022792	0.62923	1	361	1	15035	ENSGALG00000015055
GO:0071879	positive regulation of adenylate cyclase-activating adrenergic receptor signaling pathway	biological_process	0.022823	0.62923	1	361	1	15035	ENSGALG00000008177
GO:0140196	positive regulation of adenylate cyclase-activating adrenergic receptor signaling pathway involved in heart process	biological_process	0.022823	0.62923	1	361	1	15035	ENSGALG00000008177
GO:1904492	Ac-Asp-Glu binding	molecular_function	0.022871	0.62923	1	361	1	15035	ENSGALG00000017234
GO:1904493	tetrahydrofolyl-poly(glutamate) polymer binding	molecular_function	0.022871	0.62923	1	361	1	15035	ENSGALG00000017234
GO:0071206	establishment of protein localization to juxtaparanode region of axon	biological_process	0.022905	0.62923	1	361	1	15035	ENSGALG00000000653
GO:0002113	interleukin-33 binding	molecular_function	0.022913	0.62923	1	361	1	15035	ENSGALG00000016785
GO:0004979	beta-endorphin receptor activity	molecular_function	0.022942	0.62923	1	361	1	15035	ENSGALG00000013616
GO:0061358	negative regulation of Wnt protein secretion	biological_process	0.022942	0.62923	1	361	1	15035	ENSGALG00000013616
GO:0006196	AMP catabolic process	biological_process	0.022943	0.62923	1	361	1	15035	ENSGALG00000015833
GO:0046086	adenosine biosynthetic process	biological_process	0.022943	0.62923	1	361	1	15035	ENSGALG00000015833
GO:0004621	glycosylphosphatidylinositol phospholipase D activity	molecular_function	0.022943	0.62923	1	361	1	15035	ENSGALG00000029836
GO:0006507	GPI anchor release	biological_process	0.022943	0.62923	1	361	1	15035	ENSGALG00000029836
GO:0034014	response to triglyceride	biological_process	0.022943	0.62923	1	361	1	15035	ENSGALG00000029836
GO:0071401	cellular response to triglyceride	biological_process	0.022943	0.62923	1	361	1	15035	ENSGALG00000029836
GO:0048627	myoblast development	biological_process	0.023	0.62923	1	361	1	15035	ENSGALG00000016480
GO:0003065	positive regulation of heart rate by epinephrine	biological_process	0.023027	0.62923	1	361	1	15035	ENSGALG00000003521
GO:0045780	positive regulation of bone resorption	biological_process	0.023133	0.62923	2	361	10	15035	ENSGALG00000033520,ENSGALG00000053549
GO:0046852	positive regulation of bone remodeling	biological_process	0.023133	0.62923	2	361	10	15035	ENSGALG00000033520,ENSGALG00000053549
GO:1900453	negative regulation of long term synaptic depression	biological_process	0.023138	0.62923	1	361	1	15035	ENSGALG00000000168
GO:0070848	response to growth factor	biological_process	0.023141	0.62923	17	361	420	15035	ENSGALG00000030607,ENSGALG00000004184,ENSGALG00000019312,ENSGALG00000040276,ENSGALG00000017050,ENSGALG00000008177,ENSGALG00000036001,ENSGALG00000004593,ENSGALG00000006821,ENSGALG00000031997,ENSGALG00000014686,ENSGALG00000007358,ENSGALG00000033974,ENSGALG00000009626,ENSGALG00000043555,ENSGALG00000039690,ENSGALG00000047554
GO:0033821	DNA beta-glucosyltransferase activity	molecular_function	0.023159	0.62923	1	361	1	15035	XLOC_104865
GO:0002580	regulation of antigen processing and presentation of peptide or polysaccharide antigen via MHC class II	biological_process	0.023254	0.62923	1	361	1	15035	ENSGALG00000009626
GO:0002581	negative regulation of antigen processing and presentation of peptide or polysaccharide antigen via MHC class II	biological_process	0.023254	0.62923	1	361	1	15035	ENSGALG00000009626
GO:0004835	tubulin-tyrosine ligase activity	molecular_function	0.023282	0.62923	1	361	1	15035	ENSGALG00000008614
GO:0018166	C-terminal protein-tyrosinylation	biological_process	0.023282	0.62923	1	361	1	15035	ENSGALG00000008614
GO:0018322	protein tyrosinylation	biological_process	0.023282	0.62923	1	361	1	15035	ENSGALG00000008614
GO:0099080	supramolecular complex	cellular_component	0.023291	0.62923	23	361	611	15035	ENSGALG00000006343,ENSGALG00000031112,XLOC_059712,ENSGALG00000043555,ENSGALG00000041555,ENSGALG00000014686,ENSGALG00000028721,ENSGALG00000009641,ENSGALG00000000653,ENSGALG00000002786,ENSGALG00000003521,ENSGALG00000005180,ENSGALG00000040136,ENSGALG00000008177,ENSGALG00000006221,ENSGALG00000000909,ENSGALG00000051754,ENSGALG00000015898,ENSGALG00000054783,ENSGALG00000011086,ENSGALG00000012456,ENSGALG…
GO:0099081	supramolecular polymer	cellular_component	0.023291	0.62923	23	361	611	15035	ENSGALG00000006221,ENSGALG00000005180,ENSGALG00000008177,ENSGALG00000040136,ENSGALG00000051754,ENSGALG00000015898,ENSGALG00000000909,ENSGALG00000012456,ENSGALG00000011086,ENSGALG00000054783,ENSGALG00000039447,ENSGALG00000036798,ENSGALG00000006343,ENSGALG00000043555,ENSGALG00000041555,ENSGALG00000031112,XLOC_059712,ENSGALG00000000653,ENSGALG00000014686,ENSGALG00000028721,ENSGALG00000009641,ENSGALG…
GO:0030330	DNA damage response, signal transduction by p53 class mediator	biological_process	0.023425	0.62923	4	361	46	15035	ENSGALG00000054783,ENSGALG00000041640,ENSGALG00000036497,ENSGALG00000015898
GO:0042110	T cell activation	biological_process	0.023486	0.62923	12	361	261	15035	ENSGALG00000008306,ENSGALG00000014716,ENSGALG00000040276,ENSGALG00000012456,ENSGALG00000011347,ENSGALG00000013956,ENSGALG00000003670,ENSGALG00000036142,ENSGALG00000034975,ENSGALG00000036497,ENSGALG00000053549,ENSGALG00000010915
GO:0043120	tumor necrosis factor binding	molecular_function	0.023621	0.62923	1	361	1	15035	ENSGALG00000039461
GO:0008344	adult locomotory behavior	biological_process	0.023635	0.62923	5	361	69	15035	ENSGALG00000000653,ENSGALG00000040905,ENSGALG00000042241,ENSGALG00000002015,ENSGALG00000032415
GO:1903537	meiotic cell cycle process involved in oocyte maturation	biological_process	0.023652	0.62923	1	361	1	15035	ENSGALG00000034831
GO:1903538	regulation of meiotic cell cycle process involved in oocyte maturation	biological_process	0.023652	0.62923	1	361	1	15035	ENSGALG00000034831
GO:0035295	tube development	biological_process	0.023665	0.62923	24	361	660	15035	ENSGALG00000004184,ENSGALG00000036798,ENSGALG00000029819,ENSGALG00000042308,ENSGALG00000026098,ENSGALG00000036142,ENSGALG00000053549,ENSGALG00000006775,ENSGALG00000036189,ENSGALG00000029836,ENSGALG00000006821,ENSGALG00000041640,ENSGALG00000016945,ENSGALG00000033256,ENSGALG00000009626,ENSGALG00000043555,ENSGALG00000011347,ENSGALG00000002987,ENSGALG00000047554,ENSGALG00000011200,ENSGALG00000032974,…
GO:0002683	negative regulation of immune system process	biological_process	0.023769	0.62923	11	361	232	15035	ENSGALG00000036142,ENSGALG00000003670,ENSGALG00000009626,ENSGALG00000011347,ENSGALG00000014786,ENSGALG00000016785,ENSGALG00000038364,ENSGALG00000008660,ENSGALG00000000168,ENSGALG00000008306,ENSGALG00000053601
GO:0042710	biofilm formation	biological_process	0.023864	0.62923	1	361	1	15035	ENSGALG00000006453
GO:0044010	single-species biofilm formation	biological_process	0.023864	0.62923	1	361	1	15035	ENSGALG00000006453
GO:0044407	single-species biofilm formation in or on host organism	biological_process	0.023864	0.62923	1	361	1	15035	ENSGALG00000006453
GO:1900190	regulation of single-species biofilm formation	biological_process	0.023864	0.62923	1	361	1	15035	ENSGALG00000006453
GO:1900191	negative regulation of single-species biofilm formation	biological_process	0.023864	0.62923	1	361	1	15035	ENSGALG00000006453
GO:1900228	regulation of single-species biofilm formation in or on host organism	biological_process	0.023864	0.62923	1	361	1	15035	ENSGALG00000006453
GO:1900229	negative regulation of single-species biofilm formation in or on host organism	biological_process	0.023864	0.62923	1	361	1	15035	ENSGALG00000006453
GO:0042445	hormone metabolic process	biological_process	0.023875	0.62923	7	361	119	15035	ENSGALG00000031343,ENSGALG00000009725,ENSGALG00000014944,ENSGALG00000002893,ENSGALG00000016804,ENSGALG00000033256,ENSGALG00000017216
GO:0008188	neuropeptide receptor activity	molecular_function	0.024015	0.62923	4	361	45	15035	ENSGALG00000021303,ENSGALG00000007047,ENSGALG00000012307,ENSGALG00000013616
GO:0050886	endocrine process	biological_process	0.024058	0.62923	5	361	68	15035	ENSGALG00000033256,ENSGALG00000002987,ENSGALG00000031343,ENSGALG00000007047,ENSGALG00000028770
GO:0033627	cell adhesion mediated by integrin	biological_process	0.024063	0.62923	4	361	47	15035	ENSGALG00000003589,ENSGALG00000043555,ENSGALG00000038364,ENSGALG00000053601
GO:0019220	regulation of phosphate metabolic process	biological_process	0.024112	0.62923	36	361	1078	15035	ENSGALG00000009349,ENSGALG00000008177,ENSGALG00000014786,ENSGALG00000006453,ENSGALG00000014716,ENSGALG00000038241,ENSGALG00000003003,ENSGALG00000047554,ENSGALG00000049157,ENSGALG00000011347,ENSGALG00000009626,ENSGALG00000040672,ENSGALG00000049551,ENSGALG00000000607,ENSGALG00000043662,ENSGALG00000036001,ENSGALG00000027786,ENSGALG00000053549,ENSGALG00000012321,ENSGALG00000011104,ENSGALG00000003589,…
GO:0061110	dense core granule biogenesis	biological_process	0.024229	0.62923	1	361	1	15035	ENSGALG00000010820
GO:0086030	adenylate cyclase-activating adrenergic receptor signaling pathway involved in cardiac muscle relaxation	biological_process	0.024229	0.62923	1	361	1	15035	ENSGALG00000010820
GO:2000705	regulation of dense core granule biogenesis	biological_process	0.024229	0.62923	1	361	1	15035	ENSGALG00000010820
GO:2000707	positive regulation of dense core granule biogenesis	biological_process	0.024229	0.62923	1	361	1	15035	ENSGALG00000010820
GO:0005984	disaccharide metabolic process	biological_process	0.024276	0.62923	1	361	1	15035	ENSGALG00000012613
GO:0005985	sucrose metabolic process	biological_process	0.024276	0.62923	1	361	1	15035	ENSGALG00000012613
GO:0005986	sucrose biosynthetic process	biological_process	0.024276	0.62923	1	361	1	15035	ENSGALG00000012613
GO:0046351	disaccharide biosynthetic process	biological_process	0.024276	0.62923	1	361	1	15035	ENSGALG00000012613
GO:0051174	regulation of phosphorus metabolic process	biological_process	0.024396	0.62923	36	361	1079	15035	ENSGALG00000012456,ENSGALG00000023521,ENSGALG00000003589,ENSGALG00000011104,ENSGALG00000053549,ENSGALG00000012321,ENSGALG00000036001,ENSGALG00000027786,ENSGALG00000043662,ENSGALG00000026137,ENSGALG00000041640,ENSGALG00000012613,ENSGALG00000033974,ENSGALG00000006992,ENSGALG00000028770,ENSGALG00000016296,ENSGALG00000015495,ENSGALG00000006413,ENSGALG00000043555,ENSGALG00000002766,ENSGALG00000054196,…
GO:2000119	negative regulation of sodium-dependent phosphate transport	biological_process	0.024441	0.62923	1	361	1	15035	ENSGALG00000031997
GO:0010814	substance P catabolic process	biological_process	0.0245	0.62923	1	361	1	15035	ENSGALG00000031343
GO:0010816	calcitonin catabolic process	biological_process	0.0245	0.62923	1	361	1	15035	ENSGALG00000031343
GO:0034959	endothelin maturation	biological_process	0.0245	0.62923	1	361	1	15035	ENSGALG00000031343
GO:0007193	adenylate cyclase-inhibiting G-protein coupled receptor signaling pathway	biological_process	0.024501	0.62923	4	361	46	15035	ENSGALG00000012894,ENSGALG00000023521,ENSGALG00000000607,ENSGALG00000013616
GO:0098609	cell-cell adhesion	biological_process	0.02453	0.62923	18	361	461	15035	ENSGALG00000036142,ENSGALG00000016905,ENSGALG00000030372,ENSGALG00000053549,ENSGALG00000014716,ENSGALG00000036925,ENSGALG00000012456,ENSGALG00000041225,ENSGALG00000043555,ENSGALG00000011347,ENSGALG00000013956,ENSGALG00000038364,ENSGALG00000015833,ENSGALG00000004526,ENSGALG00000008306,ENSGALG00000016908,ENSGALG00000052653,ENSGALG00000000299
GO:0098688	parallel fiber to Purkinje cell synapse	cellular_component	0.024602	0.62923	2	361	11	15035	ENSGALG00000036925,ENSGALG00000026903
GO:0004500	dopamine beta-monooxygenase activity	molecular_function	0.024641	0.62923	1	361	1	15035	ENSGALG00000040045
GO:0042309	homoiothermy	biological_process	0.024641	0.62923	1	361	1	15035	ENSGALG00000040045
GO:0021686	cerebellar granular layer maturation	biological_process	0.024669	0.62923	1	361	1	15035	ENSGALG00000032320
GO:0021933	radial glia guided migration of cerebellar granule cell	biological_process	0.024669	0.62923	1	361	1	15035	ENSGALG00000032320
GO:0071065	alpha9-beta1 integrin-vascular cell adhesion molecule-1 complex	cellular_component	0.024711	0.62923	1	361	1	15035	ENSGALG00000053549
GO:0072535	tumor necrosis factor (ligand) superfamily member 11 production	biological_process	0.024711	0.62923	1	361	1	15035	ENSGALG00000053549
GO:0072680	extracellular matrix-dependent thymocyte migration	biological_process	0.024711	0.62923	1	361	1	15035	ENSGALG00000053549
GO:0072681	fibronectin-dependent thymocyte migration	biological_process	0.024711	0.62923	1	361	1	15035	ENSGALG00000053549
GO:2000307	regulation of tumor necrosis factor (ligand) superfamily member 11 production	biological_process	0.024711	0.62923	1	361	1	15035	ENSGALG00000053549
GO:2000309	positive regulation of tumor necrosis factor (ligand) superfamily member 11 production	biological_process	0.024711	0.62923	1	361	1	15035	ENSGALG00000053549
GO:2000410	regulation of thymocyte migration	biological_process	0.024711	0.62923	1	361	1	15035	ENSGALG00000053549
GO:2000412	positive regulation of thymocyte migration	biological_process	0.024711	0.62923	1	361	1	15035	ENSGALG00000053549
GO:2000413	regulation of fibronectin-dependent thymocyte migration	biological_process	0.024711	0.62923	1	361	1	15035	ENSGALG00000053549
GO:2000415	positive regulation of fibronectin-dependent thymocyte migration	biological_process	0.024711	0.62923	1	361	1	15035	ENSGALG00000053549
GO:1905590	fibronectin fibril organization	biological_process	0.024713	0.62923	1	361	1	15035	ENSGALG00000036142
GO:1902105	regulation of leukocyte differentiation	biological_process	0.024722	0.62923	8	361	147	15035	ENSGALG00000008306,ENSGALG00000033520,ENSGALG00000053549,ENSGALG00000014786,ENSGALG00000013956,ENSGALG00000011347,ENSGALG00000036142,ENSGALG00000003670
GO:0048174	negative regulation of short-term neuronal synaptic plasticity	biological_process	0.024742	0.62923	1	361	1	15035	ENSGALG00000042626
GO:0098675	intrinsic component of neuronal dense core vesicle membrane	cellular_component	0.024742	0.62923	1	361	1	15035	ENSGALG00000042626
GO:0098956	intrinsic component of dense core granule membrane	cellular_component	0.024742	0.62923	1	361	1	15035	ENSGALG00000042626
GO:0099012	neuronal dense core vesicle membrane	cellular_component	0.024742	0.62923	1	361	1	15035	ENSGALG00000042626
GO:0099066	integral component of neuronal dense core vesicle membrane	cellular_component	0.024742	0.62923	1	361	1	15035	ENSGALG00000042626
GO:0099082	retrograde trans-synaptic signaling by neuropeptide	biological_process	0.024742	0.62923	1	361	1	15035	ENSGALG00000042626
GO:0099161	regulation of presynaptic dense core granule exocytosis	biological_process	0.024742	0.62923	1	361	1	15035	ENSGALG00000042626
GO:1905415	positive regulation of dense core granule exocytosis	biological_process	0.024742	0.62923	1	361	1	15035	ENSGALG00000042626
GO:1905432	regulation of retrograde trans-synaptic signaling by neuropeptide	biological_process	0.024742	0.62923	1	361	1	15035	ENSGALG00000042626
GO:1905433	negative regulation of retrograde trans-synaptic signaling by neuropeptide	biological_process	0.024742	0.62923	1	361	1	15035	ENSGALG00000042626
GO:1990742	microvesicle	cellular_component	0.024742	0.62923	1	361	1	15035	ENSGALG00000042626
GO:0010015	root morphogenesis	biological_process	0.024803	0.62923	1	361	1	15035	ENSGALG00000007047
GO:0010053	root epidermal cell differentiation	biological_process	0.024803	0.62923	1	361	1	15035	ENSGALG00000007047
GO:0010054	trichoblast differentiation	biological_process	0.024803	0.62923	1	361	1	15035	ENSGALG00000007047
GO:0022622	root system development	biological_process	0.024803	0.62923	1	361	1	15035	ENSGALG00000007047
GO:0031763	galanin receptor binding	molecular_function	0.024803	0.62923	1	361	1	15035	ENSGALG00000007047
GO:0031764	type 1 galanin receptor binding	molecular_function	0.024803	0.62923	1	361	1	15035	ENSGALG00000007047
GO:0031765	type 2 galanin receptor binding	molecular_function	0.024803	0.62923	1	361	1	15035	ENSGALG00000007047
GO:0031766	type 3 galanin receptor binding	molecular_function	0.024803	0.62923	1	361	1	15035	ENSGALG00000007047
GO:0048364	root development	biological_process	0.024803	0.62923	1	361	1	15035	ENSGALG00000007047
GO:0048764	trichoblast maturation	biological_process	0.024803	0.62923	1	361	1	15035	ENSGALG00000007047
GO:0048765	root hair cell differentiation	biological_process	0.024803	0.62923	1	361	1	15035	ENSGALG00000007047
GO:0048767	root hair elongation	biological_process	0.024803	0.62923	1	361	1	15035	ENSGALG00000007047
GO:0080147	root hair cell development	biological_process	0.024803	0.62923	1	361	1	15035	ENSGALG00000007047
GO:0090558	plant epidermis development	biological_process	0.024803	0.62923	1	361	1	15035	ENSGALG00000007047
GO:0090627	plant epidermal cell differentiation	biological_process	0.024803	0.62923	1	361	1	15035	ENSGALG00000007047
GO:0099402	plant organ development	biological_process	0.024803	0.62923	1	361	1	15035	ENSGALG00000007047
GO:1902890	regulation of root hair elongation	biological_process	0.024803	0.62923	1	361	1	15035	ENSGALG00000007047
GO:1902891	negative regulation of root hair elongation	biological_process	0.024803	0.62923	1	361	1	15035	ENSGALG00000007047
GO:1903888	regulation of plant epidermal cell differentiation	biological_process	0.024803	0.62923	1	361	1	15035	ENSGALG00000007047
GO:1903889	negative regulation of plant epidermal cell differentiation	biological_process	0.024803	0.62923	1	361	1	15035	ENSGALG00000007047
GO:1905392	plant organ morphogenesis	biological_process	0.024803	0.62923	1	361	1	15035	ENSGALG00000007047
GO:1905421	regulation of plant organ morphogenesis	biological_process	0.024803	0.62923	1	361	1	15035	ENSGALG00000007047
GO:1905422	negative regulation of plant organ morphogenesis	biological_process	0.024803	0.62923	1	361	1	15035	ENSGALG00000007047
GO:2000067	regulation of root morphogenesis	biological_process	0.024803	0.62923	1	361	1	15035	ENSGALG00000007047
GO:2000280	regulation of root development	biological_process	0.024803	0.62923	1	361	1	15035	ENSGALG00000007047
GO:0017158	regulation of calcium ion-dependent exocytosis	biological_process	0.024808	0.62923	5	361	71	15035	ENSGALG00000042626,ENSGALG00000015332,ENSGALG00000012894,ENSGALG00000004917,ENSGALG00000048923
GO:0030704	vitelline membrane formation	biological_process	0.024853	0.62923	1	361	1	15035	ENSGALG00000011347
GO:0042706	eye photoreceptor cell fate commitment	biological_process	0.024853	0.62923	1	361	1	15035	ENSGALG00000011347
GO:0046552	photoreceptor cell fate commitment	biological_process	0.024853	0.62923	1	361	1	15035	ENSGALG00000011347
GO:0048074	negative regulation of eye pigmentation	biological_process	0.024853	0.62923	1	361	1	15035	ENSGALG00000011347
GO:0048086	negative regulation of developmental pigmentation	biological_process	0.024853	0.62923	1	361	1	15035	ENSGALG00000011347
GO:0060220	camera-type eye photoreceptor cell fate commitment	biological_process	0.024853	0.62923	1	361	1	15035	ENSGALG00000011347
GO:0060173	limb development	biological_process	0.024921	0.62923	8	361	148	15035	ENSGALG00000040276,ENSGALG00000041640,ENSGALG00000014686,ENSGALG00000030607,ENSGALG00000011347,ENSGALG00000033256,ENSGALG00000031343,ENSGALG00000036497
GO:0035710	CD4-positive, alpha-beta T cell activation	biological_process	0.025005	0.62923	4	361	47	15035	ENSGALG00000034975,ENSGALG00000010915,ENSGALG00000013956,ENSGALG00000036142
GO:0003421	growth plate cartilage axis specification	biological_process	0.02511	0.62923	1	361	1	15035	ENSGALG00000000364
GO:0044722	renal phosphate excretion	biological_process	0.02511	0.62923	1	361	1	15035	ENSGALG00000000364
GO:1903402	regulation of renal phosphate excretion	biological_process	0.02511	0.62923	1	361	1	15035	ENSGALG00000000364
GO:1903403	negative regulation of renal phosphate excretion	biological_process	0.02511	0.62923	1	361	1	15035	ENSGALG00000000364
GO:0031226	intrinsic component of plasma membrane	cellular_component	0.025208	0.62923	31	361	910	15035	ENSGALG00000000745,ENSGALG00000000653,ENSGALG00000012092,ENSGALG00000016908,ENSGALG00000003014,ENSGALG00000016699,ENSGALG00000011040,ENSGALG00000007959,ENSGALG00000038405,ENSGALG00000003560,ENSGALG00000008032,ENSGALG00000043555,ENSGALG00000023521,ENSGALG00000012894,ENSGALG00000032031,ENSGALG00000041225,ENSGALG00000012307,ENSGALG00000037285,ENSGALG00000036925,ENSGALG00000038543,ENSGALG00000014716,…
GO:0038102	activin receptor antagonist activity	molecular_function	0.025213	0.62923	1	361	1	15035	ENSGALG00000014908
GO:0009790	embryo development	biological_process	0.025287	0.62923	22	361	590	15035	ENSGALG00000004593,ENSGALG00000036142,ENSGALG00000003670,ENSGALG00000032031,ENSGALG00000015908,ENSGALG00000042308,ENSGALG00000030607,ENSGALG00000001191,ENSGALG00000003589,ENSGALG00000040276,ENSGALG00000015253,ENSGALG00000031343,ENSGALG00000036497,ENSGALG00000011347,ENSGALG00000041555,ENSGALG00000033256,ENSGALG00000047554,ENSGALG00000031112,ENSGALG00000004285,ENSGALG00000014686,ENSGALG00000041640,…
GO:0048048	embryonic eye morphogenesis	biological_process	0.025325	0.62923	3	361	27	15035	ENSGALG00000041640,ENSGALG00000014686,ENSGALG00000011347
GO:0002472	macrophage antigen processing and presentation	biological_process	0.025351	0.62923	1	361	1	15035	ENSGALG00000008306
GO:0002616	regulation of macrophage antigen processing and presentation	biological_process	0.025351	0.62923	1	361	1	15035	ENSGALG00000008306
GO:0002617	negative regulation of macrophage antigen processing and presentation	biological_process	0.025351	0.62923	1	361	1	15035	ENSGALG00000008306
GO:0043381	negative regulation of memory T cell differentiation	biological_process	0.025351	0.62923	1	361	1	15035	ENSGALG00000008306
GO:0015075	ion transmembrane transporter activity	molecular_function	0.025483	0.62923	25	361	696	15035	ENSGALG00000027423,ENSGALG00000003005,ENSGALG00000041932,ENSGALG00000005502,ENSGALG00000033638,ENSGALG00000028871,ENSGALG00000016804,ENSGALG00000032465,ENSGALG00000040541,ENSGALG00000038543,ENSGALG00000037285,ENSGALG00000017216,ENSGALG00000001693,ENSGALG00000014971,ENSGALG00000009003,ENSGALG00000015055,ENSGALG00000009289,ENSGALG00000003560,ENSGALG00000003014,ENSGALG00000000745,XLOC_023902,ENSGALG…
GO:0010625	positive regulation of Schwann cell proliferation	biological_process	0.025613	0.62923	1	361	1	15035	ENSGALG00000000909
GO:0008507	sodium:iodide symporter activity	molecular_function	0.02562	0.62923	1	361	1	15035	ENSGALG00000041932
GO:0032605	hepatocyte growth factor production	biological_process	0.025637	0.62923	1	361	1	15035	ENSGALG00000028770
GO:0032646	regulation of hepatocyte growth factor production	biological_process	0.025637	0.62923	1	361	1	15035	ENSGALG00000028770
GO:0032686	negative regulation of hepatocyte growth factor production	biological_process	0.025637	0.62923	1	361	1	15035	ENSGALG00000028770
GO:0048175	hepatocyte growth factor biosynthetic process	biological_process	0.025637	0.62923	1	361	1	15035	ENSGALG00000028770
GO:0048176	regulation of hepatocyte growth factor biosynthetic process	biological_process	0.025637	0.62923	1	361	1	15035	ENSGALG00000028770
GO:0048178	negative regulation of hepatocyte growth factor biosynthetic process	biological_process	0.025637	0.62923	1	361	1	15035	ENSGALG00000028770
GO:0008523	sodium-dependent multivitamin transmembrane transporter activity	molecular_function	0.025683	0.62923	1	361	1	15035	ENSGALG00000040541
GO:0015887	pantothenate transmembrane transport	biological_process	0.025683	0.62923	1	361	1	15035	ENSGALG00000040541
GO:0052547	regulation of peptidase activity	biological_process	0.025683	0.62923	11	361	234	15035	ENSGALG00000006992,ENSGALG00000008660,ENSGALG00000003589,ENSGALG00000033974,ENSGALG00000006453,ENSGALG00000011214,ENSGALG00000002987,ENSGALG00000019552,ENSGALG00000012872,ENSGALG00000009179,ENSGALG00000009626
GO:0010185	regulation of cellular defense response	biological_process	0.025742	0.62923	1	361	1	15035	ENSGALG00000026098
GO:0010186	positive regulation of cellular defense response	biological_process	0.025742	0.62923	1	361	1	15035	ENSGALG00000026098
GO:0002361	CD4-positive, CD25-positive, alpha-beta regulatory T cell differentiation	biological_process	0.025746	0.62923	1	361	1	15035	ENSGALG00000034975
GO:0002522	leukocyte migration involved in immune response	biological_process	0.025746	0.62923	1	361	1	15035	ENSGALG00000034975
GO:0070540	stearic acid binding	molecular_function	0.025752	0.62923	1	361	1	15035	ENSGALG00000043064
GO:0071399	cellular response to linoleic acid	biological_process	0.025752	0.62923	1	361	1	15035	ENSGALG00000043064
GO:0021509	roof plate formation	biological_process	0.025756	0.62923	1	361	1	15035	ENSGALG00000047554
GO:2001049	regulation of tendon cell differentiation	biological_process	0.025756	0.62923	1	361	1	15035	ENSGALG00000047554
GO:2001051	positive regulation of tendon cell differentiation	biological_process	0.025756	0.62923	1	361	1	15035	ENSGALG00000047554
GO:0003094	glomerular filtration	biological_process	0.025763	0.62923	2	361	11	15035	ENSGALG00000000168,ENSGALG00000004593
GO:0044558	uterine smooth muscle relaxation	biological_process	0.025772	0.62923	1	361	1	15035	ENSGALG00000015028
GO:1900719	regulation of uterine smooth muscle relaxation	biological_process	0.025772	0.62923	1	361	1	15035	ENSGALG00000015028
GO:1900721	positive regulation of uterine smooth muscle relaxation	biological_process	0.025772	0.62923	1	361	1	15035	ENSGALG00000015028
GO:1901079	positive regulation of relaxation of muscle	biological_process	0.025772	0.62923	1	361	1	15035	ENSGALG00000015028
GO:1901080	regulation of relaxation of smooth muscle	biological_process	0.025772	0.62923	1	361	1	15035	ENSGALG00000015028
GO:1901082	positive regulation of relaxation of smooth muscle	biological_process	0.025772	0.62923	1	361	1	15035	ENSGALG00000015028
GO:0021560	abducens nerve development	biological_process	0.025773	0.62923	1	361	1	15035	ENSGALG00000003670
GO:0021572	rhombomere 6 development	biological_process	0.025773	0.62923	1	361	1	15035	ENSGALG00000003670
GO:0021598	abducens nerve morphogenesis	biological_process	0.025773	0.62923	1	361	1	15035	ENSGALG00000003670
GO:0021599	abducens nerve formation	biological_process	0.025773	0.62923	1	361	1	15035	ENSGALG00000003670
GO:0110070	cellularization cleavage furrow	cellular_component	0.025777	0.62923	1	361	1	15035	ENSGALG00000006776
GO:0048736	appendage development	biological_process	0.02578	0.62923	8	361	149	15035	ENSGALG00000033256,ENSGALG00000011347,ENSGALG00000031343,ENSGALG00000036497,ENSGALG00000040276,ENSGALG00000030607,ENSGALG00000041640,ENSGALG00000014686
GO:0036372	opsin transport	biological_process	0.025789	0.62923	1	361	1	15035	ENSGALG00000005707
GO:0140049	regulation of endocardial cushion to mesenchymal transition	biological_process	0.025791	0.62923	1	361	1	15035	ENSGALG00000041640
GO:0140051	positive regulation of endocardial cushion to mesenchymal transition	biological_process	0.025791	0.62923	1	361	1	15035	ENSGALG00000041640
GO:2000800	regulation of endocardial cushion to mesenchymal transition involved in heart valve formation	biological_process	0.025791	0.62923	1	361	1	15035	ENSGALG00000041640
GO:2000802	positive regulation of endocardial cushion to mesenchymal transition involved in heart valve formation	biological_process	0.025791	0.62923	1	361	1	15035	ENSGALG00000041640
GO:0097630	intrinsic component of omegasome membrane	cellular_component	0.025792	0.62923	1	361	1	15035	ENSGALG00000026492
GO:0097631	integral component of omegasome membrane	cellular_component	0.025792	0.62923	1	361	1	15035	ENSGALG00000026492
GO:2000759	regulation of N-terminal peptidyl-lysine acetylation	biological_process	0.0258	0.62923	1	361	1	15035	ENSGALG00000036497
GO:2000761	positive regulation of N-terminal peptidyl-lysine acetylation	biological_process	0.0258	0.62923	1	361	1	15035	ENSGALG00000036497
GO:0031696	alpha-2C adrenergic receptor binding	molecular_function	0.025806	0.62923	1	361	1	15035	ENSGALG00000023521
GO:0071882	phospholipase C-activating adrenergic receptor signaling pathway	biological_process	0.025806	0.62923	1	361	1	15035	ENSGALG00000023521
GO:0007263	nitric oxide mediated signal transduction	biological_process	0.025997	0.63311	2	361	11	15035	ENSGALG00000008177,ENSGALG00000009626
GO:2001236	regulation of extrinsic apoptotic signaling pathway	biological_process	0.026187	0.63696	6	361	96	15035	ENSGALG00000009626,ENSGALG00000033974,ENSGALG00000009179,ENSGALG00000016296,ENSGALG00000029819,ENSGALG00000040045
GO:0070374	positive regulation of ERK1 and ERK2 cascade	biological_process	0.02626	0.63795	7	361	121	15035	ENSGALG00000003003,ENSGALG00000049551,ENSGALG00000043555,ENSGALG00000011104,ENSGALG00000043662,ENSGALG00000054196,ENSGALG00000002987
GO:1904888	cranial skeletal system development	biological_process	0.026467	0.6422	4	361	48	15035	ENSGALG00000040276,ENSGALG00000030607,ENSGALG00000041640,ENSGALG00000032031
GO:0150034	distal axon	cellular_component	0.02667	0.64633	6	361	96	15035	ENSGALG00000001693,ENSGALG00000015332,ENSGALG00000039690,ENSGALG00000009289,ENSGALG00000016908,ENSGALG00000048923
GO:0051707	response to other organism	biological_process	0.026723	0.64682	17	361	421	15035	ENSGALG00000012894,ENSGALG00000010820,ENSGALG00000016128,ENSGALG00000003547,ENSGALG00000006453,ENSGALG00000027973,ENSGALG00000034934,ENSGALG00000012801,ENSGALG00000037522,ENSGALG00000008177,ENSGALG00000043064,ENSGALG00000026098,ENSGALG00000034150,ENSGALG00000008945,ENSGALG00000012396,ENSGALG00000008306,ENSGALG00000006343
GO:0001973	adenosine receptor signaling pathway	biological_process	0.026789	0.64762	2	361	11	15035	ENSGALG00000000653,ENSGALG00000000168
GO:0008306	associative learning	biological_process	0.026859	0.6482	4	361	48	15035	ENSGALG00000005707,ENSGALG00000009003,ENSGALG00000004526,ENSGALG00000040045
GO:0071495	cellular response to endogenous stimulus	biological_process	0.026878	0.6482	28	361	803	15035	ENSGALG00000028770,ENSGALG00000047554,ENSGALG00000039690,ENSGALG00000031112,ENSGALG00000041555,ENSGALG00000009626,ENSGALG00000043555,ENSGALG00000031997,ENSGALG00000014686,ENSGALG00000007358,ENSGALG00000004285,ENSGALG00000012396,ENSGALG00000007959,ENSGALG00000029836,ENSGALG00000015150,ENSGALG00000014786,ENSGALG00000041932,ENSGALG00000017050,ENSGALG00000004593,ENSGALG00000036001,ENSGALG00000027786,…
GO:0014909	smooth muscle cell migration	biological_process	0.027085	0.65166	3	361	28	15035	ENSGALG00000038364,ENSGALG00000003589,ENSGALG00000003521
GO:0060416	response to growth hormone	biological_process	0.027088	0.65166	2	361	11	15035	ENSGALG00000002289,ENSGALG00000014786
GO:0018208	peptidyl-proline modification	biological_process	0.027148	0.65232	4	361	47	15035	ENSGALG00000004833,ENSGALG00000011181,ENSGALG00000037669,ENSGALG00000025764
GO:0050877	nervous system process	biological_process	0.027383	0.65715	23	361	629	15035	ENSGALG00000010331,ENSGALG00000003005,ENSGALG00000001716,ENSGALG00000040045,ENSGALG00000042626,ENSGALG00000013616,ENSGALG00000053747,ENSGALG00000008660,ENSGALG00000000168,ENSGALG00000038241,ENSGALG00000004526,ENSGALG00000052981,ENSGALG00000005707,ENSGALG00000009003,ENSGALG00000006413,ENSGALG00000041555,ENSGALG00000000653,ENSGALG00000003014,ENSGALG00000011040,ENSGALG00000042241,ENSGALG00000030822,…
GO:0002286	T cell activation involved in immune response	biological_process	0.027618	0.6614	4	361	48	15035	ENSGALG00000008306,ENSGALG00000013956,ENSGALG00000036142,ENSGALG00000010915
GO:0042995	cell projection	cellular_component	0.027639	0.6614	38	361	1175	15035	ENSGALG00000015089,ENSGALG00000012894,ENSGALG00000041225,ENSGALG00000000168,ENSGALG00000014716,ENSGALG00000010331,ENSGALG00000032958,ENSGALG00000006221,ENSGALG00000042626,ENSGALG00000015898,ENSGALG00000014967,ENSGALG00000000653,ENSGALG00000010299,ENSGALG00000007959,ENSGALG00000011040,ENSGALG00000039356,ENSGALG00000007305,ENSGALG00000003521,XLOC_023902,ENSGALG00000043754,ENSGALG00000009289,ENSGALG…
GO:0040008	regulation of growth	biological_process	0.02766	0.6614	15	361	365	15035	ENSGALG00000008614,ENSGALG00000007047,ENSGALG00000026137,ENSGALG00000004285,ENSGALG00000012613,ENSGALG00000002893,ENSGALG00000041640,ENSGALG00000015089,ENSGALG00000011347,ENSGALG00000015495,ENSGALG00000042626,ENSGALG00000038364,ENSGALG00000040672,ENSGALG00000033520,ENSGALG00000004526
GO:0098657	import into cell	biological_process	0.027763	0.66306	18	361	466	15035	ENSGALG00000015898,ENSGALG00000000909,ENSGALG00000036142,ENSGALG00000042626,ENSGALG00000006775,ENSGALG00000008177,ENSGALG00000003589,ENSGALG00000037285,ENSGALG00000009626,ENSGALG00000001693,ENSGALG00000009003,ENSGALG00000037929,ENSGALG00000009289,ENSGALG00000003560,ENSGALG00000013090,ENSGALG00000002503,ENSGALG00000000653,ENSGALG00000031997
GO:0043207	response to external biotic stimulus	biological_process	0.027801	0.66316	17	361	423	15035	ENSGALG00000012396,ENSGALG00000008945,ENSGALG00000008306,ENSGALG00000034150,ENSGALG00000006343,ENSGALG00000003547,ENSGALG00000027973,ENSGALG00000034934,ENSGALG00000006453,ENSGALG00000012894,ENSGALG00000016128,ENSGALG00000010820,ENSGALG00000026098,ENSGALG00000043064,ENSGALG00000008177,ENSGALG00000037522,ENSGALG00000012801
GO:0032924	activin receptor signaling pathway	biological_process	0.027839	0.66326	3	361	28	15035	ENSGALG00000028770,ENSGALG00000014908,ENSGALG00000047554
GO:0043292	contractile fiber	cellular_component	0.027977	0.66573	7	361	126	15035	ENSGALG00000028721,ENSGALG00000011086,ENSGALG00000008177,ENSGALG00000006343,ENSGALG00000000653,ENSGALG00000003521,ENSGALG00000043555
GO:0097094	craniofacial suture morphogenesis	biological_process	0.028009	0.66573	2	361	11	15035	ENSGALG00000032031,ENSGALG00000041640
GO:0051571	positive regulation of histone H3-K4 methylation	biological_process	0.028057	0.66607	2	361	12	15035	ENSGALG00000011104,ENSGALG00000013956
GO:0051962	positive regulation of nervous system development	biological_process	0.028217	0.66907	13	361	305	15035	ENSGALG00000010331,ENSGALG00000047554,ENSGALG00000042626,ENSGALG00000039690,ENSGALG00000000909,ENSGALG00000013616,ENSGALG00000016905,ENSGALG00000009488,ENSGALG00000000607,ENSGALG00000042308,ENSGALG00000011242,ENSGALG00000014716,ENSGALG00000008660
GO:0048598	embryonic morphogenesis	biological_process	0.028894	0.68428	17	361	429	15035	ENSGALG00000015253,ENSGALG00000031343,ENSGALG00000036497,ENSGALG00000011347,ENSGALG00000047554,ENSGALG00000031112,ENSGALG00000004285,ENSGALG00000041640,ENSGALG00000014686,ENSGALG00000006992,ENSGALG00000003670,ENSGALG00000032031,ENSGALG00000015908,ENSGALG00000030607,ENSGALG00000042308,ENSGALG00000003589,ENSGALG00000040276
GO:0006953	acute-phase response	biological_process	0.029121	0.68885	2	361	11	15035	ENSGALG00000043064,ENSGALG00000010915
GO:0090200	positive regulation of release of cytochrome c from mitochondria	biological_process	0.029429	0.69529	2	361	11	15035	ENSGALG00000006992,ENSGALG00000009179
GO:0002294	CD4-positive, alpha-beta T cell differentiation involved in immune response	biological_process	0.0295	0.6953	3	361	29	15035	ENSGALG00000010915,ENSGALG00000036142,ENSGALG00000013956
GO:0042093	T-helper cell differentiation	biological_process	0.0295	0.6953	3	361	29	15035	ENSGALG00000036142,ENSGALG00000013956,ENSGALG00000010915
GO:0002685	regulation of leukocyte migration	biological_process	0.029567	0.69605	6	361	98	15035	ENSGALG00000012456,ENSGALG00000003003,ENSGALG00000038364,ENSGALG00000016713,ENSGALG00000053549,ENSGALG00000000168
GO:0021510	spinal cord development	biological_process	0.029851	0.70079	5	361	72	15035	ENSGALG00000036497,ENSGALG00000030822,ENSGALG00000047554,ENSGALG00000042241,ENSGALG00000036142
GO:0015872	dopamine transport	biological_process	0.029895	0.70079	3	361	29	15035	ENSGALG00000002015,ENSGALG00000042626,ENSGALG00000003560
GO:0009792	embryo development ending in birth or egg hatching	biological_process	0.029906	0.70079	13	361	302	15035	ENSGALG00000032031,ENSGALG00000041640,ENSGALG00000030607,ENSGALG00000042308,ENSGALG00000001191,ENSGALG00000040276,ENSGALG00000031343,ENSGALG00000036497,ENSGALG00000011347,ENSGALG00000033256,ENSGALG00000041555,ENSGALG00000047554,ENSGALG00000004593
GO:0006509	membrane protein ectodomain proteolysis	biological_process	0.02991	0.70079	3	361	29	15035	ENSGALG00000053549,ENSGALG00000023521,ENSGALG00000029836
GO:0008201	heparin binding	molecular_function	0.030286	0.70875	5	361	74	15035	ENSGALG00000006453,ENSGALG00000009626,ENSGALG00000001407,ENSGALG00000009601,ENSGALG00000038364
GO:0097205	renal filtration	biological_process	0.030459	0.71197	2	361	12	15035	ENSGALG00000004593,ENSGALG00000000168
GO:0090303	positive regulation of wound healing	biological_process	0.030817	0.71948	3	361	29	15035	ENSGALG00000009626,ENSGALG00000002987,ENSGALG00000023521
GO:1903306	negative regulation of regulated secretory pathway	biological_process	0.031124	0.7258	2	361	12	15035	ENSGALG00000048923,ENSGALG00000042626
GO:0014009	glial cell proliferation	biological_process	0.031234	0.72752	2	361	12	15035	ENSGALG00000000909,ENSGALG00000036497
GO:0022857	transmembrane transporter activity	molecular_function	0.031307	0.72835	29	361	849	15035	ENSGALG00000011040,ENSGALG00000007959,ENSGALG00000015439,ENSGALG00000041122,XLOC_023902,ENSGALG00000014967,ENSGALG00000000745,ENSGALG00000003014,ENSGALG00000009289,ENSGALG00000003560,ENSGALG00000030545,ENSGALG00000009003,ENSGALG00000014971,ENSGALG00000001693,ENSGALG00000015055,ENSGALG00000017167,ENSGALG00000017216,ENSGALG00000037285,ENSGALG00000038543,ENSGALG00000016804,ENSGALG00000032465,ENSGALG…
GO:0002366	leukocyte activation involved in immune response	biological_process	0.031362	0.72877	7	361	126	15035	ENSGALG00000036142,ENSGALG00000008306,ENSGALG00000013956,ENSGALG00000037522,ENSGALG00000010915,ENSGALG00000012456,ENSGALG00000010820
GO:0014816	skeletal muscle satellite cell differentiation	biological_process	0.031502	0.7304	2	361	12	15035	ENSGALG00000033974,ENSGALG00000041640
GO:0001932	regulation of protein phosphorylation	biological_process	0.031506	0.7304	30	361	883	15035	ENSGALG00000006992,ENSGALG00000033974,ENSGALG00000049551,ENSGALG00000041640,ENSGALG00000000607,ENSGALG00000026137,ENSGALG00000002766,ENSGALG00000049157,ENSGALG00000054196,ENSGALG00000047554,ENSGALG00000002987,ENSGALG00000006413,ENSGALG00000043555,ENSGALG00000009626,ENSGALG00000016296,ENSGALG00000040672,ENSGALG00000028770,ENSGALG00000011104,ENSGALG00000003589,ENSGALG00000006453,ENSGALG00000014716,…
GO:0042733	embryonic digit morphogenesis	biological_process	0.031751	0.73521	4	361	50	15035	ENSGALG00000011347,ENSGALG00000030607,ENSGALG00000041640,ENSGALG00000031343
GO:0010594	regulation of endothelial cell migration	biological_process	0.031789	0.73525	6	361	101	15035	ENSGALG00000043754,ENSGALG00000036189,ENSGALG00000000364,ENSGALG00000029836,ENSGALG00000009626,ENSGALG00000004184
GO:0055085	transmembrane transport	biological_process	0.031995	0.73814	36	361	1105	15035	ENSGALG00000048923,ENSGALG00000003014,ENSGALG00000007047,ENSGALG00000041640,ENSGALG00000006992,ENSGALG00000041122,ENSGALG00000014971,ENSGALG00000006413,ENSGALG00000016804,ENSGALG00000017216,ENSGALG00000027423,ENSGALG00000003005,ENSGALG00000041932,ENSGALG00000005502,ENSGALG00000028871,XLOC_040994,ENSGALG00000014967,ENSGALG00000000745,XLOC_023902,ENSGALG00000011040,ENSGALG00000007959,ENSGALG0000001…
GO:0072341	modified amino acid binding	molecular_function	0.032006	0.73814	4	361	51	15035	ENSGALG00000009626,ENSGALG00000002121,ENSGALG00000042626,ENSGALG00000010331
GO:0042730	fibrinolysis	biological_process	0.032027	0.73814	2	361	12	15035	ENSGALG00000002987,ENSGALG00000009626
GO:0097305	response to alcohol	biological_process	0.032357	0.74489	5	361	76	15035	ENSGALG00000029836,ENSGALG00000043064,ENSGALG00000012396,ENSGALG00000013616,ENSGALG00000040045
GO:0002287	alpha-beta T cell activation involved in immune response	biological_process	0.032486	0.74613	3	361	30	15035	ENSGALG00000010915,ENSGALG00000036142,ENSGALG00000013956
GO:0002293	alpha-beta T cell differentiation involved in immune response	biological_process	0.032486	0.74613	3	361	30	15035	ENSGALG00000010915,ENSGALG00000013956,ENSGALG00000036142
GO:0030194	positive regulation of blood coagulation	biological_process	0.032733	0.75005	2	361	12	15035	ENSGALG00000002987,ENSGALG00000009626
GO:1900048	positive regulation of hemostasis	biological_process	0.032733	0.75005	2	361	12	15035	ENSGALG00000002987,ENSGALG00000009626
GO:0018158	protein oxidation	biological_process	0.032827	0.75134	2	361	12	15035	ENSGALG00000013090,ENSGALG00000036142
GO:0043209	myelin sheath	cellular_component	0.032954	0.75337	3	361	30	15035	ENSGALG00000032453,ENSGALG00000030372,ENSGALG00000000653
GO:1901618	organic hydroxy compound transmembrane transporter activity	molecular_function	0.032992	0.75337	3	361	30	15035	ENSGALG00000009289,ENSGALG00000003560,ENSGALG00000001693
GO:0045620	negative regulation of lymphocyte differentiation	biological_process	0.033129	0.75509	3	361	29	15035	ENSGALG00000011347,ENSGALG00000008306,ENSGALG00000036142
GO:0042166	acetylcholine binding	molecular_function	0.033213	0.75509	2	361	12	15035	ENSGALG00000003014,ENSGALG00000003005
GO:0042593	glucose homeostasis	biological_process	0.033243	0.75509	7	361	129	15035	ENSGALG00000011104,ENSGALG00000038241,ENSGALG00000004285,ENSGALG00000040045,ENSGALG00000023521,ENSGALG00000036497,ENSGALG00000014786
GO:0048489	synaptic vesicle transport	biological_process	0.033259	0.75509	6	361	103	15035	ENSGALG00000009003,ENSGALG00000015332,ENSGALG00000042626,ENSGALG00000011673,ENSGALG00000012894,ENSGALG00000004917
GO:0097480	establishment of synaptic vesicle localization	biological_process	0.033259	0.75509	6	361	103	15035	ENSGALG00000011673,ENSGALG00000012894,ENSGALG00000004917,ENSGALG00000015332,ENSGALG00000009003,ENSGALG00000042626
GO:0051224	negative regulation of protein transport	biological_process	0.03337	0.75676	6	361	101	15035	ENSGALG00000023521,ENSGALG00000028770,ENSGALG00000038364,ENSGALG00000010820,ENSGALG00000042626,ENSGALG00000013616
GO:0044342	type B pancreatic cell proliferation	biological_process	0.033418	0.75698	2	361	12	15035	ENSGALG00000040672,ENSGALG00000038364
GO:0032024	positive regulation of insulin secretion	biological_process	0.033572	0.75959	3	361	30	15035	ENSGALG00000036497,ENSGALG00000004917,ENSGALG00000011104
GO:0043542	endothelial cell migration	biological_process	0.033988	0.76799	7	361	130	15035	ENSGALG00000029836,ENSGALG00000004184,ENSGALG00000009626,ENSGALG00000038364,ENSGALG00000000364,ENSGALG00000043754,ENSGALG00000036189
GO:0097164	ammonium ion metabolic process	biological_process	0.03403	0.76799	6	361	102	15035	ENSGALG00000016804,ENSGALG00000016713,ENSGALG00000015977,ENSGALG00000040045,ENSGALG00000017216,ENSGALG00000014938
GO:0009312	oligosaccharide biosynthetic process	biological_process	0.034059	0.76799	2	361	12	15035	ENSGALG00000016128,ENSGALG00000012613
GO:0051589	negative regulation of neurotransmitter transport	biological_process	0.034184	0.76992	2	361	13	15035	ENSGALG00000008177,ENSGALG00000042626
GO:0019838	growth factor binding	molecular_function	0.034292	0.77147	6	361	102	15035	ENSGALG00000036798,ENSGALG00000009626,ENSGALG00000014716,ENSGALG00000041555,ENSGALG00000038364,ENSGALG00000040672
GO:0033500	carbohydrate homeostasis	biological_process	0.034412	0.7733	7	361	130	15035	ENSGALG00000023521,ENSGALG00000036497,ENSGALG00000014786,ENSGALG00000004285,ENSGALG00000040045,ENSGALG00000011104,ENSGALG00000038241
GO:0030201	heparan sulfate proteoglycan metabolic process	biological_process	0.034556	0.77564	3	361	31	15035	ENSGALG00000001371,ENSGALG00000004593,ENSGALG00000031058
GO:0072677	eosinophil migration	biological_process	0.034621	0.77622	2	361	12	15035	ENSGALG00000029819,ENSGALG00000053549
GO:0002263	cell activation involved in immune response	biological_process	0.034929	0.78224	7	361	129	15035	ENSGALG00000037522,ENSGALG00000010915,ENSGALG00000010820,ENSGALG00000012456,ENSGALG00000036142,ENSGALG00000008306,ENSGALG00000013956
GO:0050890	cognition	biological_process	0.035108	0.78535	8	361	161	15035	ENSGALG00000000653,ENSGALG00000040905,ENSGALG00000004526,ENSGALG00000010331,ENSGALG00000040045,ENSGALG00000042626,ENSGALG00000009003,ENSGALG00000005707
GO:0048791	calcium ion-regulated exocytosis of neurotransmitter	biological_process	0.035777	0.79936	2	361	13	15035	ENSGALG00000042626,ENSGALG00000004917
GO:0004497	monooxygenase activity	molecular_function	0.035815	0.79936	5	361	75	15035	ENSGALG00000039742,ENSGALG00000040045,ENSGALG00000008177,ENSGALG00000008283,ENSGALG00000008178
GO:0010596	negative regulation of endothelial cell migration	biological_process	0.035908	0.80011	3	361	31	15035	ENSGALG00000000364,ENSGALG00000036189,ENSGALG00000009626
GO:0034614	cellular response to reactive oxygen species	biological_process	0.035929	0.80011	5	361	77	15035	ENSGALG00000033974,ENSGALG00000003521,ENSGALG00000006992,ENSGALG00000018557,ENSGALG00000000607
GO:0000149	SNARE binding	molecular_function	0.036167	0.8045	5	361	78	15035	ENSGALG00000004917,ENSGALG00000011673,ENSGALG00000042626,ENSGALG00000009003,ENSGALG00000015332
GO:0045580	regulation of T cell differentiation	biological_process	0.036252	0.80548	5	361	77	15035	ENSGALG00000053549,ENSGALG00000008306,ENSGALG00000013956,ENSGALG00000011347,ENSGALG00000036142
GO:0009607	response to biotic stimulus	biological_process	0.036338	0.80648	17	361	438	15035	ENSGALG00000034150,ENSGALG00000012396,ENSGALG00000008945,ENSGALG00000008306,ENSGALG00000006343,ENSGALG00000012894,ENSGALG00000016128,ENSGALG00000010820,ENSGALG00000003547,ENSGALG00000027973,ENSGALG00000034934,ENSGALG00000006453,ENSGALG00000037522,ENSGALG00000008177,ENSGALG00000012801,ENSGALG00000026098,ENSGALG00000043064
GO:0048642	negative regulation of skeletal muscle tissue development	biological_process	0.036412	0.80723	2	361	13	15035	ENSGALG00000033974,ENSGALG00000041640
GO:0140029	exocytic process	biological_process	0.036516	0.80863	4	361	54	15035	ENSGALG00000015332,ENSGALG00000009003,ENSGALG00000011673,ENSGALG00000014726
GO:0032570	response to progesterone	biological_process	0.03658	0.80913	2	361	13	15035	ENSGALG00000012396,ENSGALG00000001559
GO:0007218	neuropeptide signaling pathway	biological_process	0.036997	0.81744	5	361	75	15035	ENSGALG00000013616,ENSGALG00000012307,ENSGALG00000021303,ENSGALG00000007047,ENSGALG00000009725
GO:0034105	positive regulation of tissue remodeling	biological_process	0.037129	0.81945	2	361	13	15035	ENSGALG00000033520,ENSGALG00000053549
GO:0042060	wound healing	biological_process	0.037207	0.82025	10	361	220	15035	ENSGALG00000023521,ENSGALG00000012802,ENSGALG00000016480,ENSGALG00000004285,ENSGALG00000041867,ENSGALG00000038364,ENSGALG00000029298,ENSGALG00000002987,ENSGALG00000026098,ENSGALG00000009626
GO:0001968	fibronectin binding	molecular_function	0.03732	0.82182	2	361	13	15035	ENSGALG00000036142,ENSGALG00000009626
GO:0043032	positive regulation of macrophage activation	biological_process	0.037552	0.82182	2	361	13	15035	ENSGALG00000016785,ENSGALG00000009626
GO:0098801	regulation of renal system process	biological_process	0.037582	0.82182	2	361	13	15035	ENSGALG00000000168,ENSGALG00000000364
GO:0051797	regulation of hair follicle development	biological_process	0.037756	0.82182	2	361	13	15035	ENSGALG00000014908,ENSGALG00000007047
GO:0007596	blood coagulation	biological_process	0.037764	0.82182	6	361	104	15035	ENSGALG00000004285,ENSGALG00000012802,ENSGALG00000041867,ENSGALG00000009626,ENSGALG00000002987,ENSGALG00000029298
GO:0001975	response to amphetamine	biological_process	0.03777	0.82182	2	361	13	15035	ENSGALG00000040045,ENSGALG00000009289
GO:0014075	response to amine	biological_process	0.03777	0.82182	2	361	13	15035	ENSGALG00000009289,ENSGALG00000040045
GO:0050804	modulation of chemical synaptic transmission	biological_process	0.037771	0.82182	11	361	257	15035	ENSGALG00000002015,ENSGALG00000042626,ENSGALG00000000909,ENSGALG00000009003,ENSGALG00000004526,ENSGALG00000010331,ENSGALG00000000168,ENSGALG00000015332,ENSGALG00000026903,ENSGALG00000012894,ENSGALG00000000653
GO:0099177	regulation of trans-synaptic signaling	biological_process	0.037771	0.82182	11	361	257	15035	ENSGALG00000000168,ENSGALG00000015332,ENSGALG00000026903,ENSGALG00000012894,ENSGALG00000000653,ENSGALG00000000909,ENSGALG00000042626,ENSGALG00000002015,ENSGALG00000009003,ENSGALG00000004526,ENSGALG00000010331
GO:0070098	chemokine-mediated signaling pathway	biological_process	0.037802	0.82182	4	361	51	15035	ENSGALG00000054196,ENSGALG00000026098,ENSGALG00000049551,ENSGALG00000003003
GO:0050820	positive regulation of coagulation	biological_process	0.03781	0.82182	2	361	13	15035	ENSGALG00000009626,ENSGALG00000002987
GO:1901032	negative regulation of response to reactive oxygen species	biological_process	0.03786	0.82182	2	361	13	15035	ENSGALG00000000607,ENSGALG00000033974
GO:1903206	negative regulation of hydrogen peroxide-induced cell death	biological_process	0.03786	0.82182	2	361	13	15035	ENSGALG00000000607,ENSGALG00000033974
GO:2001039	negative regulation of cellular response to drug	biological_process	0.03786	0.82182	2	361	13	15035	ENSGALG00000000607,ENSGALG00000033974
GO:0030326	embryonic limb morphogenesis	biological_process	0.037953	0.82208	6	361	104	15035	ENSGALG00000031343,ENSGALG00000030607,ENSGALG00000014686,ENSGALG00000041640,ENSGALG00000011347,ENSGALG00000040276
GO:0007159	leukocyte cell-cell adhesion	biological_process	0.037955	0.82208	8	361	161	15035	ENSGALG00000012456,ENSGALG00000014716,ENSGALG00000008306,ENSGALG00000015833,ENSGALG00000053549,ENSGALG00000011347,ENSGALG00000013956,ENSGALG00000036142
GO:0032496	response to lipopolysaccharide	biological_process	0.038024	0.8226	7	361	131	15035	ENSGALG00000043064,ENSGALG00000026098,ENSGALG00000012396,ENSGALG00000006453,ENSGALG00000012801,ENSGALG00000008177,ENSGALG00000037522
GO:0048471	perinuclear region of cytoplasm	cellular_component	0.038124	0.8226	13	361	317	15035	ENSGALG00000010820,ENSGALG00000014726,ENSGALG00000002893,ENSGALG00000011242,ENSGALG00000054783,ENSGALG00000009003,ENSGALG00000015898,ENSGALG00000042626,ENSGALG00000039690,ENSGALG00000028770,ENSGALG00000031343,ENSGALG00000040038,ENSGALG00000014786
GO:0032096	negative regulation of response to food	biological_process	0.038232	0.8226	2	361	13	15035	ENSGALG00000038241,ENSGALG00000011104
GO:0032099	negative regulation of appetite	biological_process	0.038232	0.8226	2	361	13	15035	ENSGALG00000011104,ENSGALG00000038241
GO:0032105	negative regulation of response to extracellular stimulus	biological_process	0.038232	0.8226	2	361	13	15035	ENSGALG00000011104,ENSGALG00000038241
GO:0032108	negative regulation of response to nutrient levels	biological_process	0.038232	0.8226	2	361	13	15035	ENSGALG00000038241,ENSGALG00000011104
GO:0090025	regulation of monocyte chemotaxis	biological_process	0.03827	0.8226	2	361	13	15035	ENSGALG00000038364,ENSGALG00000016713
GO:0005887	integral component of plasma membrane	cellular_component	0.038663	0.82961	29	361	871	15035	ENSGALG00000038543,ENSGALG00000014716,ENSGALG00000036925,ENSGALG00000037285,ENSGALG00000012307,ENSGALG00000032031,ENSGALG00000041225,ENSGALG00000023521,ENSGALG00000012894,ENSGALG00000028871,ENSGALG00000033638,ENSGALG00000017234,ENSGALG00000016905,ENSGALG00000003005,ENSGALG00000030372,ENSGALG00000027423,ENSGALG00000053549,ENSGALG00000005502,ENSGALG00000011040,ENSGALG00000007959,ENSGALG00000012092,…
GO:0016641	oxidoreductase activity, acting on the CH-NH2 group of donors, oxygen as acceptor	molecular_function	0.038716	0.82961	2	361	13	15035	ENSGALG00000036142,ENSGALG00000013090
GO:0001990	regulation of systemic arterial blood pressure by hormone	biological_process	0.038722	0.82961	3	361	31	15035	ENSGALG00000033256,ENSGALG00000002987,ENSGALG00000031343
GO:1904950	negative regulation of establishment of protein localization	biological_process	0.039102	0.83685	6	361	105	15035	ENSGALG00000013616,ENSGALG00000042626,ENSGALG00000023521,ENSGALG00000010820,ENSGALG00000038364,ENSGALG00000028770
GO:0099512	supramolecular fiber	cellular_component	0.03925	0.83911	22	361	610	15035	ENSGALG00000039447,ENSGALG00000054783,ENSGALG00000011086,ENSGALG00000012456,ENSGALG00000000909,ENSGALG00000051754,ENSGALG00000015898,ENSGALG00000005180,ENSGALG00000008177,ENSGALG00000040136,ENSGALG00000006221,ENSGALG00000002786,ENSGALG00000003521,ENSGALG00000028721,ENSGALG00000014686,ENSGALG00000009641,ENSGALG00000000653,ENSGALG00000031112,XLOC_059712,ENSGALG00000043555,ENSGALG00000041555,ENSGALG…
GO:0046631	alpha-beta T cell activation	biological_process	0.039365	0.84028	5	361	79	15035	ENSGALG00000010915,ENSGALG00000034975,ENSGALG00000036142,ENSGALG00000013956,ENSGALG00000011347
GO:0035113	embryonic appendage morphogenesis	biological_process	0.03942	0.84028	6	361	105	15035	ENSGALG00000031343,ENSGALG00000014686,ENSGALG00000030607,ENSGALG00000041640,ENSGALG00000011347,ENSGALG00000040276
GO:0007379	segment specification	biological_process	0.039433	0.84028	2	361	13	15035	ENSGALG00000001191,ENSGALG00000003670
GO:0010959	regulation of metal ion transport	biological_process	0.039522	0.84128	9	361	194	15035	ENSGALG00000006413,ENSGALG00000032506,ENSGALG00000008177,ENSGALG00000038405,ENSGALG00000011104,ENSGALG00000007047,ENSGALG00000048923,ENSGALG00000000364,ENSGALG00000002893
GO:0045956	positive regulation of calcium ion-dependent exocytosis	biological_process	0.039772	0.84546	2	361	14	15035	ENSGALG00000042626,ENSGALG00000004917
GO:0051580	regulation of neurotransmitter uptake	biological_process	0.039804	0.84546	2	361	14	15035	ENSGALG00000008177,ENSGALG00000000909
GO:0050830	defense response to Gram-positive bacterium	biological_process	0.039867	0.84589	3	361	31	15035	ENSGALG00000010820,ENSGALG00000034150,ENSGALG00000027973
GO:0006940	regulation of smooth muscle contraction	biological_process	0.04025	0.85311	3	361	32	15035	ENSGALG00000043555,ENSGALG00000012894,ENSGALG00000003005
GO:0010001	glial cell differentiation	biological_process	0.040362	0.85456	7	361	134	15035	ENSGALG00000000653,ENSGALG00000054783,ENSGALG00000036497,ENSGALG00000000607,ENSGALG00000003589,ENSGALG00000014716,ENSGALG00000000909
GO:0050926	regulation of positive chemotaxis	biological_process	0.040549	0.8576	2	361	14	15035	ENSGALG00000036189,ENSGALG00000029819
GO:0050878	regulation of body fluid levels	biological_process	0.040914	0.86322	8	361	163	15035	ENSGALG00000009626,ENSGALG00000029298,ENSGALG00000002987,ENSGALG00000041867,ENSGALG00000000168,ENSGALG00000007305,ENSGALG00000004285,ENSGALG00000012802
GO:0050839	cell adhesion molecule binding	molecular_function	0.040982	0.86322	7	361	139	15035	ENSGALG00000009626,ENSGALG00000043555,ENSGALG00000003589,ENSGALG00000038364,ENSGALG00000000299,ENSGALG00000053549,ENSGALG00000054783
GO:0045026	plasma membrane fusion	biological_process	0.041129	0.86322	3	361	32	15035	ENSGALG00000015332,ENSGALG00000009003,ENSGALG00000011673
GO:0033002	muscle cell proliferation	biological_process	0.041217	0.86322	6	361	107	15035	ENSGALG00000003521,ENSGALG00000006992,ENSGALG00000002987,ENSGALG00000009626,ENSGALG00000033974,ENSGALG00000038364
GO:0051247	positive regulation of protein metabolic process	biological_process	0.041292	0.86322	33	361	1015	15035	ENSGALG00000003003,ENSGALG00000006453,ENSGALG00000038241,ENSGALG00000014716,ENSGALG00000008177,ENSGALG00000000607,ENSGALG00000049551,ENSGALG00000000653,ENSGALG00000029836,ENSGALG00000036497,ENSGALG00000040672,ENSGALG00000049157,ENSGALG00000047554,ENSGALG00000013956,ENSGALG00000009626,ENSGALG00000023521,ENSGALG00000003547,ENSGALG00000003589,ENSGALG00000034831,ENSGALG00000011104,ENSGALG00000053549,…
GO:0003323	type B pancreatic cell development	biological_process	0.041463	0.86322	2	361	14	15035	ENSGALG00000010179,ENSGALG00000004285
GO:0045671	negative regulation of osteoclast differentiation	biological_process	0.041827	0.86322	2	361	14	15035	ENSGALG00000003670,ENSGALG00000014786
GO:1900117	regulation of execution phase of apoptosis	biological_process	0.041899	0.86322	2	361	14	15035	ENSGALG00000011104,ENSGALG00000042308
GO:0002275	myeloid cell activation involved in immune response	biological_process	0.042022	0.86322	3	361	33	15035	ENSGALG00000037522,ENSGALG00000012456,ENSGALG00000010820
GO:1904037	positive regulation of epithelial cell apoptotic process	biological_process	0.042082	0.86322	2	361	14	15035	ENSGALG00000009626,ENSGALG00000031997
GO:0061134	peptidase regulator activity	molecular_function	0.042129	0.86322	7	361	133	15035	ENSGALG00000006453,ENSGALG00000012872,XLOC_033031,ENSGALG00000011214,ENSGALG00000008660,ENSGALG00000019552,ENSGALG00000002987
GO:0050817	coagulation	biological_process	0.04221	0.86322	6	361	107	15035	ENSGALG00000004285,ENSGALG00000012802,ENSGALG00000009626,ENSGALG00000041867,ENSGALG00000029298,ENSGALG00000002987
GO:0090287	regulation of cellular response to growth factor stimulus	biological_process	0.042347	0.86322	9	361	194	15035	ENSGALG00000009626,ENSGALG00000043555,ENSGALG00000004593,ENSGALG00000040276,ENSGALG00000019312,ENSGALG00000006821,ENSGALG00000030607,ENSGALG00000031997,ENSGALG00000014686
GO:0007599	hemostasis	biological_process	0.042482	0.86322	6	361	107	15035	ENSGALG00000002987,ENSGALG00000029298,ENSGALG00000009626,ENSGALG00000041867,ENSGALG00000012802,ENSGALG00000004285
GO:0031664	regulation of lipopolysaccharide-mediated signaling pathway	biological_process	0.042523	0.86322	2	361	14	15035	ENSGALG00000006453,ENSGALG00000012801
GO:0051954	positive regulation of amine transport	biological_process	0.042527	0.86322	2	361	14	15035	ENSGALG00000042626,ENSGALG00000038241
GO:0046639	negative regulation of alpha-beta T cell differentiation	biological_process	0.04253	0.86322	2	361	14	15035	ENSGALG00000011347,ENSGALG00000036142
GO:0030203	glycosaminoglycan metabolic process	biological_process	0.042578	0.86322	4	361	55	15035	ENSGALG00000030607,ENSGALG00000009856,ENSGALG00000006413,ENSGALG00000024056
GO:1903036	positive regulation of response to wounding	biological_process	0.042723	0.86322	3	361	33	15035	ENSGALG00000023521,ENSGALG00000009626,ENSGALG00000002987
GO:0097479	synaptic vesicle localization	biological_process	0.042755	0.86322	6	361	110	15035	ENSGALG00000011673,ENSGALG00000012894,ENSGALG00000004917,ENSGALG00000009003,ENSGALG00000015332,ENSGALG00000042626
GO:0038023	signaling receptor activity	molecular_function	0.042764	0.86322	29	361	863	15035	ENSGALG00000008032,ENSGALG00000052981,ENSGALG00000016296,ENSGALG00000038405,ENSGALG00000016785,ENSGALG00000021303,ENSGALG00000012396,ENSGALG00000007047,ENSGALG00000016699,ENSGALG00000004285,ENSGALG00000003014,ENSGALG00000032060,ENSGALG00000000607,ENSGALG00000053747,ENSGALG00000027407,ENSGALG00000013616,ENSGALG00000003005,ENSGALG00000015150,ENSGALG00000032348,ENSGALG00000014716,ENSGALG00000000168,…
GO:1903429	regulation of cell maturation	biological_process	0.043051	0.86322	2	361	14	15035	ENSGALG00000034831,ENSGALG00000007047
GO:1902624	positive regulation of neutrophil migration	biological_process	0.043081	0.86322	2	361	14	15035	ENSGALG00000053549,ENSGALG00000012456
GO:0034103	regulation of tissue remodeling	biological_process	0.043192	0.86322	3	361	33	15035	ENSGALG00000033520,ENSGALG00000053549,ENSGALG00000038241
GO:1901385	regulation of voltage-gated calcium channel activity	biological_process	0.043219	0.86322	2	361	15	15035	ENSGALG00000032506,ENSGALG00000048923
GO:0010714	positive regulation of collagen metabolic process	biological_process	0.043719	0.86322	2	361	14	15035	ENSGALG00000002987,ENSGALG00000011347
GO:0032965	regulation of collagen biosynthetic process	biological_process	0.043719	0.86322	2	361	14	15035	ENSGALG00000002987,ENSGALG00000011347
GO:0032967	positive regulation of collagen biosynthetic process	biological_process	0.043719	0.86322	2	361	14	15035	ENSGALG00000002987,ENSGALG00000011347
GO:0060089	molecular transducer activity	molecular_function	0.043777	0.86322	29	361	865	15035	ENSGALG00000042308,ENSGALG00000012894,ENSGALG00000023521,ENSGALG00000039461,ENSGALG00000007620,ENSGALG00000037166,ENSGALG00000028304,ENSGALG00000012307,ENSGALG00000000168,ENSGALG00000014716,ENSGALG00000032348,ENSGALG00000015150,ENSGALG00000003005,ENSGALG00000027407,ENSGALG00000013616,ENSGALG00000053747,ENSGALG00000000607,ENSGALG00000004285,ENSGALG00000016699,ENSGALG00000007047,ENSGALG00000032060,…
GO:0032880	regulation of protein localization	biological_process	0.044029	0.86322	20	361	558	15035	ENSGALG00000041640,ENSGALG00000004285,ENSGALG00000030545,ENSGALG00000009003,ENSGALG00000006413,ENSGALG00000016785,ENSGALG00000036497,ENSGALG00000043754,ENSGALG00000038364,ENSGALG00000028770,ENSGALG00000004833,ENSGALG00000011104,ENSGALG00000023521,ENSGALG00000010820,ENSGALG00000042626,ENSGALG00000013616,ENSGALG00000042360,ENSGALG00000014786,ENSGALG00000010179,ENSGALG00000004917
GO:0043588	skin development	biological_process	0.044107	0.86322	6	361	109	15035	ENSGALG00000041555,ENSGALG00000031112,ENSGALG00000010036,ENSGALG00000007047,ENSGALG00000032974,ENSGALG00000014908
GO:0005892	acetylcholine-gated channel complex	cellular_component	0.044107	0.86322	2	361	14	15035	ENSGALG00000003014,ENSGALG00000003005
GO:0002121	inter-male aggressive behavior	biological_process	0.044202	0.86322	1	361	2	15035	ENSGALG00000014944
GO:0002526	acute inflammatory response	biological_process	0.044391	0.86322	3	361	33	15035	ENSGALG00000043064,ENSGALG00000053549,ENSGALG00000010915
GO:0048686	regulation of sprouting of injured axon	biological_process	0.04441	0.86322	1	361	2	15035	ENSGALG00000004526
GO:0048690	regulation of axon extension involved in regeneration	biological_process	0.04441	0.86322	1	361	2	15035	ENSGALG00000004526
GO:0001894	tissue homeostasis	biological_process	0.044416	0.86322	7	361	136	15035	ENSGALG00000053549,ENSGALG00000051882,ENSGALG00000033520,ENSGALG00000040276,ENSGALG00000002503,ENSGALG00000038241,ENSGALG00000011347
GO:0050859	negative regulation of B cell receptor signaling pathway	biological_process	0.044477	0.86322	1	361	2	15035	ENSGALG00000053601
GO:0033037	polysaccharide localization	biological_process	0.044501	0.86322	1	361	2	15035	ENSGALG00000030607
GO:1902724	positive regulation of skeletal muscle satellite cell proliferation	biological_process	0.044518	0.86322	1	361	2	15035	ENSGALG00000033974
GO:0031852	mu-type opioid receptor binding	molecular_function	0.044565	0.86322	1	361	2	15035	ENSGALG00000003163
GO:0051430	corticotropin-releasing hormone receptor 1 binding	molecular_function	0.044565	0.86322	1	361	2	15035	ENSGALG00000003163
GO:0005588	collagen type V trimer	cellular_component	0.044574	0.86322	1	361	2	15035	ENSGALG00000031112
GO:1903225	negative regulation of endodermal cell differentiation	biological_process	0.044574	0.86322	1	361	2	15035	ENSGALG00000031112
GO:0050659	N-acetylgalactosamine 4-sulfate 6-O-sulfotransferase activity	molecular_function	0.044578	0.86322	1	361	2	15035	ENSGALG00000030607
GO:0072534	perineuronal net	cellular_component	0.044708	0.86322	1	361	2	15035	ENSGALG00000004526
GO:0043125	ErbB-3 class receptor binding	molecular_function	0.04485	0.86322	1	361	2	15035	ENSGALG00000014786
GO:0001836	release of cytochrome c from mitochondria	biological_process	0.044872	0.86322	3	361	33	15035	ENSGALG00000006992,ENSGALG00000009179,ENSGALG00000033974
GO:0008349	MAP kinase kinase kinase kinase activity	molecular_function	0.044888	0.86322	1	361	2	15035	ENSGALG00000012321
GO:0014846	esophagus smooth muscle contraction	biological_process	0.044936	0.86322	1	361	2	15035	ENSGALG00000004593
GO:0072008	glomerular mesangial cell differentiation	biological_process	0.044969	0.86322	1	361	2	15035	ENSGALG00000006343
GO:0072144	glomerular mesangial cell development	biological_process	0.044969	0.86322	1	361	2	15035	ENSGALG00000006343
GO:0004923	leukemia inhibitory factor receptor activity	molecular_function	0.044983	0.86322	1	361	2	15035	ENSGALG00000014716
GO:0048861	leukemia inhibitory factor signaling pathway	biological_process	0.044983	0.86322	1	361	2	15035	ENSGALG00000014716
GO:0098923	retrograde trans-synaptic signaling by soluble gas	biological_process	0.045031	0.86322	1	361	2	15035	ENSGALG00000008177
GO:0098924	retrograde trans-synaptic signaling by nitric oxide	biological_process	0.045031	0.86322	1	361	2	15035	ENSGALG00000008177
GO:0035609	C-terminal protein deglutamylation	biological_process	0.045074	0.86322	1	361	2	15035	ENSGALG00000017234
GO:0002114	interleukin-33 receptor activity	molecular_function	0.045131	0.86322	1	361	2	15035	ENSGALG00000016785
GO:0038172	interleukin-33-mediated signaling pathway	biological_process	0.045131	0.86322	1	361	2	15035	ENSGALG00000016785
GO:0045976	negative regulation of mitotic cell cycle, embryonic	biological_process	0.045162	0.86322	1	361	2	15035	ENSGALG00000042308
GO:0034338	short-chain carboxylesterase activity	molecular_function	0.045178	0.86322	1	361	2	15035	ENSGALG00000014938
GO:0051793	medium-chain fatty acid catabolic process	biological_process	0.045178	0.86322	1	361	2	15035	ENSGALG00000014938
GO:0004630	phospholipase D activity	molecular_function	0.045181	0.86322	1	361	2	15035	ENSGALG00000029836
GO:0140192	regulation of adenylate cyclase-activating adrenergic receptor signaling pathway involved in heart process	biological_process	0.045192	0.86322	1	361	2	15035	ENSGALG00000008177
GO:0006741	NADP biosynthetic process	biological_process	0.045201	0.86322	1	361	2	15035	ENSGALG00000003558
GO:0004921	interleukin-11 receptor activity	molecular_function	0.045223	0.86322	1	361	2	15035	ENSGALG00000014716
GO:0019970	interleukin-11 binding	molecular_function	0.045223	0.86322	1	361	2	15035	ENSGALG00000014716
GO:0038154	interleukin-11-mediated signaling pathway	biological_process	0.045223	0.86322	1	361	2	15035	ENSGALG00000014716
GO:0046849	bone remodeling	biological_process	0.045224	0.86322	4	361	56	15035	ENSGALG00000053549,ENSGALG00000033520,ENSGALG00000011347,ENSGALG00000038241
GO:0106071	positive regulation of adenylate cyclase-activating G-protein coupled receptor signaling pathway	biological_process	0.045329	0.86322	1	361	2	15035	ENSGALG00000008177
GO:0045163	clustering of voltage-gated potassium channels	biological_process	0.045336	0.86322	1	361	2	15035	ENSGALG00000000653
GO:0010746	regulation of plasma membrane long-chain fatty acid transport	biological_process	0.045447	0.86322	1	361	2	15035	ENSGALG00000009626
GO:0010748	negative regulation of plasma membrane long-chain fatty acid transport	biological_process	0.045447	0.86322	1	361	2	15035	ENSGALG00000009626
GO:0015911	plasma membrane long-chain fatty acid transport	biological_process	0.045447	0.86322	1	361	2	15035	ENSGALG00000009626
GO:1902001	fatty acid transmembrane transport	biological_process	0.045447	0.86322	1	361	2	15035	ENSGALG00000009626
GO:2000192	negative regulation of fatty acid transport	biological_process	0.045447	0.86322	1	361	2	15035	ENSGALG00000009626
GO:2001027	negative regulation of endothelial cell chemotaxis	biological_process	0.045485	0.86322	1	361	2	15035	ENSGALG00000009626
GO:0005900	oncostatin-M receptor complex	cellular_component	0.04554	0.86322	1	361	2	15035	ENSGALG00000014716
GO:0010751	negative regulation of nitric oxide mediated signal transduction	biological_process	0.045613	0.86322	1	361	2	15035	ENSGALG00000009626
GO:0061383	trabecula morphogenesis	biological_process	0.045617	0.86322	3	361	34	15035	ENSGALG00000014686,ENSGALG00000037522,ENSGALG00000041555
GO:1903553	positive regulation of extracellular exosome assembly	biological_process	0.045634	0.86322	1	361	2	15035	ENSGALG00000016480
GO:1903707	negative regulation of hemopoiesis	biological_process	0.04566	0.86322	5	361	81	15035	ENSGALG00000014786,ENSGALG00000036142,ENSGALG00000003670,ENSGALG00000008306,ENSGALG00000011347
GO:0060133	somatotropin secreting cell development	biological_process	0.04577	0.86322	1	361	2	15035	ENSGALG00000015495
GO:0034483	heparan sulfate sulfotransferase activity	molecular_function	0.045771	0.86322	2	361	15	15035	ENSGALG00000031058,ENSGALG00000001371
GO:0034362	low-density lipoprotein particle	cellular_component	0.04583	0.86322	1	361	2	15035	ENSGALG00000016713
GO:0045919	positive regulation of cytolysis	biological_process	0.045858	0.86322	1	361	2	15035	ENSGALG00000029836
GO:0070052	collagen V binding	molecular_function	0.045926	0.86322	1	361	2	15035	ENSGALG00000009626
GO:0016167	glial cell-derived neurotrophic factor receptor activity	molecular_function	0.046013	0.86322	1	361	2	15035	ENSGALG00000016296
GO:1903677	regulation of cap-independent translational initiation	biological_process	0.046058	0.86322	1	361	2	15035	ENSGALG00000034831
GO:1903679	positive regulation of cap-independent translational initiation	biological_process	0.046058	0.86322	1	361	2	15035	ENSGALG00000034831
GO:1904688	regulation of cytoplasmic translational initiation	biological_process	0.046058	0.86322	1	361	2	15035	ENSGALG00000034831
GO:1904690	positive regulation of cytoplasmic translational initiation	biological_process	0.046058	0.86322	1	361	2	15035	ENSGALG00000034831
GO:0046469	platelet activating factor metabolic process	biological_process	0.046067	0.86322	1	361	2	15035	ENSGALG00000016713
GO:0048592	eye morphogenesis	biological_process	0.046093	0.86322	6	361	110	15035	ENSGALG00000011347,ENSGALG00000031112,ENSGALG00000015253,ENSGALG00000014686,ENSGALG00000015150,ENSGALG00000041640
GO:0099538	synaptic signaling via neuropeptide	biological_process	0.046147	0.86322	1	361	2	15035	ENSGALG00000042626
GO:0099540	trans-synaptic signaling by neuropeptide	biological_process	0.046147	0.86322	1	361	2	15035	ENSGALG00000042626
GO:0010800	positive regulation of peptidyl-threonine phosphorylation	biological_process	0.046198	0.86322	2	361	15	15035	ENSGALG00000006413,ENSGALG00000011104
GO:0070256	negative regulation of mucus secretion	biological_process	0.046265	0.86322	1	361	2	15035	ENSGALG00000000168
GO:0048284	organelle fusion	biological_process	0.046269	0.86322	5	361	83	15035	ENSGALG00000042626,ENSGALG00000009003,ENSGALG00000015332,ENSGALG00000004917,ENSGALG00000011673
GO:0002071	glandular epithelial cell maturation	biological_process	0.046381	0.86322	1	361	2	15035	ENSGALG00000010179
GO:0031201	SNARE complex	cellular_component	0.046506	0.86322	3	361	34	15035	ENSGALG00000011673,ENSGALG00000009003,ENSGALG00000015332
GO:0003062	regulation of heart rate by chemical signal	biological_process	0.046513	0.86322	1	361	2	15035	ENSGALG00000003521
GO:0098877	neurotransmitter receptor transport to plasma membrane	biological_process	0.046608	0.86322	2	361	15	15035	ENSGALG00000009003,ENSGALG00000015332
GO:0098969	neurotransmitter receptor transport to postsynaptic membrane	biological_process	0.046608	0.86322	2	361	15	15035	ENSGALG00000009003,ENSGALG00000015332
GO:1903540	establishment of protein localization to postsynaptic membrane	biological_process	0.046608	0.86322	2	361	15	15035	ENSGALG00000009003,ENSGALG00000015332
GO:0097191	extrinsic apoptotic signaling pathway	biological_process	0.04665	0.86322	7	361	138	15035	ENSGALG00000040045,ENSGALG00000029819,ENSGALG00000016296,ENSGALG00000014786,ENSGALG00000009179,ENSGALG00000009626,ENSGALG00000033974
GO:0004457	lactate dehydrogenase activity	molecular_function	0.046668	0.86322	1	361	2	15035	ENSGALG00000006300
GO:0004459	L-lactate dehydrogenase activity	molecular_function	0.046668	0.86322	1	361	2	15035	ENSGALG00000006300
GO:0042132	fructose 1,6-bisphosphate 1-phosphatase activity	molecular_function	0.046695	0.86322	1	361	2	15035	ENSGALG00000012613
GO:0034774	secretory granule lumen	cellular_component	0.046825	0.86322	1	361	2	15035	ENSGALG00000040045
GO:0060205	cytoplasmic vesicle lumen	cellular_component	0.046825	0.86322	1	361	2	15035	ENSGALG00000040045
GO:0015817	histidine transport	biological_process	0.046873	0.86322	1	361	2	15035	ENSGALG00000028871
GO:1903319	positive regulation of protein maturation	biological_process	0.046878	0.86322	2	361	15	15035	ENSGALG00000000653,ENSGALG00000036497
GO:2000418	positive regulation of eosinophil migration	biological_process	0.046893	0.86322	1	361	2	15035	ENSGALG00000053549
GO:0048073	regulation of eye pigmentation	biological_process	0.046898	0.86322	1	361	2	15035	ENSGALG00000011347
GO:0045622	regulation of T-helper cell differentiation	biological_process	0.046911	0.86322	2	361	15	15035	ENSGALG00000036142,ENSGALG00000013956
GO:0031092	platelet alpha granule membrane	cellular_component	0.046937	0.86322	1	361	2	15035	ENSGALG00000004184
GO:0034239	regulation of macrophage fusion	biological_process	0.046967	0.86322	1	361	2	15035	ENSGALG00000033520
GO:0034241	positive regulation of macrophage fusion	biological_process	0.046967	0.86322	1	361	2	15035	ENSGALG00000033520
GO:0070741	response to interleukin-6	biological_process	0.047053	0.86322	2	361	15	15035	ENSGALG00000014716,ENSGALG00000037522
GO:0071354	cellular response to interleukin-6	biological_process	0.047053	0.86322	2	361	15	15035	ENSGALG00000037522,ENSGALG00000014716
GO:0072380	TRC complex	cellular_component	0.047085	0.86322	1	361	2	15035	ENSGALG00000014768
GO:1903334	positive regulation of protein folding	biological_process	0.047085	0.86322	1	361	2	15035	ENSGALG00000014768
GO:1903646	positive regulation of chaperone-mediated protein folding	biological_process	0.047085	0.86322	1	361	2	15035	ENSGALG00000014768
GO:0008484	sulfuric ester hydrolase activity	molecular_function	0.047178	0.86322	2	361	15	15035	ENSGALG00000009856,ENSGALG00000004593
GO:0060284	regulation of cell development	biological_process	0.047205	0.86322	20	361	568	15035	ENSGALG00000042308,ENSGALG00000034831,ENSGALG00000014716,ENSGALG00000008177,ENSGALG00000010179,ENSGALG00000010331,ENSGALG00000013616,ENSGALG00000016905,ENSGALG00000042626,ENSGALG00000000909,ENSGALG00000011242,ENSGALG00000000607,ENSGALG00000007047,ENSGALG00000000653,ENSGALG00000008614,ENSGALG00000004526,ENSGALG00000047554,ENSGALG00000039690,ENSGALG00000009003,ENSGALG00000011347
GO:0030197	extracellular matrix constituent, lubricant activity	molecular_function	0.047219	0.86322	1	361	2	15035	ENSGALG00000051882
GO:0030316	osteoclast differentiation	biological_process	0.047245	0.86322	4	361	58	15035	ENSGALG00000003670,ENSGALG00000037522,ENSGALG00000014786,ENSGALG00000033520
GO:0071133	alpha9-beta1 integrin-ADAM8 complex	cellular_component	0.047277	0.86322	1	361	2	15035	ENSGALG00000053549
GO:2000406	positive regulation of T cell migration	biological_process	0.047486	0.86322	2	361	15	15035	ENSGALG00000053549,ENSGALG00000003003
GO:1990079	cartilage homeostasis	biological_process	0.047596	0.86322	1	361	2	15035	ENSGALG00000040276
GO:0007612	learning	biological_process	0.047638	0.86322	5	361	85	15035	ENSGALG00000009003,ENSGALG00000005707,ENSGALG00000004526,ENSGALG00000040045,ENSGALG00000000653
GO:0004915	interleukin-6 receptor activity	molecular_function	0.04764	0.86322	1	361	2	15035	ENSGALG00000014716
GO:0005896	interleukin-6 receptor complex	cellular_component	0.04764	0.86322	1	361	2	15035	ENSGALG00000014716
GO:0019981	interleukin-6 binding	molecular_function	0.04764	0.86322	1	361	2	15035	ENSGALG00000014716
GO:0010624	regulation of Schwann cell proliferation	biological_process	0.047695	0.86322	1	361	2	15035	ENSGALG00000000909
GO:0015111	iodide transmembrane transporter activity	molecular_function	0.047746	0.86322	1	361	2	15035	ENSGALG00000041932
GO:0015705	iodide transport	biological_process	0.047746	0.86322	1	361	2	15035	ENSGALG00000041932
GO:0001880	Mullerian duct regression	biological_process	0.047775	0.86322	1	361	2	15035	ENSGALG00000036346
GO:0046208	spermine catabolic process	biological_process	0.047841	0.86322	1	361	2	15035	ENSGALG00000015977
GO:0046592	polyamine oxidase activity	molecular_function	0.047841	0.86322	1	361	2	15035	ENSGALG00000015977
GO:0010604	positive regulation of macromolecule metabolic process	biological_process	0.047857	0.86322	62	361	2120	15035	ENSGALG00000003106,ENSGALG00000015898,ENSGALG00000001518,ENSGALG00000026098,ENSGALG00000010179,ENSGALG00000014786,ENSGALG00000008177,ENSGALG00000006453,ENSGALG00000001191,ENSGALG00000014716,ENSGALG00000038241,ENSGALG00000003003,ENSGALG00000009626,ENSGALG00000013956,ENSGALG00000011347,ENSGALG00000041555,ENSGALG00000047554,ENSGALG00000049157,ENSGALG00000040672,ENSGALG00000031343,ENSGALG00000038405,…
GO:0016755	transferase activity, transferring amino-acyl groups	molecular_function	0.047878	0.86322	2	361	15	15035	ENSGALG00000012802,ENSGALG00000006775
GO:0050542	icosanoid binding	molecular_function	0.047882	0.86322	1	361	2	15035	ENSGALG00000043064
GO:0050543	icosatetraenoic acid binding	molecular_function	0.047882	0.86322	1	361	2	15035	ENSGALG00000043064
GO:0050544	arachidonic acid binding	molecular_function	0.047882	0.86322	1	361	2	15035	ENSGALG00000043064
GO:0003420	regulation of growth plate cartilage chondrocyte proliferation	biological_process	0.047904	0.86322	1	361	2	15035	ENSGALG00000011347
GO:1902733	regulation of growth plate cartilage chondrocyte differentiation	biological_process	0.047904	0.86322	1	361	2	15035	ENSGALG00000011347
GO:1902738	regulation of chondrocyte differentiation involved in endochondral bone morphogenesis	biological_process	0.047904	0.86322	1	361	2	15035	ENSGALG00000011347
GO:1903041	regulation of chondrocyte hypertrophy	biological_process	0.047904	0.86322	1	361	2	15035	ENSGALG00000011347
GO:1903042	negative regulation of chondrocyte hypertrophy	biological_process	0.047904	0.86322	1	361	2	15035	ENSGALG00000011347
GO:0003289	atrial septum primum morphogenesis	biological_process	0.047947	0.86322	1	361	2	15035	ENSGALG00000036497
GO:0042769	DNA damage response, detection of DNA damage	biological_process	0.047952	0.86322	1	361	2	15035	ENSGALG00000036497
GO:0048523	negative regulation of cellular process	biological_process	0.047955	0.86322	81	361	2865	15035	ENSGALG00000043064,ENSGALG00000011214,ENSGALG00000026098,ENSGALG00000000168,ENSGALG00000006453,ENSGALG00000010820,ENSGALG00000009626,ENSGALG00000011347,ENSGALG00000041555,ENSGALG00000033520,ENSGALG00000029836,ENSGALG00000000607,ENSGALG00000028721,ENSGALG00000000653,ENSGALG00000004285,ENSGALG00000003670,ENSGALG00000027407,ENSGALG00000053549,ENSGALG00000015150,ENSGALG00000027053,ENSGALG00000040276,…
GO:0043379	memory T cell differentiation	biological_process	0.047963	0.86322	1	361	2	15035	ENSGALG00000008306
GO:0043380	regulation of memory T cell differentiation	biological_process	0.047963	0.86322	1	361	2	15035	ENSGALG00000008306
GO:0090715	immunological memory formation process	biological_process	0.047963	0.86322	1	361	2	15035	ENSGALG00000008306
GO:0070245	positive regulation of thymocyte apoptotic process	biological_process	0.048047	0.86322	1	361	2	15035	ENSGALG00000053549
GO:0099510	calcium ion binding involved in regulation of cytosolic calcium ion concentration	molecular_function	0.048077	0.86322	1	361	2	15035	ENSGALG00000026903
GO:0099534	calcium ion binding involved in regulation of presynaptic cytosolic calcium ion concentration	molecular_function	0.048077	0.86322	1	361	2	15035	ENSGALG00000026903
GO:0002826	negative regulation of T-helper 1 type immune response	biological_process	0.04811	0.86322	1	361	2	15035	ENSGALG00000016785
GO:1990393	3M complex	cellular_component	0.048183	0.86322	1	361	2	15035	ENSGALG00000011242
GO:0031018	endocrine pancreas development	biological_process	0.048278	0.86322	3	361	34	15035	ENSGALG00000010179,ENSGALG00000036497,ENSGALG00000004285
GO:0003847	1-alkyl-2-acetylglycerophosphocholine esterase activity	molecular_function	0.048315	0.86322	1	361	2	15035	ENSGALG00000016713
GO:0060279	positive regulation of ovulation	biological_process	0.048366	0.86322	1	361	2	15035	ENSGALG00000028770
GO:0046637	regulation of alpha-beta T cell differentiation	biological_process	0.04841	0.86322	3	361	35	15035	ENSGALG00000011347,ENSGALG00000013956,ENSGALG00000036142
GO:0032812	positive regulation of epinephrine secretion	biological_process	0.048439	0.86322	1	361	2	15035	ENSGALG00000038241
GO:0043511	inhibin complex	cellular_component	0.048478	0.86322	1	361	2	15035	ENSGALG00000054770
GO:0043512	inhibin A complex	cellular_component	0.048478	0.86322	1	361	2	15035	ENSGALG00000054770
GO:0002823	negative regulation of adaptive immune response based on somatic recombination of immune receptors built from immunoglobulin superfamily domains	biological_process	0.048487	0.86322	2	361	15	15035	ENSGALG00000016785,ENSGALG00000036142
GO:0008418	protein-N-terminal asparagine amidohydrolase activity	molecular_function	0.048488	0.86322	1	361	2	15035	ENSGALG00000040905
GO:0070539	linoleic acid binding	molecular_function	0.04849	0.86322	1	361	2	15035	ENSGALG00000043064
GO:0035359	negative regulation of peroxisome proliferator activated receptor signaling pathway	biological_process	0.048529	0.86322	1	361	2	15035	ENSGALG00000041640
GO:0002360	T cell lineage commitment	biological_process	0.04857	0.86322	2	361	15	15035	ENSGALG00000036142,ENSGALG00000010915
GO:0036505	prosaposin receptor activity	molecular_function	0.048699	0.86322	1	361	2	15035	ENSGALG00000000607
GO:0009636	response to toxic substance	biological_process	0.048705	0.86322	9	361	198	15035	ENSGALG00000003005,ENSGALG00000040045,ENSGALG00000009289,ENSGALG00000018557,ENSGALG00000013616,ENSGALG00000000607,ENSGALG00000003014,ENSGALG00000033974,ENSGALG00000013094
GO:0097366	response to bronchodilator	biological_process	0.048731	0.86322	2	361	15	15035	ENSGALG00000040045,ENSGALG00000009289
GO:0048265	response to pain	biological_process	0.048751	0.86322	2	361	15	15035	ENSGALG00000040045,ENSGALG00000003560
GO:0034441	plasma lipoprotein particle oxidation	biological_process	0.048797	0.86322	1	361	2	15035	ENSGALG00000016713
GO:0051365	cellular response to potassium ion starvation	biological_process	0.048801	0.86322	1	361	2	15035	ENSGALG00000028871
GO:0061402	positive regulation of transcription from RNA polymerase II promoter in response to acidic pH	biological_process	0.048801	0.86322	1	361	2	15035	ENSGALG00000028871
GO:0030204	chondroitin sulfate metabolic process	biological_process	0.048868	0.86322	2	361	15	15035	ENSGALG00000030607,ENSGALG00000024056
GO:0004974	leukotriene receptor activity	molecular_function	0.048888	0.86322	1	361	2	15035	ENSGALG00000032348
GO:0006867	asparagine transport	biological_process	0.048955	0.86322	1	361	2	15035	ENSGALG00000028871
GO:0015182	L-asparagine transmembrane transporter activity	molecular_function	0.048955	0.86322	1	361	2	15035	ENSGALG00000028871
GO:0019732	antifungal humoral response	biological_process	0.049049	0.86322	1	361	2	15035	ENSGALG00000006453
GO:0051569	regulation of histone H3-K4 methylation	biological_process	0.049079	0.86322	2	361	16	15035	ENSGALG00000013956,ENSGALG00000011104
GO:0031769	glucagon receptor binding	molecular_function	0.049114	0.86322	1	361	2	15035	ENSGALG00000011104
GO:0006968	cellular defense response	biological_process	0.04915	0.86322	1	361	2	15035	ENSGALG00000026098
GO:2000328	regulation of T-helper 17 cell lineage commitment	biological_process	0.049152	0.86322	1	361	2	15035	ENSGALG00000036142
GO:2000329	negative regulation of T-helper 17 cell lineage commitment	biological_process	0.049152	0.86322	1	361	2	15035	ENSGALG00000036142
GO:0010813	neuropeptide catabolic process	biological_process	0.049229	0.86367	1	361	2	15035	ENSGALG00000031343
GO:0045569	TRAIL binding	molecular_function	0.049265	0.86367	1	361	2	15035	ENSGALG00000009179
GO:0097450	astrocyte end-foot	cellular_component	0.049409	0.86538	1	361	2	15035	ENSGALG00000000909
GO:0040037	negative regulation of fibroblast growth factor receptor signaling pathway	biological_process	0.04945	0.86538	2	361	15	15035	ENSGALG00000009626,ENSGALG00000004593
GO:0033081	regulation of T cell differentiation in thymus	biological_process	0.049505	0.86557	2	361	15	15035	ENSGALG00000053549,ENSGALG00000011347
GO:0003199	endocardial cushion to mesenchymal transition involved in heart valve formation	biological_process	0.049641	0.86654	1	361	2	15035	ENSGALG00000041640
GO:0000293	ferric-chelate reductase activity	molecular_function	0.049676	0.86654	1	361	2	15035	ENSGALG00000024031
GO:0016638	oxidoreductase activity, acting on the CH-NH2 group of donors	molecular_function	0.049692	0.86654	2	361	15	15035	ENSGALG00000013090,ENSGALG00000036142
GO:1902606	regulation of large conductance calcium-activated potassium channel activity	biological_process	0.049958	0.8671	1	361	2	15035	ENSGALG00000007047
GO:1902608	positive regulation of large conductance calcium-activated potassium channel activity	biological_process	0.049958	0.8671	1	361	2	15035	ENSGALG00000007047
GO:2000276	negative regulation of oxidative phosphorylation uncoupler activity	biological_process	0.050027	0.8671	1	361	2	15035	ENSGALG00000041640
GO:0036342	post-anal tail morphogenesis	biological_process	0.050062	0.8671	2	361	15	15035	ENSGALG00000042308,ENSGALG00000030607
GO:0061025	membrane fusion	biological_process	0.050154	0.8671	6	361	112	15035	ENSGALG00000042626,ENSGALG00000015332,ENSGALG00000009003,ENSGALG00000004917,ENSGALG00000011673,ENSGALG00000033520
GO:0010632	regulation of epithelial cell migration	biological_process	0.050162	0.8671	7	361	142	15035	ENSGALG00000006992,ENSGALG00000029836,ENSGALG00000009626,ENSGALG00000004184,ENSGALG00000043754,ENSGALG00000036189,ENSGALG00000000364
GO:0002237	response to molecule of bacterial origin	biological_process	0.050197	0.8671	7	361	139	15035	ENSGALG00000006453,ENSGALG00000043064,ENSGALG00000026098,ENSGALG00000012396,ENSGALG00000012801,ENSGALG00000008177,ENSGALG00000037522
GO:0002687	positive regulation of leukocyte migration	biological_process	0.050277	0.8671	4	361	58	15035	ENSGALG00000003003,ENSGALG00000012456,ENSGALG00000053549,ENSGALG00000016713
GO:0048477	oogenesis	biological_process	0.05031	0.8671	4	361	58	15035	ENSGALG00000034831,ENSGALG00000011347,ENSGALG00000001559,ENSGALG00000028770
GO:0048661	positive regulation of smooth muscle cell proliferation	biological_process	0.050349	0.8671	3	361	35	15035	ENSGALG00000002987,ENSGALG00000006992,ENSGALG00000009626
GO:0071603	endothelial cell-cell adhesion	biological_process	0.050368	0.8671	1	361	2	15035	ENSGALG00000038364
GO:1904027	negative regulation of collagen fibril organization	biological_process	0.050403	0.8671	1	361	2	15035	ENSGALG00000004833
GO:1901020	negative regulation of calcium ion transmembrane transporter activity	biological_process	0.050428	0.8671	2	361	15	15035	ENSGALG00000032506,ENSGALG00000048923
GO:0004035	alkaline phosphatase activity	molecular_function	0.050513	0.8671	1	361	2	15035	ENSGALG00000023542
GO:0008459	chondroitin 6-sulfotransferase activity	molecular_function	0.050612	0.8671	1	361	2	15035	ENSGALG00000024056
GO:0061302	smooth muscle cell-matrix adhesion	biological_process	0.050629	0.8671	1	361	2	15035	ENSGALG00000003589
GO:0046882	negative regulation of follicle-stimulating hormone secretion	biological_process	0.050697	0.8671	1	361	2	15035	ENSGALG00000028770
GO:0090075	relaxation of muscle	biological_process	0.05078	0.8671	2	361	15	15035	ENSGALG00000015028,ENSGALG00000010820
GO:0015878	biotin transport	biological_process	0.050829	0.8671	1	361	2	15035	ENSGALG00000040541
GO:0035985	senescence-associated heterochromatin focus	cellular_component	0.050865	0.8671	1	361	2	15035	ENSGALG00000026137
GO:0035986	senescence-associated heterochromatin focus assembly	biological_process	0.050865	0.8671	1	361	2	15035	ENSGALG00000026137
GO:0035804	structural constituent of egg coat	molecular_function	0.050877	0.8671	1	361	2	15035	ENSGALG00000001559
GO:0031016	pancreas development	biological_process	0.050882	0.8671	4	361	58	15035	ENSGALG00000004285,ENSGALG00000036497,ENSGALG00000010179,ENSGALG00000011347
GO:0021571	rhombomere 5 development	biological_process	0.050886	0.8671	1	361	2	15035	ENSGALG00000003670
GO:0035283	central nervous system segmentation	biological_process	0.050886	0.8671	1	361	2	15035	ENSGALG00000003670
GO:0035284	brain segmentation	biological_process	0.050886	0.8671	1	361	2	15035	ENSGALG00000003670
GO:0071881	adenylate cyclase-inhibiting adrenergic receptor signaling pathway	biological_process	0.050908	0.8671	1	361	2	15035	ENSGALG00000023521
GO:0014013	regulation of gliogenesis	biological_process	0.051853	0.88244	4	361	59	15035	ENSGALG00000014716,ENSGALG00000000909,ENSGALG00000000653,ENSGALG00000000607
GO:0050805	negative regulation of synaptic transmission	biological_process	0.052035	0.88478	3	361	37	15035	ENSGALG00000042626,ENSGALG00000000168,ENSGALG00000004526
GO:0003181	atrioventricular valve morphogenesis	biological_process	0.052581	0.89329	2	361	16	15035	ENSGALG00000041640,ENSGALG00000036497
GO:0010720	positive regulation of cell development	biological_process	0.052757	0.89551	12	361	301	15035	ENSGALG00000014716,ENSGALG00000042308,ENSGALG00000011242,ENSGALG00000011347,ENSGALG00000042626,ENSGALG00000000909,ENSGALG00000047554,ENSGALG00000039690,ENSGALG00000016905,ENSGALG00000013616,ENSGALG00000010331,ENSGALG00000010179
GO:0060219	camera-type eye photoreceptor cell differentiation	biological_process	0.052951	0.89803	2	361	16	15035	ENSGALG00000015150,ENSGALG00000011347
GO:0032332	positive regulation of chondrocyte differentiation	biological_process	0.053278	0.90281	2	361	16	15035	ENSGALG00000043064,ENSGALG00000040276
GO:0001704	formation of primary germ layer	biological_process	0.053378	0.90331	5	361	86	15035	ENSGALG00000015908,ENSGALG00000015253,ENSGALG00000006992,ENSGALG00000031112,ENSGALG00000003589
GO:0016049	cell growth	biological_process	0.053399	0.90331	11	361	268	15035	ENSGALG00000038364,ENSGALG00000033520,ENSGALG00000040672,ENSGALG00000004526,ENSGALG00000011347,ENSGALG00000042626,ENSGALG00000026137,ENSGALG00000004285,ENSGALG00000007047,ENSGALG00000012613,ENSGALG00000008614
GO:0000413	protein peptidyl-prolyl isomerization	biological_process	0.05353	0.90397	3	361	35	15035	ENSGALG00000011181,ENSGALG00000037669,ENSGALG00000025764
GO:0003755	peptidyl-prolyl cis-trans isomerase activity	molecular_function	0.05353	0.90397	3	361	35	15035	ENSGALG00000025764,ENSGALG00000037669,ENSGALG00000011181
GO:0032760	positive regulation of tumor necrosis factor production	biological_process	0.053699	0.90605	3	361	36	15035	ENSGALG00000014786,ENSGALG00000041640,ENSGALG00000009626
GO:0048483	autonomic nervous system development	biological_process	0.054113	0.91226	3	361	36	15035	ENSGALG00000036497,ENSGALG00000042308,ENSGALG00000007620
GO:0002820	negative regulation of adaptive immune response	biological_process	0.054279	0.91429	2	361	16	15035	ENSGALG00000036142,ENSGALG00000016785
GO:1903205	regulation of hydrogen peroxide-induced cell death	biological_process	0.054617	0.91919	2	361	16	15035	ENSGALG00000000607,ENSGALG00000033974
GO:0032413	negative regulation of ion transmembrane transporter activity	biological_process	0.054862	0.92207	3	361	36	15035	ENSGALG00000048923,ENSGALG00000032506,ENSGALG00000006992
GO:0048660	regulation of smooth muscle cell proliferation	biological_process	0.054946	0.92207	4	361	60	15035	ENSGALG00000009626,ENSGALG00000006992,ENSGALG00000003521,ENSGALG00000002987
GO:0061669	spontaneous neurotransmitter secretion	biological_process	0.054973	0.92207	1	361	3	15035	ENSGALG00000004917
GO:0045109	intermediate filament organization	biological_process	0.054974	0.92207	2	361	16	15035	ENSGALG00000000299,ENSGALG00000000909
GO:0044449	contractile fiber part	cellular_component	0.055123	0.92249	6	361	117	15035	ENSGALG00000008177,ENSGALG00000028721,ENSGALG00000011086,ENSGALG00000000653,ENSGALG00000006343,ENSGALG00000043555
GO:0010712	regulation of collagen metabolic process	biological_process	0.055141	0.92249	2	361	16	15035	ENSGALG00000002987,ENSGALG00000011347
GO:0001816	cytokine production	biological_process	0.055177	0.92249	14	361	366	15035	ENSGALG00000023521,ENSGALG00000041640,ENSGALG00000010820,ENSGALG00000033974,ENSGALG00000006453,ENSGALG00000014786,ENSGALG00000053549,ENSGALG00000016785,ENSGALG00000028770,ENSGALG00000040045,ENSGALG00000002987,ENSGALG00000004593,ENSGALG00000009626,ENSGALG00000033256
GO:0033619	membrane protein proteolysis	biological_process	0.055186	0.92249	3	361	37	15035	ENSGALG00000029836,ENSGALG00000023521,ENSGALG00000053549
GO:0005802	trans-Golgi network	cellular_component	0.055305	0.92251	7	361	144	15035	ENSGALG00000010331,ENSGALG00000004642,ENSGALG00000043172,ENSGALG00000024056,ENSGALG00000009003,ENSGALG00000033256,ENSGALG00000040463
GO:0001819	positive regulation of cytokine production	biological_process	0.055319	0.92251	9	361	203	15035	ENSGALG00000033974,ENSGALG00000041640,ENSGALG00000023521,ENSGALG00000009626,ENSGALG00000002987,ENSGALG00000004593,ENSGALG00000053549,ENSGALG00000016785,ENSGALG00000014786
GO:0060429	epithelium development	biological_process	0.055327	0.92251	23	361	679	15035	ENSGALG00000004285,ENSGALG00000010036,ENSGALG00000007047,ENSGALG00000006821,ENSGALG00000000364,ENSGALG00000031997,ENSGALG00000041640,ENSGALG00000033974,ENSGALG00000006992,ENSGALG00000014908,ENSGALG00000006343,ENSGALG00000036497,ENSGALG00000043555,ENSGALG00000011347,ENSGALG00000005707,ENSGALG00000047554,ENSGALG00000042308,ENSGALG00000001191,ENSGALG00000036798,ENSGALG00000006775,ENSGALG00000010179,…
GO:0060343	trabecula formation	biological_process	0.055566	0.92564	2	361	16	15035	ENSGALG00000014686,ENSGALG00000041555
GO:0021782	glial cell development	biological_process	0.055608	0.92564	4	361	61	15035	ENSGALG00000000909,ENSGALG00000000653,ENSGALG00000036497,ENSGALG00000054783
GO:0030425	dendrite	cellular_component	0.05599	0.93121	11	361	272	15035	ENSGALG00000010331,ENSGALG00000006221,ENSGALG00000042626,ENSGALG00000005707,ENSGALG00000016804,ENSGALG00000042308,ENSGALG00000026903,ENSGALG00000012894,ENSGALG00000000168,ENSGALG00000003163,ENSGALG00000014716
GO:1902476	chloride transmembrane transport	biological_process	0.056487	0.93868	4	361	62	15035	ENSGALG00000000745,ENSGALG00000027423,ENSGALG00000007959,ENSGALG00000033638
GO:0042446	hormone biosynthetic process	biological_process	0.057101	0.94673	3	361	37	15035	ENSGALG00000017216,ENSGALG00000002893,ENSGALG00000016804
GO:0097447	dendritic tree	cellular_component	0.057114	0.94673	11	361	273	15035	ENSGALG00000005707,ENSGALG00000042626,ENSGALG00000006221,ENSGALG00000010331,ENSGALG00000003163,ENSGALG00000014716,ENSGALG00000000168,ENSGALG00000026903,ENSGALG00000042308,ENSGALG00000012894,ENSGALG00000016804
GO:0022848	acetylcholine-gated cation-selective channel activity	molecular_function	0.057115	0.94673	2	361	16	15035	ENSGALG00000003014,ENSGALG00000003005
GO:0090288	negative regulation of cellular response to growth factor stimulus	biological_process	0.057529	0.95279	6	361	115	15035	ENSGALG00000009626,ENSGALG00000004593,ENSGALG00000019312,ENSGALG00000006821,ENSGALG00000030607,ENSGALG00000014686
GO:0098552	side of membrane	cellular_component	0.057725	0.95525	12	361	302	15035	ENSGALG00000051054,ENSGALG00000007620,ENSGALG00000012092,ENSGALG00000016480,ENSGALG00000014716,ENSGALG00000003163,ENSGALG00000016785,ENSGALG00000016296,ENSGALG00000031343,ENSGALG00000032506,ENSGALG00000009003,ENSGALG00000009626
GO:2000756	regulation of peptidyl-lysine acetylation	biological_process	0.057814	0.95591	3	361	38	15035	ENSGALG00000041640,ENSGALG00000036497,ENSGALG00000008177
GO:2000758	positive regulation of peptidyl-lysine acetylation	biological_process	0.057924	0.95692	2	361	17	15035	ENSGALG00000036497,ENSGALG00000008177
GO:0048786	presynaptic active zone	cellular_component	0.058065	0.95846	3	361	39	15035	ENSGALG00000042308,ENSGALG00000011673,ENSGALG00000039659
GO:0030511	positive regulation of transforming growth factor beta receptor signaling pathway	biological_process	0.058402	0.962	2	361	17	15035	ENSGALG00000043555,ENSGALG00000009626
GO:1903846	positive regulation of cellular response to transforming growth factor beta stimulus	biological_process	0.058402	0.962	2	361	17	15035	ENSGALG00000043555,ENSGALG00000009626
GO:0043679	axon terminus	cellular_component	0.058425	0.962	3	361	37	15035	ENSGALG00000009289,ENSGALG00000015332,ENSGALG00000001693
GO:0050779	RNA destabilization	biological_process	0.058872	0.96774	2	361	17	15035	ENSGALG00000034831,ENSGALG00000002121
GO:0061157	mRNA destabilization	biological_process	0.058872	0.96774	2	361	17	15035	ENSGALG00000002121,ENSGALG00000034831
GO:0031347	regulation of defense response	biological_process	0.059327	0.97442	12	361	302	15035	ENSGALG00000026098,ENSGALG00000027786,ENSGALG00000053549,ENSGALG00000016785,ENSGALG00000037522,ENSGALG00000012481,ENSGALG00000038364,ENSGALG00000015833,ENSGALG00000000168,ENSGALG00000033974,ENSGALG00000006453,ENSGALG00000008306
GO:0046943	carboxylic acid transmembrane transporter activity	molecular_function	0.05941	0.97496	6	361	117	15035	ENSGALG00000041122,ENSGALG00000007959,ENSGALG00000028871,ENSGALG00000033638,ENSGALG00000000745,ENSGALG00000027423
GO:0050650	chondroitin sulfate proteoglycan biosynthetic process	biological_process	0.059759	0.97988	2	361	17	15035	ENSGALG00000024056,ENSGALG00000030607
GO:0015318	inorganic molecular entity transmembrane transporter activity	molecular_function	0.059826	0.98016	22	361	651	15035	XLOC_023902,ENSGALG00000007959,ENSGALG00000011040,ENSGALG00000041122,ENSGALG00000003014,ENSGALG00000000745,ENSGALG00000009003,ENSGALG00000001693,ENSGALG00000009289,ENSGALG00000003560,ENSGALG00000038543,ENSGALG00000037285,ENSGALG00000017216,ENSGALG00000016804,ENSGALG00000040541,ENSGALG00000032465,ENSGALG00000033638,ENSGALG00000028871,ENSGALG00000003005,ENSGALG00000027423,ENSGALG00000041932,ENSGALG…
GO:0015629	actin cytoskeleton	cellular_component	0.060141	0.98451	13	361	341	15035	ENSGALG00000015898,ENSGALG00000037929,ENSGALG00000001132,ENSGALG00000006343,ENSGALG00000053549,ENSGALG00000040136,ENSGALG00000002786,ENSGALG00000003521,ENSGALG00000012456,ENSGALG00000053601,ENSGALG00000028721,ENSGALG00000011086,ENSGALG00000011172
GO:0015698	inorganic anion transport	biological_process	0.060285	0.98605	6	361	118	15035	ENSGALG00000031997,ENSGALG00000000745,ENSGALG00000041932,ENSGALG00000027423,ENSGALG00000007959,ENSGALG00000033638
GO:0045920	negative regulation of exocytosis	biological_process	0.060457	0.98777	2	361	18	15035	ENSGALG00000042626,ENSGALG00000048923
GO:0071560	cellular response to transforming growth factor beta stimulus	biological_process	0.06049	0.98777	7	361	148	15035	ENSGALG00000009626,ENSGALG00000043555,ENSGALG00000036001,ENSGALG00000007358,ENSGALG00000014686,ENSGALG00000030607,ENSGALG00000017050
GO:2001038	regulation of cellular response to drug	biological_process	0.06055	0.98794	2	361	17	15035	ENSGALG00000033974,ENSGALG00000000607
GO:0005184	neuropeptide hormone activity	molecular_function	0.060635	0.98851	2	361	16	15035	ENSGALG00000007047,ENSGALG00000038241
GO:1900076	regulation of cellular response to insulin stimulus	biological_process	0.060772	0.98992	3	361	38	15035	ENSGALG00000027786,ENSGALG00000029836,ENSGALG00000014786
GO:1903510	mucopolysaccharide metabolic process	biological_process	0.061213	0.99629	3	361	38	15035	ENSGALG00000024056,ENSGALG00000006413,ENSGALG00000030607
GO:0005342	organic acid transmembrane transporter activity	molecular_function	0.061325	0.99729	6	361	118	15035	ENSGALG00000028871,ENSGALG00000033638,ENSGALG00000007959,ENSGALG00000041122,ENSGALG00000027423,ENSGALG00000000745
GO:0090279	regulation of calcium ion import	biological_process	0.061986	1	2	361	17	15035	ENSGALG00000000364,ENSGALG00000011104
GO:0010922	positive regulation of phosphatase activity	biological_process	0.061997	1	2	361	18	15035	ENSGALG00000011347,ENSGALG00000043555
GO:0071467	cellular response to pH	biological_process	0.062038	1	2	361	17	15035	ENSGALG00000028871,ENSGALG00000029836
GO:0050918	positive chemotaxis	biological_process	0.062259	1	3	361	38	15035	ENSGALG00000036189,ENSGALG00000029819,ENSGALG00000033974
GO:1903170	negative regulation of calcium ion transmembrane transport	biological_process	0.06239	1	2	361	17	15035	ENSGALG00000048923,ENSGALG00000032506
GO:0072337	modified amino acid transport	biological_process	0.062475	1	2	361	17	15035	ENSGALG00000040541,ENSGALG00000015055
GO:0008289	lipid binding	molecular_function	0.062482	1	17	361	477	15035	ENSGALG00000016713,ENSGALG00000027973,ENSGALG00000006453,ENSGALG00000004917,ENSGALG00000032958,ENSGALG00000010331,ENSGALG00000042626,ENSGALG00000043064,ENSGALG00000043172,ENSGALG00000032453,ENSGALG00000034150,ENSGALG00000004285,ENSGALG00000012092,ENSGALG00000002503,ENSGALG00000002121,ENSGALG00000037929,ENSGALG00000009626
GO:0035094	response to nicotine	biological_process	0.062524	1	2	361	17	15035	ENSGALG00000003005,ENSGALG00000003014
GO:0045777	positive regulation of blood pressure	biological_process	0.062525	1	2	361	17	15035	ENSGALG00000003521,ENSGALG00000038241
GO:0050922	negative regulation of chemotaxis	biological_process	0.062539	1	3	361	39	15035	ENSGALG00000009626,ENSGALG00000036189,ENSGALG00000038364
GO:0097120	receptor localization to synapse	biological_process	0.062669	1	3	361	40	15035	ENSGALG00000041225,ENSGALG00000009003,ENSGALG00000015332
GO:0032835	glomerulus development	biological_process	0.063138	1	3	361	39	15035	ENSGALG00000004593,ENSGALG00000042079,ENSGALG00000006343
GO:0002064	epithelial cell development	biological_process	0.063296	1	7	361	149	15035	ENSGALG00000010179,ENSGALG00000000364,ENSGALG00000006343,ENSGALG00000004285,ENSGALG00000006821,ENSGALG00000010036,ENSGALG00000011347
GO:0030136	clathrin-coated vesicle	cellular_component	0.063633	1	4	361	64	15035	ENSGALG00000015898,ENSGALG00000006413,ENSGALG00000043172,ENSGALG00000031343
GO:0010631	epithelial cell migration	biological_process	0.06387	1	8	361	181	15035	ENSGALG00000006992,ENSGALG00000004184,ENSGALG00000029836,ENSGALG00000000364,ENSGALG00000009626,ENSGALG00000036189,ENSGALG00000043754,ENSGALG00000038364
GO:0007417	central nervous system development	biological_process	0.063924	1	19	361	550	15035	ENSGALG00000042308,ENSGALG00000036798,ENSGALG00000015624,ENSGALG00000032320,ENSGALG00000014716,ENSGALG00000003589,ENSGALG00000000909,ENSGALG00000036142,ENSGALG00000043662,ENSGALG00000003670,ENSGALG00000000607,ENSGALG00000000653,ENSGALG00000042241,ENSGALG00000030822,ENSGALG00000004526,ENSGALG00000036497,ENSGALG00000047554,ENSGALG00000032415,ENSGALG00000015495
GO:0005215	transporter activity	molecular_function	0.063972	1	30	361	945	15035	ENSGALG00000014967,ENSGALG00000000745,ENSGALG00000003014,ENSGALG00000007959,ENSGALG00000015439,ENSGALG00000011040,ENSGALG00000041122,ENSGALG00000015332,XLOC_023902,ENSGALG00000017167,ENSGALG00000009289,ENSGALG00000003560,ENSGALG00000030545,ENSGALG00000014971,ENSGALG00000001693,ENSGALG00000009003,ENSGALG00000015055,ENSGALG00000016804,ENSGALG00000040541,ENSGALG00000032465,ENSGALG00000037285,ENSGALG…
GO:0055081	anion homeostasis	biological_process	0.063988	1	3	361	38	15035	ENSGALG00000004285,ENSGALG00000031997,ENSGALG00000043064
GO:0021516	dorsal spinal cord development	biological_process	0.064193	1	2	361	17	15035	ENSGALG00000047554,ENSGALG00000030822
GO:0001666	response to hypoxia	biological_process	0.064261	1	6	361	119	15035	ENSGALG00000018557,ENSGALG00000002121,ENSGALG00000053549,ENSGALG00000008177,ENSGALG00000054783,ENSGALG00000041640
GO:0032330	regulation of chondrocyte differentiation	biological_process	0.064324	1	3	361	39	15035	ENSGALG00000011347,ENSGALG00000043064,ENSGALG00000040276
GO:0019835	cytolysis	biological_process	0.064984	1	2	361	17	15035	ENSGALG00000029836,ENSGALG00000027973
GO:0098590	plasma membrane region	cellular_component	0.065113	1	19	361	561	15035	ENSGALG00000009003,ENSGALG00000003560,ENSGALG00000006776,ENSGALG00000040038,ENSGALG00000007305,ENSGALG00000003521,ENSGALG00000000653,ENSGALG00000011673,ENSGALG00000003014,ENSGALG00000000745,ENSGALG00000033638,ENSGALG00000016905,ENSGALG00000003005,ENSGALG00000008177,ENSGALG00000036925,ENSGALG00000041225,ENSGALG00000042308,ENSGALG00000012894,ENSGALG00000015089
GO:0051015	actin filament binding	molecular_function	0.065225	1	7	361	151	15035	ENSGALG00000003521,ENSGALG00000002786,ENSGALG00000008945,ENSGALG00000015898,ENSGALG00000040136,ENSGALG00000011902,ENSGALG00000040275
GO:0007179	transforming growth factor beta receptor signaling pathway	biological_process	0.065564	1	6	361	121	15035	ENSGALG00000043555,ENSGALG00000009626,ENSGALG00000036001,ENSGALG00000017050,ENSGALG00000014686,ENSGALG00000030607
GO:1904035	regulation of epithelial cell apoptotic process	biological_process	0.065649	1	3	361	39	15035	ENSGALG00000009626,ENSGALG00000031997,ENSGALG00000029819
GO:2000721	positive regulation of transcription from RNA polymerase II promoter involved in smooth muscle cell differentiation	biological_process	0.065686	1	1	361	3	15035	ENSGALG00000043555
GO:0048014	Tie signaling pathway	biological_process	0.066255	1	1	361	3	15035	ENSGALG00000036189
GO:0042583	chromaffin granule	cellular_component	0.066255	1	1	361	3	15035	ENSGALG00000010820
GO:0036293	response to decreased oxygen levels	biological_process	0.066272	1	6	361	120	15035	ENSGALG00000002121,ENSGALG00000018557,ENSGALG00000053549,ENSGALG00000041640,ENSGALG00000054783,ENSGALG00000008177
GO:0046928	regulation of neurotransmitter secretion	biological_process	0.066311	1	4	361	66	15035	ENSGALG00000012894,ENSGALG00000042626,ENSGALG00000002015,ENSGALG00000015332
GO:0048677	axon extension involved in regeneration	biological_process	0.066359	1	1	361	3	15035	ENSGALG00000004526
GO:0048682	sprouting of injured axon	biological_process	0.066359	1	1	361	3	15035	ENSGALG00000004526
GO:0046636	negative regulation of alpha-beta T cell activation	biological_process	0.066387	1	2	361	18	15035	ENSGALG00000036142,ENSGALG00000011347
GO:0099565	chemical synaptic transmission, postsynaptic	biological_process	0.066401	1	4	361	65	15035	ENSGALG00000000168,ENSGALG00000001716,ENSGALG00000003005,ENSGALG00000003014
GO:0001025	RNA polymerase III transcription factor binding	molecular_function	0.06648	1	1	361	3	15035	ENSGALG00000002439
GO:0001156	TFIIIC-class transcription factor binding	molecular_function	0.06648	1	1	361	3	15035	ENSGALG00000002439
GO:0051612	negative regulation of serotonin uptake	biological_process	0.066609	1	1	361	3	15035	ENSGALG00000008177
GO:0099163	synaptic signaling by nitric oxide	biological_process	0.066749	1	1	361	3	15035	ENSGALG00000008177
GO:0099543	trans-synaptic signaling by soluble gas	biological_process	0.066749	1	1	361	3	15035	ENSGALG00000008177
GO:0099548	trans-synaptic signaling by nitric oxide	biological_process	0.066749	1	1	361	3	15035	ENSGALG00000008177
GO:0001977	renal system process involved in regulation of blood volume	biological_process	0.066821	1	1	361	3	15035	ENSGALG00000000168
GO:0003093	regulation of glomerular filtration	biological_process	0.066821	1	1	361	3	15035	ENSGALG00000000168
GO:2000403	positive regulation of lymphocyte migration	biological_process	0.067018	1	2	361	18	15035	ENSGALG00000003003,ENSGALG00000053549
GO:0060168	positive regulation of adenosine receptor signaling pathway	biological_process	0.067025	1	1	361	3	15035	ENSGALG00000000653
GO:0031117	positive regulation of microtubule depolymerization	biological_process	0.067117	1	1	361	3	15035	ENSGALG00000039690
GO:0061355	Wnt protein secretion	biological_process	0.067151	1	1	361	3	15035	ENSGALG00000013616
GO:0061356	regulation of Wnt protein secretion	biological_process	0.067151	1	1	361	3	15035	ENSGALG00000013616
GO:0004924	oncostatin-M receptor activity	molecular_function	0.067238	1	1	361	3	15035	ENSGALG00000014716
GO:0038165	oncostatin-M-mediated signaling pathway	biological_process	0.067238	1	1	361	3	15035	ENSGALG00000014716
GO:0090132	epithelium migration	biological_process	0.067269	1	8	361	183	15035	ENSGALG00000000364,ENSGALG00000006992,ENSGALG00000029836,ENSGALG00000004184,ENSGALG00000043754,ENSGALG00000036189,ENSGALG00000038364,ENSGALG00000009626
GO:0048771	tissue remodeling	biological_process	0.067343	1	5	361	92	15035	ENSGALG00000053549,ENSGALG00000040045,ENSGALG00000033520,ENSGALG00000038241,ENSGALG00000011347
GO:0004517	nitric-oxide synthase activity	molecular_function	0.067463	1	1	361	3	15035	ENSGALG00000008177
GO:0070051	fibrinogen binding	molecular_function	0.0675	1	1	361	3	15035	ENSGALG00000009626
GO:1990578	perinuclear endoplasmic reticulum membrane	cellular_component	0.067547	1	1	361	3	15035	ENSGALG00000014786
GO:0042734	presynaptic membrane	cellular_component	0.067567	1	4	361	68	15035	ENSGALG00000011673,ENSGALG00000003560,ENSGALG00000036925,ENSGALG00000009003
GO:0015226	carnitine transmembrane transporter activity	molecular_function	0.067585	1	1	361	3	15035	ENSGALG00000015055
GO:1902603	carnitine transmembrane transport	biological_process	0.067585	1	1	361	3	15035	ENSGALG00000015055
GO:0050673	epithelial cell proliferation	biological_process	0.067592	1	10	361	245	15035	ENSGALG00000004593,ENSGALG00000009626,ENSGALG00000040672,ENSGALG00000038364,ENSGALG00000015253,ENSGALG00000007305,ENSGALG00000004184,ENSGALG00000033974,ENSGALG00000006821,ENSGALG00000029819
GO:0071559	response to transforming growth factor beta	biological_process	0.067691	1	7	361	152	15035	ENSGALG00000007358,ENSGALG00000014686,ENSGALG00000030607,ENSGALG00000017050,ENSGALG00000043555,ENSGALG00000009626,ENSGALG00000036001
GO:0042634	regulation of hair cycle	biological_process	0.06789	1	2	361	18	15035	ENSGALG00000007047,ENSGALG00000014908
GO:0043236	laminin binding	molecular_function	0.067928	1	2	361	18	15035	ENSGALG00000009626,ENSGALG00000042079
GO:0036474	cell death in response to hydrogen peroxide	biological_process	0.06804	1	2	361	18	15035	ENSGALG00000000607,ENSGALG00000033974
GO:2001024	negative regulation of response to drug	biological_process	0.068155	1	2	361	18	15035	ENSGALG00000033974,ENSGALG00000000607
GO:0031983	vesicle lumen	cellular_component	0.068178	1	1	361	3	15035	ENSGALG00000040045
GO:1902731	negative regulation of chondrocyte proliferation	biological_process	0.068183	1	1	361	3	15035	ENSGALG00000038364
GO:0033366	protein localization to secretory granule	biological_process	0.068194	1	1	361	3	15035	ENSGALG00000010820
GO:0071593	lymphocyte aggregation	biological_process	0.068215	1	1	361	3	15035	ENSGALG00000012456
GO:0016715	oxidoreductase activity, acting on paired donors, with incorporation or reduction of molecular oxygen, reduced ascorbate as one donor, and incorporation of one atom of oxygen	molecular_function	0.068266	1	1	361	3	15035	ENSGALG00000040045
GO:0071286	cellular response to magnesium ion	biological_process	0.068378	1	1	361	3	15035	ENSGALG00000012613
GO:0033293	monocarboxylic acid binding	molecular_function	0.068448	1	3	361	39	15035	ENSGALG00000043064,ENSGALG00000032453,ENSGALG00000004285
GO:0042420	dopamine catabolic process	biological_process	0.068487	1	1	361	3	15035	ENSGALG00000040045
GO:0099183	trans-synaptic signaling by BDNF, modulating synaptic transmission	biological_process	0.068642	1	1	361	3	15035	ENSGALG00000042626
GO:0099191	trans-synaptic signaling by BDNF	biological_process	0.068642	1	1	361	3	15035	ENSGALG00000042626
GO:0050863	regulation of T cell activation	biological_process	0.068682	1	7	361	151	15035	ENSGALG00000008306,ENSGALG00000013956,ENSGALG00000011347,ENSGALG00000014716,ENSGALG00000036142,ENSGALG00000012456,ENSGALG00000053549
GO:0004356	glutamate-ammonia ligase activity	molecular_function	0.068781	1	1	361	3	15035	ENSGALG00000043754
GO:0006542	glutamine biosynthetic process	biological_process	0.068781	1	1	361	3	15035	ENSGALG00000043754
GO:0016211	ammonia ligase activity	molecular_function	0.068781	1	1	361	3	15035	ENSGALG00000043754
GO:0034238	macrophage fusion	biological_process	0.068827	1	1	361	3	15035	ENSGALG00000033520
GO:0070110	ciliary neurotrophic factor receptor complex	cellular_component	0.068829	1	1	361	3	15035	ENSGALG00000014716
GO:0047756	chondroitin 4-sulfotransferase activity	molecular_function	0.06885	1	1	361	3	15035	ENSGALG00000030607
GO:0009893	positive regulation of metabolic process	biological_process	0.068899	1	65	361	2285	15035	ENSGALG00000040276,ENSGALG00000036346,ENSGALG00000003589,ENSGALG00000023521,ENSGALG00000003670,ENSGALG00000015150,ENSGALG00000053549,ENSGALG00000012321,ENSGALG00000006992,ENSGALG00000041640,ENSGALG00000031997,ENSGALG00000010036,ENSGALG00000002987,ENSGALG00000016296,ENSGALG00000028770,ENSGALG00000038241,ENSGALG00000006453,ENSGALG00000014716,ENSGALG00000026098,ENSGALG00000001518,ENSGALG00000008177,…
GO:0097374	sensory neuron axon guidance	biological_process	0.069013	1	1	361	3	15035	ENSGALG00000042241
GO:0051429	corticotropin-releasing hormone receptor binding	molecular_function	0.069115	1	1	361	3	15035	ENSGALG00000003163
GO:1902174	positive regulation of keratinocyte apoptotic process	biological_process	0.069232	1	1	361	3	15035	ENSGALG00000031997
GO:1903224	regulation of endodermal cell differentiation	biological_process	0.069235	1	1	361	3	15035	ENSGALG00000031112
GO:0099025	anchored component of postsynaptic membrane	cellular_component	0.069288	1	1	361	3	15035	ENSGALG00000000653
GO:0045742	positive regulation of epidermal growth factor receptor signaling pathway	biological_process	0.069313	1	2	361	18	15035	ENSGALG00000023521,ENSGALG00000006992
GO:0016859	cis-trans isomerase activity	molecular_function	0.069331	1	3	361	39	15035	ENSGALG00000011181,ENSGALG00000037669,ENSGALG00000025764
GO:0002291	T cell activation via T cell receptor contact with antigen bound to MHC molecule on antigen presenting cell	biological_process	0.069348	1	1	361	3	15035	ENSGALG00000008306
GO:0014010	Schwann cell proliferation	biological_process	0.069352	1	1	361	3	15035	ENSGALG00000000909
GO:0034673	inhibin-betaglycan-ActRII complex	cellular_component	0.069419	1	1	361	3	15035	ENSGALG00000054770
GO:0051620	norepinephrine uptake	biological_process	0.069423	1	1	361	3	15035	ENSGALG00000003560
GO:0042770	signal transduction in response to DNA damage	biological_process	0.069484	1	4	361	65	15035	ENSGALG00000015898,ENSGALG00000041640,ENSGALG00000054783,ENSGALG00000036497
GO:0003828	alpha-N-acetylneuraminate alpha-2,8-sialyltransferase activity	molecular_function	0.069491	1	1	361	3	15035	ENSGALG00000039151
GO:0062042	regulation of cardiac epithelial to mesenchymal transition	biological_process	0.069573	1	1	361	3	15035	ENSGALG00000041640
GO:0062043	positive regulation of cardiac epithelial to mesenchymal transition	biological_process	0.069573	1	1	361	3	15035	ENSGALG00000041640
GO:0072007	mesangial cell differentiation	biological_process	0.069601	1	1	361	3	15035	ENSGALG00000006343
GO:0072143	mesangial cell development	biological_process	0.069601	1	1	361	3	15035	ENSGALG00000006343
GO:0005127	ciliary neurotrophic factor receptor binding	molecular_function	0.069628	1	1	361	3	15035	ENSGALG00000014716
GO:0002034	regulation of blood vessel diameter by renin-angiotensin	biological_process	0.069632	1	1	361	3	15035	ENSGALG00000002987
GO:0003072	renal control of peripheral vascular resistance involved in regulation of systemic arterial blood pressure	biological_process	0.069632	1	1	361	3	15035	ENSGALG00000002987
GO:0070011	peptidase activity, acting on L-amino acid peptides	molecular_function	0.069674	1	18	361	512	15035	ENSGALG00000050186,ENSGALG00000013409,ENSGALG00000006992,ENSGALG00000005968,ENSGALG00000033974,ENSGALG00000005086,ENSGALG00000032974,ENSGALG00000031343,ENSGALG00000033256,ENSGALG00000001407,ENSGALG00000001115,ENSGALG00000032031,ENSGALG00000040432,ENSGALG00000004252,ENSGALG00000053549,ENSGALG00000010331,ENSGALG00000017234,ENSGALG00000005903
GO:0090713	immunological memory process	biological_process	0.0698	1	1	361	3	15035	ENSGALG00000008306
GO:0003284	septum primum development	biological_process	0.069869	1	1	361	3	15035	ENSGALG00000036497
GO:2000416	regulation of eosinophil migration	biological_process	0.069874	1	1	361	3	15035	ENSGALG00000053549
GO:0060445	branching involved in salivary gland morphogenesis	biological_process	0.069894	1	2	361	19	15035	ENSGALG00000006775,ENSGALG00000033974
GO:0000309	nicotinamide-nucleotide adenylyltransferase activity	molecular_function	0.069916	1	1	361	3	15035	ENSGALG00000004642
GO:0004515	nicotinate-nucleotide adenylyltransferase activity	molecular_function	0.069916	1	1	361	3	15035	ENSGALG00000004642
GO:0071547	piP-body	cellular_component	0.069964	1	1	361	3	15035	ENSGALG00000011565
GO:0043235	receptor complex	cellular_component	0.069974	1	11	361	285	15035	ENSGALG00000000607,ENSGALG00000039461,ENSGALG00000023521,ENSGALG00000007620,ENSGALG00000003014,ENSGALG00000041225,ENSGALG00000014716,ENSGALG00000016296,ENSGALG00000003005,ENSGALG00000013090,ENSGALG00000043555
GO:0044224	juxtaparanode region of axon	cellular_component	0.070093	1	1	361	3	15035	ENSGALG00000000653
GO:0060278	regulation of ovulation	biological_process	0.070218	1	1	361	3	15035	ENSGALG00000028770
GO:0045785	positive regulation of cell adhesion	biological_process	0.070251	1	9	361	217	15035	ENSGALG00000014716,ENSGALG00000003589,ENSGALG00000006775,ENSGALG00000042079,ENSGALG00000053549,ENSGALG00000015253,ENSGALG00000013956,ENSGALG00000043555,ENSGALG00000011347
GO:0019233	sensory perception of pain	biological_process	0.070339	1	3	361	40	15035	ENSGALG00000010331,ENSGALG00000000168,ENSGALG00000013616
GO:0046923	ER retention sequence binding	molecular_function	0.070364	1	1	361	3	15035	ENSGALG00000006413
GO:0021590	cerebellum maturation	biological_process	0.070365	1	1	361	3	15035	ENSGALG00000032320
GO:0021699	cerebellar cortex maturation	biological_process	0.070365	1	1	361	3	15035	ENSGALG00000032320
GO:0001996	positive regulation of heart rate by epinephrine-norepinephrine	biological_process	0.070385	1	1	361	3	15035	ENSGALG00000003521
GO:0072379	ER membrane insertion complex	cellular_component	0.070392	1	1	361	3	15035	ENSGALG00000014768
GO:0002190	cap-independent translational initiation	biological_process	0.070481	1	1	361	3	15035	ENSGALG00000034831
GO:0036515	serotonergic neuron axon guidance	biological_process	0.070524	1	1	361	3	15035	ENSGALG00000042308
GO:0033093	Weibel-Palade body	cellular_component	0.070576	1	1	361	3	15035	ENSGALG00000031343
GO:1902410	mitotic cytokinetic process	biological_process	0.070584	1	2	361	18	15035	XLOC_023902,ENSGALG00000006776
GO:1901873	regulation of post-translational protein modification	biological_process	0.070647	1	1	361	3	15035	ENSGALG00000004833
GO:1901874	negative regulation of post-translational protein modification	biological_process	0.070647	1	1	361	3	15035	ENSGALG00000004833
GO:0019797	procollagen-proline 3-dioxygenase activity	molecular_function	0.070655	1	1	361	3	15035	ENSGALG00000004833
GO:0044463	cell projection part	cellular_component	0.070767	1	24	361	741	15035	ENSGALG00000048923,ENSGALG00000000653,ENSGALG00000010299,ENSGALG00000016908,ENSGALG00000015332,ENSGALG00000003521,ENSGALG00000007959,ENSGALG00000007305,ENSGALG00000001693,ENSGALG00000005707,ENSGALG00000009289,ENSGALG00000039690,ENSGALG00000026903,ENSGALG00000015089,ENSGALG00000012894,ENSGALG00000042308,ENSGALG00000016804,ENSGALG00000014716,ENSGALG00000003163,ENSGALG00000000168,ENSGALG00000032958,…
GO:0120038	plasma membrane bounded cell projection part	cellular_component	0.070767	1	24	361	741	15035	ENSGALG00000006221,ENSGALG00000032958,ENSGALG00000010331,ENSGALG00000042626,ENSGALG00000015089,ENSGALG00000026903,ENSGALG00000042308,ENSGALG00000012894,ENSGALG00000016804,ENSGALG00000014716,ENSGALG00000003163,ENSGALG00000000168,ENSGALG00000001693,ENSGALG00000005707,ENSGALG00000009289,ENSGALG00000039690,ENSGALG00000048923,ENSGALG00000000653,ENSGALG00000010299,ENSGALG00000016908,ENSGALG00000015332,…
GO:0046649	lymphocyte activation	biological_process	0.070774	1	14	361	379	15035	ENSGALG00000012456,ENSGALG00000040276,ENSGALG00000014716,ENSGALG00000008306,ENSGALG00000053549,ENSGALG00000014786,ENSGALG00000010915,ENSGALG00000036497,ENSGALG00000034975,ENSGALG00000036142,ENSGALG00000003670,ENSGALG00000013956,ENSGALG00000011347,ENSGALG00000015495
GO:0005290	L-histidine transmembrane transporter activity	molecular_function	0.070788	1	1	361	3	15035	ENSGALG00000028871
GO:0071492	cellular response to UV-A	biological_process	0.070845	1	1	361	3	15035	ENSGALG00000010331
GO:0090130	tissue migration	biological_process	0.070964	1	8	361	185	15035	ENSGALG00000038364,ENSGALG00000036189,ENSGALG00000043754,ENSGALG00000009626,ENSGALG00000000364,ENSGALG00000004184,ENSGALG00000029836,ENSGALG00000006992
GO:0071711	basement membrane organization	biological_process	0.070985	1	2	361	19	15035	ENSGALG00000036798,ENSGALG00000005968
GO:0045619	regulation of lymphocyte differentiation	biological_process	0.070994	1	5	361	93	15035	ENSGALG00000053549,ENSGALG00000036142,ENSGALG00000008306,ENSGALG00000013956,ENSGALG00000011347
GO:1904714	regulation of chaperone-mediated autophagy	biological_process	0.071001	1	1	361	3	15035	ENSGALG00000000909
GO:0032010	phagolysosome	cellular_component	0.071001	1	1	361	3	15035	ENSGALG00000053549
GO:0042637	catagen	biological_process	0.071257	1	1	361	3	15035	ENSGALG00000007047
GO:0051794	regulation of timing of catagen	biological_process	0.071257	1	1	361	3	15035	ENSGALG00000007047
GO:0051795	positive regulation of timing of catagen	biological_process	0.071257	1	1	361	3	15035	ENSGALG00000007047
GO:0009410	response to xenobiotic stimulus	biological_process	0.071269	1	5	361	92	15035	ENSGALG00000009289,ENSGALG00000008178,ENSGALG00000008283,ENSGALG00000040045,ENSGALG00000004285
GO:0033128	negative regulation of histone phosphorylation	biological_process	0.071361	1	1	361	3	15035	ENSGALG00000041640
GO:0003171	atrioventricular valve development	biological_process	0.071384	1	2	361	19	15035	ENSGALG00000041640,ENSGALG00000036497
GO:0043388	positive regulation of DNA binding	biological_process	0.071389	1	3	361	41	15035	ENSGALG00000041640,ENSGALG00000007305,ENSGALG00000006992
GO:0000917	division septum assembly	biological_process	0.071557	1	1	361	3	15035	XLOC_023902
GO:0019954	asexual reproduction	biological_process	0.071557	1	1	361	3	15035	XLOC_023902
GO:0043093	FtsZ-dependent cytokinesis	biological_process	0.071557	1	1	361	3	15035	XLOC_023902
GO:0090529	cell septum assembly	biological_process	0.071557	1	1	361	3	15035	XLOC_023902
GO:0090500	endocardial cushion to mesenchymal transition	biological_process	0.07158	1	1	361	3	15035	ENSGALG00000041640
GO:0002068	glandular epithelial cell development	biological_process	0.071645	1	2	361	19	15035	ENSGALG00000010179,ENSGALG00000004285
GO:0032680	regulation of tumor necrosis factor production	biological_process	0.071708	1	4	361	66	15035	ENSGALG00000009626,ENSGALG00000006453,ENSGALG00000041640,ENSGALG00000014786
GO:1902636	kinociliary basal body	cellular_component	0.071733	1	1	361	3	15035	ENSGALG00000005707
GO:0007228	positive regulation of hh target transcription factor activity	biological_process	0.072074	1	1	361	3	15035	ENSGALG00000011347
GO:0070543	response to linoleic acid	biological_process	0.072118	1	1	361	3	15035	ENSGALG00000043064
GO:0002023	reduction of food intake in response to dietary excess	biological_process	0.072163	1	1	361	3	15035	ENSGALG00000016296
GO:1990523	bone regeneration	biological_process	0.072219	1	1	361	3	15035	ENSGALG00000038364
GO:0001942	hair follicle development	biological_process	0.072334	1	2	361	19	15035	ENSGALG00000014908,ENSGALG00000007047
GO:0022404	molting cycle process	biological_process	0.072334	1	2	361	19	15035	ENSGALG00000014908,ENSGALG00000007047
GO:0022405	hair cycle process	biological_process	0.072334	1	2	361	19	15035	ENSGALG00000007047,ENSGALG00000014908
GO:0046881	positive regulation of follicle-stimulating hormone secretion	biological_process	0.072336	1	1	361	3	15035	ENSGALG00000028770
GO:0014812	muscle cell migration	biological_process	0.072365	1	3	361	41	15035	ENSGALG00000003589,ENSGALG00000003521,ENSGALG00000038364
GO:0016647	oxidoreductase activity, acting on the CH-NH group of donors, oxygen as acceptor	molecular_function	0.072375	1	1	361	3	15035	ENSGALG00000015977
GO:0006598	polyamine catabolic process	biological_process	0.072377	1	1	361	3	15035	ENSGALG00000015977
GO:0042136	neurotransmitter biosynthetic process	biological_process	0.072378	1	3	361	41	15035	ENSGALG00000008177,ENSGALG00000016804,ENSGALG00000017216
GO:0032000	positive regulation of fatty acid beta-oxidation	biological_process	0.072433	1	1	361	3	15035	ENSGALG00000041640
GO:0033605	positive regulation of catecholamine secretion	biological_process	0.072437	1	1	361	3	15035	ENSGALG00000038241
GO:2000697	negative regulation of epithelial cell differentiation involved in kidney development	biological_process	0.072586	1	1	361	3	15035	ENSGALG00000006992
GO:0015238	drug transmembrane transporter activity	molecular_function	0.072931	1	4	361	66	15035	ENSGALG00000028871,ENSGALG00000003560,ENSGALG00000009289,ENSGALG00000041122
GO:2001014	regulation of skeletal muscle cell differentiation	biological_process	0.072967	1	2	361	19	15035	ENSGALG00000033974,ENSGALG00000041640
GO:0014060	regulation of epinephrine secretion	biological_process	0.073	1	1	361	3	15035	ENSGALG00000038241
GO:0048241	epinephrine transport	biological_process	0.073	1	1	361	3	15035	ENSGALG00000038241
GO:0048242	epinephrine secretion	biological_process	0.073	1	1	361	3	15035	ENSGALG00000038241
GO:0061737	leukotriene signaling pathway	biological_process	0.073296	1	1	361	3	15035	ENSGALG00000032348
GO:0070538	oleic acid binding	molecular_function	0.073382	1	1	361	3	15035	ENSGALG00000043064
GO:1902622	regulation of neutrophil migration	biological_process	0.073472	1	2	361	19	15035	ENSGALG00000012456,ENSGALG00000053549
GO:0002227	innate immune response in mucosa	biological_process	0.073573	1	1	361	3	15035	ENSGALG00000006453
GO:0002793	positive regulation of peptide secretion	biological_process	0.073694	1	6	361	123	15035	ENSGALG00000016785,ENSGALG00000004917,ENSGALG00000036497,ENSGALG00000041640,ENSGALG00000003560,ENSGALG00000011104
GO:0035990	tendon cell differentiation	biological_process	0.073711	1	1	361	3	15035	ENSGALG00000047554
GO:0035992	tendon formation	biological_process	0.073711	1	1	361	3	15035	ENSGALG00000047554
GO:0050794	regulation of cellular process	biological_process	0.073748	1	177	361	6838	15035	ENSGALG00000038241,ENSGALG00000006453,ENSGALG00000009488,ENSGALG00000026098,ENSGALG00000043064,ENSGALG00000040045,ENSGALG00000017050,ENSGALG00000008177,ENSGALG00000004917,ENSGALG00000028602,ENSGALG00000000653,ENSGALG00000000607,ENSGALG00000041555,ENSGALG00000011347,ENSGALG00000052981,ENSGALG00000043754,ENSGALG00000029354,ENSGALG00000003589,ENSGALG00000019312,ENSGALG00000012456,ENSGALG00000042308,…
GO:0090027	negative regulation of monocyte chemotaxis	biological_process	0.073818	1	1	361	3	15035	ENSGALG00000038364
GO:1901842	negative regulation of high voltage-gated calcium channel activity	biological_process	0.074015	1	1	361	3	15035	ENSGALG00000032506
GO:2000118	regulation of sodium-dependent phosphate transport	biological_process	0.074101	1	1	361	3	15035	ENSGALG00000031997
GO:0035905	ascending aorta development	biological_process	0.074176	1	1	361	3	15035	ENSGALG00000036497
GO:0035910	ascending aorta morphogenesis	biological_process	0.074176	1	1	361	3	15035	ENSGALG00000036497
GO:0035767	endothelial cell chemotaxis	biological_process	0.074296	1	2	361	19	15035	ENSGALG00000038364,ENSGALG00000009626
GO:1903979	negative regulation of microglial cell activation	biological_process	0.074404	1	1	361	3	15035	ENSGALG00000008660
GO:0003081	regulation of systemic arterial blood pressure by renin-angiotensin	biological_process	0.074459	1	2	361	19	15035	ENSGALG00000002987,ENSGALG00000033256
GO:0045685	regulation of glial cell differentiation	biological_process	0.074712	1	3	361	41	15035	ENSGALG00000000607,ENSGALG00000000653,ENSGALG00000014716
GO:0010633	negative regulation of epithelial cell migration	biological_process	0.074715	1	3	361	42	15035	ENSGALG00000000364,ENSGALG00000036189,ENSGALG00000009626
GO:0032277	negative regulation of gonadotropin secretion	biological_process	0.074743	1	1	361	3	15035	ENSGALG00000028770
GO:0001733	galactosylceramide sulfotransferase activity	molecular_function	0.074763	1	1	361	3	15035	ENSGALG00000006440
GO:0050694	galactose 3-O-sulfotransferase activity	molecular_function	0.074763	1	1	361	3	15035	ENSGALG00000006440
GO:0032640	tumor necrosis factor production	biological_process	0.074785	1	4	361	67	15035	ENSGALG00000009626,ENSGALG00000006453,ENSGALG00000041640,ENSGALG00000014786
GO:0008514	organic anion transmembrane transporter activity	molecular_function	0.074894	1	7	361	155	15035	ENSGALG00000007959,ENSGALG00000041122,ENSGALG00000014971,ENSGALG00000033638,ENSGALG00000028871,ENSGALG00000000745,ENSGALG00000027423
GO:0007369	gastrulation	biological_process	0.075155	1	6	361	124	15035	ENSGALG00000031112,ENSGALG00000006992,ENSGALG00000003589,ENSGALG00000015253,ENSGALG00000004285,ENSGALG00000015908
GO:0050920	regulation of chemotaxis	biological_process	0.075226	1	6	361	125	15035	ENSGALG00000016713,ENSGALG00000036189,ENSGALG00000012456,ENSGALG00000029819,ENSGALG00000038364,ENSGALG00000009626
GO:0002232	leukocyte chemotaxis involved in inflammatory response	biological_process	0.075375	1	1	361	3	15035	ENSGALG00000026098
GO:0002269	leukocyte activation involved in inflammatory response	biological_process	0.075375	1	1	361	3	15035	ENSGALG00000026098
GO:0003357	noradrenergic neuron differentiation	biological_process	0.07542	1	1	361	3	15035	ENSGALG00000036497
GO:0004938	alpha2-adrenergic receptor activity	molecular_function	0.075438	1	1	361	3	15035	ENSGALG00000023521
GO:0050769	positive regulation of neurogenesis	biological_process	0.075623	1	10	361	254	15035	ENSGALG00000010331,ENSGALG00000013616,ENSGALG00000016905,ENSGALG00000047554,ENSGALG00000042626,ENSGALG00000039690,ENSGALG00000000909,ENSGALG00000011242,ENSGALG00000042308,ENSGALG00000014716
GO:0098814	spontaneous synaptic transmission	biological_process	0.075765	1	1	361	4	15035	ENSGALG00000004917
GO:0051960	regulation of nervous system development	biological_process	0.07671	1	19	361	568	15035	ENSGALG00000000909,ENSGALG00000042626,ENSGALG00000016905,ENSGALG00000013616,ENSGALG00000010331,ENSGALG00000008177,ENSGALG00000014716,ENSGALG00000008660,ENSGALG00000009488,ENSGALG00000042308,ENSGALG00000009003,ENSGALG00000039690,ENSGALG00000047554,ENSGALG00000004526,ENSGALG00000008614,ENSGALG00000042241,ENSGALG00000000653,ENSGALG00000000607,ENSGALG00000011242
GO:0042277	peptide binding	molecular_function	0.076976	1	7	361	154	15035	ENSGALG00000006413,ENSGALG00000033256,ENSGALG00000001132,ENSGALG00000017234,ENSGALG00000013616,ENSGALG00000000607,ENSGALG00000014786
GO:0030162	regulation of proteolysis	biological_process	0.077021	1	15	361	419	15035	ENSGALG00000011214,ENSGALG00000019552,ENSGALG00000002987,ENSGALG00000009179,ENSGALG00000009626,ENSGALG00000012872,ENSGALG00000053549,ENSGALG00000008660,ENSGALG00000006992,ENSGALG00000006453,ENSGALG00000033974,ENSGALG00000029836,ENSGALG00000003589,ENSGALG00000023521,ENSGALG00000000653
GO:0009628	response to abiotic stimulus	biological_process	0.077367	1	19	361	562	15035	ENSGALG00000030822,ENSGALG00000002121,ENSGALG00000029836,ENSGALG00000041640,ENSGALG00000016699,ENSGALG00000018557,ENSGALG00000005707,ENSGALG00000041555,ENSGALG00000010915,ENSGALG00000040038,ENSGALG00000015105,ENSGALG00000054783,ENSGALG00000040275,ENSGALG00000028871,ENSGALG00000053549,ENSGALG00000014786,ENSGALG00000008177,ENSGALG00000010331,ENSGALG00000040045
GO:0050921	positive regulation of chemotaxis	biological_process	0.07739	1	4	361	68	15035	ENSGALG00000029819,ENSGALG00000012456,ENSGALG00000016713,ENSGALG00000009626
GO:0030276	clathrin binding	molecular_function	0.077424	1	3	361	43	15035	ENSGALG00000042626,ENSGALG00000006413,ENSGALG00000028602
GO:0015108	chloride transmembrane transporter activity	molecular_function	0.077512	1	4	361	69	15035	ENSGALG00000007959,ENSGALG00000033638,ENSGALG00000000745,ENSGALG00000027423
GO:0099632	protein transport within plasma membrane	biological_process	0.077833	1	2	361	20	15035	ENSGALG00000009003,ENSGALG00000015332
GO:0099637	neurotransmitter receptor transport	biological_process	0.077833	1	2	361	20	15035	ENSGALG00000009003,ENSGALG00000015332
GO:0006022	aminoglycan metabolic process	biological_process	0.077961	1	4	361	67	15035	ENSGALG00000030607,ENSGALG00000009856,ENSGALG00000006413,ENSGALG00000024056
GO:0006805	xenobiotic metabolic process	biological_process	0.078204	1	3	361	41	15035	ENSGALG00000004285,ENSGALG00000008283,ENSGALG00000008178
GO:0044877	protein-containing complex binding	molecular_function	0.078797	1	22	361	673	15035	ENSGALG00000003521,ENSGALG00000008945,ENSGALG00000007305,ENSGALG00000002786,ENSGALG00000043555,ENSGALG00000009626,ENSGALG00000002766,ENSGALG00000004833,ENSGALG00000040038,ENSGALG00000014908,ENSGALG00000038364,ENSGALG00000042079,ENSGALG00000003589,ENSGALG00000003163,ENSGALG00000004184,ENSGALG00000040275,ENSGALG00000023521,ENSGALG00000015898,ENSGALG00000011214,ENSGALG00000040136,ENSGALG00000011902,…
GO:0000187	activation of MAPK activity	biological_process	0.079093	1	4	361	69	15035	ENSGALG00000002766,ENSGALG00000009626,ENSGALG00000033974,ENSGALG00000016296
GO:0006508	proteolysis	biological_process	0.079151	1	36	361	1183	15035	ENSGALG00000004252,ENSGALG00000010331,ENSGALG00000017234,ENSGALG00000011214,ENSGALG00000001407,ENSGALG00000008660,ENSGALG00000006453,ENSGALG00000031343,ENSGALG00000011347,ENSGALG00000009626,ENSGALG00000000653,ENSGALG00000013409,ENSGALG00000029836,ENSGALG00000053549,ENSGALG00000009179,ENSGALG00000005903,ENSGALG00000023521,ENSGALG00000001115,ENSGALG00000014768,ENSGALG00000032031,ENSGALG00000040432,…
GO:0043405	regulation of MAP kinase activity	biological_process	0.079905	1	8	361	188	15035	ENSGALG00000009626,ENSGALG00000002766,ENSGALG00000016296,ENSGALG00000053549,ENSGALG00000012321,ENSGALG00000033974,ENSGALG00000038241,ENSGALG00000023521
GO:0034067	protein localization to Golgi apparatus	biological_process	0.080101	1	2	361	20	15035	ENSGALG00000011242,ENSGALG00000005707
GO:0043303	mast cell degranulation	biological_process	0.080396	1	2	361	20	15035	ENSGALG00000010820,ENSGALG00000012456
GO:2000116	regulation of cysteine-type endopeptidase activity	biological_process	0.080419	1	6	361	125	15035	ENSGALG00000033974,ENSGALG00000009626,ENSGALG00000009179,ENSGALG00000006453,ENSGALG00000008660,ENSGALG00000006992
GO:2000404	regulation of T cell migration	biological_process	0.080447	1	2	361	20	15035	ENSGALG00000053549,ENSGALG00000003003
GO:0045765	regulation of angiogenesis	biological_process	0.080509	1	7	361	158	15035	ENSGALG00000009626,ENSGALG00000004184,ENSGALG00000016945,ENSGALG00000011200,ENSGALG00000006821,ENSGALG00000036189,ENSGALG00000043754
GO:0003309	type B pancreatic cell differentiation	biological_process	0.08057	1	2	361	20	15035	ENSGALG00000004285,ENSGALG00000010179
GO:0033267	axon part	cellular_component	0.080635	1	7	361	158	15035	ENSGALG00000015332,ENSGALG00000001693,ENSGALG00000039690,ENSGALG00000009289,ENSGALG00000048923,ENSGALG00000016908,ENSGALG00000000653
GO:0005112	Notch binding	molecular_function	0.080659	1	2	361	20	15035	ENSGALG00000010386,ENSGALG00000038364
GO:0060627	regulation of vesicle-mediated transport	biological_process	0.081112	1	11	361	290	15035	ENSGALG00000042626,ENSGALG00000004917,ENSGALG00000002503,ENSGALG00000003589,ENSGALG00000015332,ENSGALG00000031997,ENSGALG00000012894,ENSGALG00000016480,ENSGALG00000048923,ENSGALG00000012456,ENSGALG00000014726
GO:0014046	dopamine secretion	biological_process	0.08143	1	2	361	20	15035	ENSGALG00000002015,ENSGALG00000042626
GO:0014059	regulation of dopamine secretion	biological_process	0.08143	1	2	361	20	15035	ENSGALG00000002015,ENSGALG00000042626
GO:0071205	protein localization to juxtaparanode region of axon	biological_process	0.081976	1	1	361	4	15035	ENSGALG00000000653
GO:0009897	external side of plasma membrane	cellular_component	0.082047	1	8	361	188	15035	ENSGALG00000009626,ENSGALG00000016296,ENSGALG00000016785,ENSGALG00000031343,ENSGALG00000014716,ENSGALG00000051054,ENSGALG00000016480,ENSGALG00000007620
GO:0098772	molecular function regulator	molecular_function	0.082087	1	35	361	1148	15035	ENSGALG00000014786,ENSGALG00000032506,ENSGALG00000011214,ENSGALG00000026098,ENSGALG00000029819,ENSGALG00000003003,ENSGALG00000008660,ENSGALG00000038241,ENSGALG00000006453,ENSGALG00000029354,ENSGALG00000015028,ENSGALG00000014908,ENSGALG00000047554,ENSGALG00000049551,ENSGALG00000000364,ENSGALG00000006552,XLOC_033031,ENSGALG00000009179,ENSGALG00000002893,ENSGALG00000003034,ENSGALG00000012456,ENSGALG…
GO:0090100	positive regulation of transmembrane receptor protein serine/threonine kinase signaling pathway	biological_process	0.08222	1	4	361	69	15035	ENSGALG00000043555,ENSGALG00000009626,ENSGALG00000047554,ENSGALG00000028770
GO:1901186	positive regulation of ERBB signaling pathway	biological_process	0.082529	1	2	361	20	15035	ENSGALG00000023521,ENSGALG00000006992
GO:0090596	sensory organ morphogenesis	biological_process	0.082768	1	8	361	189	15035	ENSGALG00000041640,ENSGALG00000014686,ENSGALG00000042308,ENSGALG00000015150,ENSGALG00000015253,ENSGALG00000003670,ENSGALG00000031112,ENSGALG00000011347
GO:0099003	vesicle-mediated transport in synapse	biological_process	0.082868	1	6	361	130	15035	ENSGALG00000012894,ENSGALG00000004917,ENSGALG00000011673,ENSGALG00000042626,ENSGALG00000009003,ENSGALG00000015332
GO:0015103	inorganic anion transmembrane transporter activity	molecular_function	0.083071	1	5	361	99	15035	ENSGALG00000000745,ENSGALG00000041932,ENSGALG00000027423,ENSGALG00000007959,ENSGALG00000033638
GO:0045745	positive regulation of G-protein coupled receptor protein signaling pathway	biological_process	0.083079	1	2	361	20	15035	ENSGALG00000008177,ENSGALG00000000653
GO:0005178	integrin binding	molecular_function	0.083873	1	4	361	71	15035	ENSGALG00000003589,ENSGALG00000009626,ENSGALG00000043555,ENSGALG00000038364
GO:2000027	regulation of organ morphogenesis	biological_process	0.083889	1	6	361	127	15035	ENSGALG00000042308,ENSGALG00000041640,ENSGALG00000004593,ENSGALG00000040276,ENSGALG00000011347,ENSGALG00000033974
GO:0005865	striated muscle thin filament	cellular_component	0.083906	1	2	361	20	15035	ENSGALG00000028721,ENSGALG00000011086
GO:1900271	regulation of long-term synaptic potentiation	biological_process	0.0842	1	2	361	21	15035	ENSGALG00000026903,ENSGALG00000010331
GO:0007423	sensory organ development	biological_process	0.084245	1	14	361	391	15035	ENSGALG00000031112,ENSGALG00000003670,ENSGALG00000011347,ENSGALG00000005707,ENSGALG00000012121,ENSGALG00000045052,ENSGALG00000015150,ENSGALG00000015253,ENSGALG00000031343,ENSGALG00000006552,ENSGALG00000036798,ENSGALG00000041640,ENSGALG00000014686,ENSGALG00000042308
GO:0035588	G-protein coupled purinergic receptor signaling pathway	biological_process	0.084315	1	2	361	20	15035	ENSGALG00000000168,ENSGALG00000000653
GO:0034765	regulation of ion transmembrane transport	biological_process	0.084331	1	10	361	258	15035	ENSGALG00000032506,ENSGALG00000006413,ENSGALG00000009626,ENSGALG00000005502,ENSGALG00000006992,ENSGALG00000011040,ENSGALG00000038543,ENSGALG00000041640,ENSGALG00000048923,ENSGALG00000007047
GO:0030902	hindbrain development	biological_process	0.08499	1	5	361	98	15035	ENSGALG00000032415,ENSGALG00000003670,ENSGALG00000042241,ENSGALG00000032320,ENSGALG00000000607
GO:0045879	negative regulation of smoothened signaling pathway	biological_process	0.085503	1	2	361	21	15035	ENSGALG00000000607,ENSGALG00000040276
GO:0090263	positive regulation of canonical Wnt signaling pathway	biological_process	0.085797	1	4	361	71	15035	ENSGALG00000031997,ENSGALG00000036497,ENSGALG00000041555,ENSGALG00000004593
GO:0044433	cytoplasmic vesicle part	cellular_component	0.085977	1	13	361	360	15035	ENSGALG00000014967,ENSGALG00000054783,ENSGALG00000028602,ENSGALG00000041122,ENSGALG00000004184,ENSGALG00000053549,ENSGALG00000040045,ENSGALG00000014997,ENSGALG00000033520,ENSGALG00000042626,ENSGALG00000009289,ENSGALG00000001693,ENSGALG00000006413
GO:0070509	calcium ion import	biological_process	0.085994	1	3	361	44	15035	ENSGALG00000011104,ENSGALG00000038405,ENSGALG00000000364
GO:0019882	antigen processing and presentation	biological_process	0.086008	1	3	361	43	15035	ENSGALG00000014726,ENSGALG00000008306,ENSGALG00000009626
GO:0098656	anion transmembrane transport	biological_process	0.086259	1	8	361	193	15035	ENSGALG00000027423,ENSGALG00000028871,ENSGALG00000009626,ENSGALG00000033638,ENSGALG00000000745,ENSGALG00000040541,ENSGALG00000007959,ENSGALG00000041122
GO:0022612	gland morphogenesis	biological_process	0.086328	1	4	361	71	15035	ENSGALG00000004593,ENSGALG00000047554,ENSGALG00000033974,ENSGALG00000006775
GO:0043370	regulation of CD4-positive, alpha-beta T cell differentiation	biological_process	0.086885	1	2	361	21	15035	ENSGALG00000036142,ENSGALG00000013956
GO:0002448	mast cell mediated immunity	biological_process	0.087223	1	2	361	21	15035	ENSGALG00000012456,ENSGALG00000010820
GO:0002279	mast cell activation involved in immune response	biological_process	0.087236	1	2	361	21	15035	ENSGALG00000010820,ENSGALG00000012456
GO:0043537	negative regulation of blood vessel endothelial cell migration	biological_process	0.087401	1	2	361	21	15035	ENSGALG00000036189,ENSGALG00000009626
GO:0001228	transcriptional activator activity, RNA polymerase II transcription regulatory region sequence-specific DNA binding	molecular_function	0.08742	1	11	361	287	15035	ENSGALG00000015150,ENSGALG00000036497,ENSGALG00000003670,ENSGALG00000001518,ENSGALG00000003106,ENSGALG00000015495,ENSGALG00000004285,ENSGALG00000010036,ENSGALG00000042241,ENSGALG00000040276,ENSGALG00000001191
GO:0010035	response to inorganic substance	biological_process	0.087607	1	9	361	224	15035	ENSGALG00000006992,ENSGALG00000033974,ENSGALG00000029836,ENSGALG00000000607,ENSGALG00000012613,ENSGALG00000018557,ENSGALG00000042626,ENSGALG00000009626,ENSGALG00000038405
GO:0002051	osteoblast fate commitment	biological_process	0.087653	1	1	361	4	15035	ENSGALG00000040276
GO:0061138	morphogenesis of a branching epithelium	biological_process	0.087766	1	6	361	129	15035	ENSGALG00000006775,ENSGALG00000047554,ENSGALG00000036798,ENSGALG00000043555,ENSGALG00000033974,ENSGALG00000011347
GO:0003413	chondrocyte differentiation involved in endochondral bone morphogenesis	biological_process	0.087802	1	2	361	21	15035	ENSGALG00000011347,ENSGALG00000011214
GO:2000074	regulation of type B pancreatic cell development	biological_process	0.087892	1	1	361	4	15035	ENSGALG00000010179
GO:0008420	CTD phosphatase activity	molecular_function	0.087991	1	1	361	4	15035	ENSGALG00000001489
GO:0008502	melatonin receptor activity	molecular_function	0.087997	1	1	361	4	15035	ENSGALG00000015150
GO:1901983	regulation of protein acetylation	biological_process	0.088012	1	3	361	45	15035	ENSGALG00000041640,ENSGALG00000036497,ENSGALG00000008177
GO:0007411	axon guidance	biological_process	0.088079	1	7	361	164	15035	ENSGALG00000030822,ENSGALG00000047554,ENSGALG00000042241,ENSGALG00000042308,ENSGALG00000012456,ENSGALG00000000653,ENSGALG00000007620
GO:0031821	G-protein coupled serotonin receptor binding	molecular_function	0.088142	1	1	361	4	15035	ENSGALG00000003163
GO:0051611	regulation of serotonin uptake	biological_process	0.088208	1	1	361	4	15035	ENSGALG00000008177
GO:0071398	cellular response to fatty acid	biological_process	0.088225	1	2	361	21	15035	ENSGALG00000012396,ENSGALG00000043064
GO:0071230	cellular response to amino acid stimulus	biological_process	0.088341	1	3	361	45	15035	ENSGALG00000041555,ENSGALG00000031112,ENSGALG00000036798
GO:0032059	bleb	cellular_component	0.088512	1	1	361	4	15035	ENSGALG00000003521
GO:0060665	regulation of branching involved in salivary gland morphogenesis by mesenchymal-epithelial signaling	biological_process	0.088532	1	1	361	4	15035	ENSGALG00000033974
GO:0003958	NADPH-hemoprotein reductase activity	molecular_function	0.088534	1	1	361	4	15035	ENSGALG00000008177
GO:0071474	cellular hyperosmotic response	biological_process	0.088733	1	1	361	4	15035	ENSGALG00000040275
GO:0048596	embryonic camera-type eye morphogenesis	biological_process	0.088768	1	2	361	21	15035	ENSGALG00000041640,ENSGALG00000011347
GO:0035296	regulation of tube diameter	biological_process	0.088832	1	4	361	70	15035	ENSGALG00000008177,ENSGALG00000040045,ENSGALG00000006343,ENSGALG00000002987
GO:0097746	regulation of blood vessel diameter	biological_process	0.088832	1	4	361	70	15035	ENSGALG00000002987,ENSGALG00000008177,ENSGALG00000006343,ENSGALG00000040045
GO:0048640	negative regulation of developmental growth	biological_process	0.088859	1	4	361	72	15035	ENSGALG00000004526,ENSGALG00000002893,ENSGALG00000007047,ENSGALG00000011347
GO:0031133	regulation of axon diameter	biological_process	0.08895	1	1	361	4	15035	ENSGALG00000000653
GO:1903522	regulation of blood circulation	biological_process	0.088963	1	6	361	131	15035	ENSGALG00000003163,ENSGALG00000003521,ENSGALG00000040045,ENSGALG00000000364,ENSGALG00000012894,ENSGALG00000008177
GO:0042451	purine nucleoside biosynthetic process	biological_process	0.088988	1	2	361	21	15035	ENSGALG00000007305,ENSGALG00000015833
GO:0046129	purine ribonucleoside biosynthetic process	biological_process	0.088988	1	2	361	21	15035	ENSGALG00000015833,ENSGALG00000007305
GO:0004857	enzyme inhibitor activity	molecular_function	0.089087	1	9	361	222	15035	ENSGALG00000009725,ENSGALG00000026137,ENSGALG00000006453,XLOC_033031,ENSGALG00000008660,ENSGALG00000012872,ENSGALG00000011214,ENSGALG00000002987,ENSGALG00000019552
GO:0060167	regulation of adenosine receptor signaling pathway	biological_process	0.089116	1	1	361	4	15035	ENSGALG00000000653
GO:0106070	regulation of adenylate cyclase-activating G-protein coupled receptor signaling pathway	biological_process	0.089262	1	1	361	4	15035	ENSGALG00000008177
GO:0035583	sequestering of TGFbeta in extracellular matrix	biological_process	0.089344	1	1	361	4	15035	ENSGALG00000014686
GO:0016880	acid-ammonia (or amide) ligase activity	molecular_function	0.089397	1	1	361	4	15035	ENSGALG00000043754
GO:0051581	negative regulation of neurotransmitter uptake	biological_process	0.089405	1	1	361	4	15035	ENSGALG00000008177
GO:0071695	anatomical structure maturation	biological_process	0.089445	1	5	361	100	15035	ENSGALG00000034831,ENSGALG00000032320,ENSGALG00000007047,ENSGALG00000000653,ENSGALG00000010179
GO:0016413	O-acetyltransferase activity	molecular_function	0.089498	1	1	361	4	15035	ENSGALG00000002289
GO:0009268	response to pH	biological_process	0.089619	1	2	361	21	15035	ENSGALG00000029836,ENSGALG00000028871
GO:0045992	negative regulation of embryonic development	biological_process	0.089619	1	2	361	21	15035	ENSGALG00000031112,ENSGALG00000042308
GO:0071971	extracellular exosome assembly	biological_process	0.089631	1	1	361	4	15035	ENSGALG00000016480
GO:1903551	regulation of extracellular exosome assembly	biological_process	0.089631	1	1	361	4	15035	ENSGALG00000016480
GO:0015838	amino-acid betaine transport	biological_process	0.08966	1	1	361	4	15035	ENSGALG00000015055
GO:0015879	carnitine transport	biological_process	0.08966	1	1	361	4	15035	ENSGALG00000015055
GO:1904753	negative regulation of vascular associated smooth muscle cell migration	biological_process	0.089803	1	1	361	4	15035	ENSGALG00000003521
GO:0005176	ErbB-2 class receptor binding	molecular_function	0.089904	1	1	361	4	15035	ENSGALG00000051882
GO:0070482	response to oxygen levels	biological_process	0.089924	1	6	361	130	15035	ENSGALG00000018557,ENSGALG00000002121,ENSGALG00000054783,ENSGALG00000008177,ENSGALG00000041640,ENSGALG00000053549
GO:0032762	mast cell cytokine production	biological_process	0.089941	1	1	361	4	15035	ENSGALG00000010820
GO:1902804	negative regulation of synaptic vesicle transport	biological_process	0.089947	1	1	361	4	15035	ENSGALG00000042626
GO:2000301	negative regulation of synaptic vesicle exocytosis	biological_process	0.089947	1	1	361	4	15035	ENSGALG00000042626
GO:0004897	ciliary neurotrophic factor receptor activity	molecular_function	0.09	1	1	361	4	15035	ENSGALG00000014716
GO:0014858	positive regulation of skeletal muscle cell proliferation	biological_process	0.090054	1	1	361	4	15035	ENSGALG00000033974
GO:0014049	positive regulation of glutamate secretion	biological_process	0.090225	1	1	361	4	15035	ENSGALG00000042626
GO:0097485	neuron projection guidance	biological_process	0.09031	1	7	361	165	15035	ENSGALG00000000653,ENSGALG00000007620,ENSGALG00000012456,ENSGALG00000042308,ENSGALG00000042241,ENSGALG00000047554,ENSGALG00000030822
GO:0071229	cellular response to acid chemical	biological_process	0.090326	1	5	361	101	15035	ENSGALG00000041555,ENSGALG00000036798,ENSGALG00000012396,ENSGALG00000031112,ENSGALG00000043064
GO:1990247	N6-methyladenosine-containing RNA binding	molecular_function	0.090414	1	1	361	4	15035	ENSGALG00000034831
GO:2000389	regulation of neutrophil extravasation	biological_process	0.090443	1	1	361	4	15035	ENSGALG00000053549
GO:2000391	positive regulation of neutrophil extravasation	biological_process	0.090443	1	1	361	4	15035	ENSGALG00000053549
GO:2000767	positive regulation of cytoplasmic translation	biological_process	0.090465	1	1	361	4	15035	ENSGALG00000034831
GO:0010754	negative regulation of cGMP-mediated signaling	biological_process	0.090521	1	1	361	4	15035	ENSGALG00000009626
GO:0015874	norepinephrine transport	biological_process	0.090589	1	1	361	4	15035	ENSGALG00000003560
GO:0018076	N-terminal peptidyl-lysine acetylation	biological_process	0.090712	1	1	361	4	15035	ENSGALG00000036497
GO:0015373	anion:sodium symporter activity	molecular_function	0.090728	1	1	361	4	15035	ENSGALG00000041932
GO:2000793	cell proliferation involved in heart valve development	biological_process	0.09073	1	1	361	4	15035	ENSGALG00000041640
GO:0036379	myofilament	cellular_component	0.090824	1	2	361	21	15035	ENSGALG00000028721,ENSGALG00000011086
GO:0060252	positive regulation of glial cell proliferation	biological_process	0.090947	1	1	361	4	15035	ENSGALG00000000909
GO:0032097	positive regulation of response to food	biological_process	0.091	1	1	361	4	15035	ENSGALG00000013616
GO:0032100	positive regulation of appetite	biological_process	0.091	1	1	361	4	15035	ENSGALG00000013616
GO:0032106	positive regulation of response to extracellular stimulus	biological_process	0.091	1	1	361	4	15035	ENSGALG00000013616
GO:0032109	positive regulation of response to nutrient levels	biological_process	0.091	1	1	361	4	15035	ENSGALG00000013616
GO:0046530	photoreceptor cell differentiation	biological_process	0.091081	1	3	361	45	15035	ENSGALG00000011347,ENSGALG00000005707,ENSGALG00000015150
GO:0001757	somite specification	biological_process	0.091116	1	1	361	4	15035	ENSGALG00000001191
GO:0008215	spermine metabolic process	biological_process	0.091118	1	1	361	4	15035	ENSGALG00000015977
GO:0060287	epithelial cilium movement involved in determination of left/right asymmetry	biological_process	0.091128	1	1	361	4	15035	ENSGALG00000010179
GO:0047499	calcium-independent phospholipase A2 activity	molecular_function	0.091272	1	1	361	4	15035	ENSGALG00000016713
GO:1903349	omegasome membrane	cellular_component	0.091364	1	1	361	4	15035	ENSGALG00000026492
GO:1990462	omegasome	cellular_component	0.091364	1	1	361	4	15035	ENSGALG00000026492
GO:0002069	columnar/cuboidal epithelial cell maturation	biological_process	0.091481	1	1	361	4	15035	ENSGALG00000010179
GO:0035358	regulation of peroxisome proliferator activated receptor signaling pathway	biological_process	0.091494	1	1	361	4	15035	ENSGALG00000041640
GO:1900019	regulation of protein kinase C activity	biological_process	0.091551	1	1	361	4	15035	ENSGALG00000006413
GO:1900020	positive regulation of protein kinase C activity	biological_process	0.091551	1	1	361	4	15035	ENSGALG00000006413
GO:0035948	positive regulation of gluconeogenesis by positive regulation of transcription from RNA polymerase II promoter	biological_process	0.091583	1	1	361	4	15035	ENSGALG00000011104
GO:0036514	dopaminergic neuron axon guidance	biological_process	0.091663	1	1	361	4	15035	ENSGALG00000042308
GO:1904938	planar cell polarity pathway involved in axon guidance	biological_process	0.091663	1	1	361	4	15035	ENSGALG00000042308
GO:0061817	endoplasmic reticulum-plasma membrane tethering	biological_process	0.091708	1	1	361	4	15035	ENSGALG00000012092
GO:0042742	defense response to bacterium	biological_process	0.091732	1	5	361	98	15035	ENSGALG00000026098,ENSGALG00000027973,ENSGALG00000006453,ENSGALG00000034150,ENSGALG00000010820
GO:1902947	regulation of tau-protein kinase activity	biological_process	0.091802	1	1	361	4	15035	ENSGALG00000033974
GO:0046415	urate metabolic process	biological_process	0.091866	1	1	361	4	15035	ENSGALG00000014971
GO:0051385	response to mineralocorticoid	biological_process	0.091998	1	1	361	4	15035	ENSGALG00000043064
GO:0051412	response to corticosterone	biological_process	0.091998	1	1	361	4	15035	ENSGALG00000043064
GO:0010815	bradykinin catabolic process	biological_process	0.092038	1	1	361	4	15035	ENSGALG00000031343
GO:0005031	tumor necrosis factor-activated receptor activity	molecular_function	0.09204	1	1	361	4	15035	ENSGALG00000039461
GO:0022890	inorganic cation transmembrane transporter activity	molecular_function	0.092064	1	16	361	469	15035	ENSGALG00000001693,ENSGALG00000009003,ENSGALG00000009289,ENSGALG00000003560,XLOC_023902,ENSGALG00000011040,ENSGALG00000003014,ENSGALG00000003005,ENSGALG00000005502,ENSGALG00000041932,ENSGALG00000038543,ENSGALG00000017216,ENSGALG00000037285,ENSGALG00000040541,ENSGALG00000032465,ENSGALG00000016804
GO:1901841	regulation of high voltage-gated calcium channel activity	biological_process	0.092085	1	1	361	4	15035	ENSGALG00000032506
GO:0003406	retinal pigment epithelium development	biological_process	0.092098	1	1	361	4	15035	ENSGALG00000011347
GO:0036446	myofibroblast differentiation	biological_process	0.092225	1	1	361	4	15035	ENSGALG00000026098
GO:1903588	negative regulation of blood vessel endothelial cell proliferation involved in sprouting angiogenesis	biological_process	0.092242	1	1	361	4	15035	ENSGALG00000009626
GO:1901299	negative regulation of hydrogen peroxide-mediated programmed cell death	biological_process	0.092317	1	1	361	4	15035	ENSGALG00000033974
GO:0006868	glutamine transport	biological_process	0.09238	1	1	361	4	15035	ENSGALG00000028871
GO:0015186	L-glutamine transmembrane transporter activity	molecular_function	0.09238	1	1	361	4	15035	ENSGALG00000028871
GO:2000317	negative regulation of T-helper 17 type immune response	biological_process	0.092402	1	1	361	4	15035	ENSGALG00000036142
GO:2000320	negative regulation of T-helper 17 cell differentiation	biological_process	0.092402	1	1	361	4	15035	ENSGALG00000036142
GO:0042711	maternal behavior	biological_process	0.092422	1	1	361	4	15035	ENSGALG00000040045
GO:0019614	catechol-containing compound catabolic process	biological_process	0.092524	1	1	361	4	15035	ENSGALG00000040045
GO:0042424	catecholamine catabolic process	biological_process	0.092524	1	1	361	4	15035	ENSGALG00000040045
GO:0070820	tertiary granule	cellular_component	0.092586	1	1	361	4	15035	ENSGALG00000053549
GO:0035608	protein deglutamylation	biological_process	0.092669	1	1	361	4	15035	ENSGALG00000017234
GO:0060091	kinocilium	cellular_component	0.092834	1	1	361	4	15035	ENSGALG00000005707
GO:0097732	9+2 non-motile cilium	cellular_component	0.092834	1	1	361	4	15035	ENSGALG00000005707
GO:0032505	reproduction of a single-celled organism	biological_process	0.09287	1	1	361	4	15035	XLOC_023902
GO:0031099	regeneration	biological_process	0.092888	1	4	361	73	15035	ENSGALG00000004593,ENSGALG00000000909,ENSGALG00000004526,ENSGALG00000038364
GO:0061304	retinal blood vessel morphogenesis	biological_process	0.092957	1	1	361	4	15035	ENSGALG00000036798
GO:1904238	pericyte cell differentiation	biological_process	0.093062	1	1	361	4	15035	ENSGALG00000006343
GO:0006820	anion transport	biological_process	0.09312	1	14	361	399	15035	ENSGALG00000000364,ENSGALG00000000745,ENSGALG00000040541,ENSGALG00000031997,ENSGALG00000007959,ENSGALG00000041122,ENSGALG00000027423,ENSGALG00000041932,ENSGALG00000009626,ENSGALG00000028871,ENSGALG00000014971,ENSGALG00000033638,ENSGALG00000043064,ENSGALG00000042626
GO:2000583	regulation of platelet-derived growth factor receptor-alpha signaling pathway	biological_process	0.093122	1	1	361	4	15035	ENSGALG00000005707
GO:0009794	regulation of mitotic cell cycle, embryonic	biological_process	0.093184	1	1	361	4	15035	ENSGALG00000042308
GO:0045448	mitotic cell cycle, embryonic	biological_process	0.093184	1	1	361	4	15035	ENSGALG00000042308
GO:0007227	signal transduction downstream of smoothened	biological_process	0.093216	1	1	361	4	15035	ENSGALG00000011347
GO:0042421	norepinephrine biosynthetic process	biological_process	0.093227	1	1	361	4	15035	ENSGALG00000040045
GO:0097283	keratinocyte apoptotic process	biological_process	0.093244	1	1	361	4	15035	ENSGALG00000031997
GO:1902172	regulation of keratinocyte apoptotic process	biological_process	0.093244	1	1	361	4	15035	ENSGALG00000031997
GO:0002694	regulation of leukocyte activation	biological_process	0.09333	1	10	361	261	15035	ENSGALG00000036142,ENSGALG00000011347,ENSGALG00000013956,ENSGALG00000009626,ENSGALG00000053549,ENSGALG00000016785,ENSGALG00000008660,ENSGALG00000014716,ENSGALG00000008306,ENSGALG00000012456
GO:0031667	response to nutrient levels	biological_process	0.093471	1	8	361	195	15035	ENSGALG00000013616,ENSGALG00000028871,ENSGALG00000016296,ENSGALG00000043754,ENSGALG00000028770,ENSGALG00000023542,ENSGALG00000038241,ENSGALG00000011104
GO:0048818	positive regulation of hair follicle maturation	biological_process	0.093482	1	1	361	4	15035	ENSGALG00000007047
GO:0021603	cranial nerve formation	biological_process	0.09363	1	1	361	4	15035	ENSGALG00000003670
GO:0089709	L-histidine transmembrane transport	biological_process	0.093661	1	1	361	4	15035	ENSGALG00000028871
GO:0045921	positive regulation of exocytosis	biological_process	0.093677	1	3	361	46	15035	ENSGALG00000042626,ENSGALG00000016480,ENSGALG00000004917
GO:0031544	peptidyl-proline 3-dioxygenase activity	molecular_function	0.09373	1	1	361	4	15035	ENSGALG00000004833
GO:0032962	positive regulation of inositol trisphosphate biosynthetic process	biological_process	0.093753	1	1	361	4	15035	ENSGALG00000015495
GO:0098773	skin epidermis development	biological_process	0.093836	1	2	361	22	15035	ENSGALG00000014908,ENSGALG00000007047
GO:0043154	negative regulation of cysteine-type endopeptidase activity involved in apoptotic process	biological_process	0.093845	1	3	361	45	15035	ENSGALG00000033974,ENSGALG00000009626,ENSGALG00000006992
GO:0017015	regulation of transforming growth factor beta receptor signaling pathway	biological_process	0.093934	1	4	361	73	15035	ENSGALG00000043555,ENSGALG00000009626,ENSGALG00000030607,ENSGALG00000014686
GO:0071855	neuropeptide receptor binding	molecular_function	0.093949	1	2	361	21	15035	ENSGALG00000003163,ENSGALG00000007047
GO:0003015	heart process	biological_process	0.093994	1	6	361	134	15035	ENSGALG00000000364,ENSGALG00000010820,ENSGALG00000012894,ENSGALG00000008177,ENSGALG00000003163,ENSGALG00000003521
GO:0004957	prostaglandin E receptor activity	molecular_function	0.094108	1	1	361	4	15035	ENSGALG00000012396
GO:0001654	eye development	biological_process	0.094117	1	10	361	262	15035	ENSGALG00000031112,ENSGALG00000012121,ENSGALG00000011347,ENSGALG00000045052,ENSGALG00000015150,ENSGALG00000015253,ENSGALG00000006552,ENSGALG00000036798,ENSGALG00000041640,ENSGALG00000014686
GO:0032890	regulation of organic acid transport	biological_process	0.094511	1	2	361	22	15035	ENSGALG00000042626,ENSGALG00000009626
GO:0035989	tendon development	biological_process	0.094564	1	1	361	4	15035	ENSGALG00000047554
GO:0021680	cerebellar Purkinje cell layer development	biological_process	0.094578	1	2	361	22	15035	ENSGALG00000032415,ENSGALG00000032320
GO:0016705	oxidoreductase activity, acting on paired donors, with incorporation or reduction of molecular oxygen	molecular_function	0.094648	1	6	361	130	15035	ENSGALG00000008177,ENSGALG00000008283,ENSGALG00000008178,ENSGALG00000039742,ENSGALG00000040045,ENSGALG00000004833
GO:0098661	inorganic anion transmembrane transport	biological_process	0.094723	1	4	361	74	15035	ENSGALG00000007959,ENSGALG00000033638,ENSGALG00000000745,ENSGALG00000027423
GO:0045582	positive regulation of T cell differentiation	biological_process	0.094763	1	3	361	46	15035	ENSGALG00000053549,ENSGALG00000011347,ENSGALG00000013956
GO:0061182	negative regulation of chondrocyte development	biological_process	0.09479	1	1	361	4	15035	ENSGALG00000011347
GO:0033087	negative regulation of immature T cell proliferation	biological_process	0.09482	1	1	361	4	15035	ENSGALG00000011347
GO:0033088	negative regulation of immature T cell proliferation in thymus	biological_process	0.09482	1	1	361	4	15035	ENSGALG00000011347
GO:0015711	organic anion transport	biological_process	0.095139	1	11	361	296	15035	ENSGALG00000000745,ENSGALG00000040541,ENSGALG00000007959,ENSGALG00000041122,ENSGALG00000027423,ENSGALG00000042626,ENSGALG00000043064,ENSGALG00000009626,ENSGALG00000033638,ENSGALG00000014971,ENSGALG00000028871
GO:2001268	negative regulation of cysteine-type endopeptidase activity involved in apoptotic signaling pathway	biological_process	0.095146	1	1	361	4	15035	ENSGALG00000006992
GO:0051222	positive regulation of protein transport	biological_process	0.095179	1	8	361	195	15035	ENSGALG00000011104,ENSGALG00000041640,ENSGALG00000030545,ENSGALG00000006413,ENSGALG00000004917,ENSGALG00000036497,ENSGALG00000014786,ENSGALG00000016785
GO:0043086	negative regulation of catalytic activity	biological_process	0.095228	1	15	361	431	15035	ENSGALG00000026137,ENSGALG00000009725,ENSGALG00000003589,ENSGALG00000033974,ENSGALG00000006453,ENSGALG00000006992,ENSGALG00000008660,ENSGALG00000008177,ENSGALG00000029354,ENSGALG00000009349,ENSGALG00000012872,ENSGALG00000009626,ENSGALG00000011214,ENSGALG00000019552,ENSGALG00000002987
GO:0043368	positive T cell selection	biological_process	0.095234	1	2	361	22	15035	ENSGALG00000036142,ENSGALG00000010915
GO:2000275	regulation of oxidative phosphorylation uncoupler activity	biological_process	0.095257	1	1	361	4	15035	ENSGALG00000041640
GO:1903332	regulation of protein folding	biological_process	0.095432	1	1	361	4	15035	ENSGALG00000014768
GO:1903644	regulation of chaperone-mediated protein folding	biological_process	0.095432	1	1	361	4	15035	ENSGALG00000014768
GO:0043010	camera-type eye development	biological_process	0.095459	1	9	361	229	15035	ENSGALG00000012121,ENSGALG00000011347,ENSGALG00000045052,ENSGALG00000015150,ENSGALG00000015253,ENSGALG00000006552,ENSGALG00000036798,ENSGALG00000041640,ENSGALG00000014686
GO:0050994	regulation of lipid catabolic process	biological_process	0.096019	1	2	361	22	15035	ENSGALG00000023521,ENSGALG00000041640
GO:0051464	positive regulation of cortisol secretion	biological_process	0.09604	1	1	361	4	15035	ENSGALG00000007047
GO:2000848	positive regulation of corticosteroid hormone secretion	biological_process	0.09604	1	1	361	4	15035	ENSGALG00000007047
GO:2000851	positive regulation of glucocorticoid secretion	biological_process	0.09604	1	1	361	4	15035	ENSGALG00000007047
GO:0010721	negative regulation of cell development	biological_process	0.096063	1	8	361	196	15035	ENSGALG00000007047,ENSGALG00000000653,ENSGALG00000000607,ENSGALG00000004526,ENSGALG00000011347,ENSGALG00000042626,ENSGALG00000000909,ENSGALG00000039690
GO:0003909	DNA ligase activity	molecular_function	0.096115	1	1	361	4	15035	ENSGALG00000013090
GO:0032795	heterotrimeric G-protein binding	molecular_function	0.096157	1	1	361	4	15035	ENSGALG00000023521
GO:0032278	positive regulation of gonadotropin secretion	biological_process	0.096194	1	1	361	4	15035	ENSGALG00000028770
GO:0035883	enteroendocrine cell differentiation	biological_process	0.096294	1	2	361	22	15035	ENSGALG00000010179,ENSGALG00000004285
GO:0003419	growth plate cartilage chondrocyte proliferation	biological_process	0.096419	1	1	361	4	15035	ENSGALG00000011347
GO:1903035	negative regulation of response to wounding	biological_process	0.09645	1	3	361	47	15035	ENSGALG00000009626,ENSGALG00000002987,ENSGALG00000004526
GO:0035624	receptor transactivation	biological_process	0.096504	1	1	361	4	15035	ENSGALG00000023521
GO:1990763	arrestin family protein binding	molecular_function	0.096514	1	1	361	4	15035	ENSGALG00000012894
GO:0070234	positive regulation of T cell apoptotic process	biological_process	0.096547	1	1	361	4	15035	ENSGALG00000053549
GO:0000302	response to reactive oxygen species	biological_process	0.096653	1	5	361	102	15035	ENSGALG00000033974,ENSGALG00000003521,ENSGALG00000006992,ENSGALG00000018557,ENSGALG00000000607
GO:0071675	regulation of mononuclear cell migration	biological_process	0.097654	1	2	361	22	15035	ENSGALG00000016713,ENSGALG00000038364
GO:0031399	regulation of protein modification process	biological_process	0.097707	1	34	361	1139	15035	ENSGALG00000016296,ENSGALG00000004833,ENSGALG00000028770,ENSGALG00000002766,ENSGALG00000054196,ENSGALG00000002987,ENSGALG00000006413,ENSGALG00000043555,ENSGALG00000041640,ENSGALG00000026137,ENSGALG00000006992,ENSGALG00000033974,ENSGALG00000053549,ENSGALG00000012321,ENSGALG00000043662,ENSGALG00000027786,ENSGALG00000023521,ENSGALG00000012456,ENSGALG00000003547,ENSGALG00000003589,ENSGALG00000011104,…
GO:1903844	regulation of cellular response to transforming growth factor beta stimulus	biological_process	0.097893	1	4	361	74	15035	ENSGALG00000043555,ENSGALG00000009626,ENSGALG00000030607,ENSGALG00000014686
GO:0044431	Golgi apparatus part	cellular_component	0.098009	1	14	361	403	15035	ENSGALG00000014786,ENSGALG00000010331,ENSGALG00000034975,ENSGALG00000004593,ENSGALG00000040463,ENSGALG00000009003,ENSGALG00000024056,ENSGALG00000005707,ENSGALG00000033256,ENSGALG00000004642,ENSGALG00000043172,ENSGALG00000030607,ENSGALG00000028602,ENSGALG00000016128
GO:0004784	superoxide dismutase activity	molecular_function	0.09804	1	1	361	4	15035	ENSGALG00000018557
GO:0016721	oxidoreductase activity, acting on superoxide radicals as acceptor	molecular_function	0.09804	1	1	361	4	15035	ENSGALG00000018557
GO:0019905	syntaxin binding	molecular_function	0.098043	1	3	361	47	15035	ENSGALG00000004917,ENSGALG00000009003,ENSGALG00000015332
GO:0032190	acrosin binding	molecular_function	0.098191	1	1	361	4	15035	ENSGALG00000001559
GO:0042063	gliogenesis	biological_process	0.098349	1	7	361	166	15035	ENSGALG00000014716,ENSGALG00000003589,ENSGALG00000000909,ENSGALG00000000653,ENSGALG00000000607,ENSGALG00000036497,ENSGALG00000054783
GO:0050729	positive regulation of inflammatory response	biological_process	0.098465	1	3	361	46	15035	ENSGALG00000053549,ENSGALG00000016785,ENSGALG00000026098
GO:0045334	clathrin-coated endocytic vesicle	cellular_component	0.098504	1	2	361	23	15035	ENSGALG00000015898,ENSGALG00000006413
GO:0001936	regulation of endothelial cell proliferation	biological_process	0.098521	1	4	361	74	15035	ENSGALG00000009626,ENSGALG00000004184,ENSGALG00000029819,ENSGALG00000006821
GO:0021546	rhombomere development	biological_process	0.099192	1	1	361	4	15035	ENSGALG00000003670
GO:0070372	regulation of ERK1 and ERK2 cascade	biological_process	0.099317	1	7	361	165	15035	ENSGALG00000054196,ENSGALG00000043662,ENSGALG00000002987,ENSGALG00000043555,ENSGALG00000011104,ENSGALG00000049551,ENSGALG00000003003
GO:0010799	regulation of peptidyl-threonine phosphorylation	biological_process	0.099721	1	2	361	23	15035	ENSGALG00000011104,ENSGALG00000006413
GO:0033555	multicellular organismal response to stress	biological_process	0.099869	1	3	361	47	15035	ENSGALG00000040045,ENSGALG00000008177,ENSGALG00000003560
GO:1901985	positive regulation of protein acetylation	biological_process	0.10046	1	2	361	23	15035	ENSGALG00000036497,ENSGALG00000008177
GO:0062013	positive regulation of small molecule metabolic process	biological_process	0.10098	1	4	361	74	15035	ENSGALG00000015495,ENSGALG00000011104,ENSGALG00000041640,ENSGALG00000008177
GO:0009101	glycoprotein biosynthetic process	biological_process	0.10128	1	9	361	232	15035	ENSGALG00000016128,ENSGALG00000039151,ENSGALG00000030607,ENSGALG00000034975,ENSGALG00000026991,ENSGALG00000031058,ENSGALG00000001371,ENSGALG00000024056,ENSGALG00000011347
GO:0050654	chondroitin sulfate proteoglycan metabolic process	biological_process	0.10184	1	2	361	23	15035	ENSGALG00000030607,ENSGALG00000024056
GO:0009725	response to hormone	biological_process	0.102	1	15	361	439	15035	ENSGALG00000027786,ENSGALG00000043064,ENSGALG00000028770,ENSGALG00000008177,ENSGALG00000015150,ENSGALG00000041932,ENSGALG00000014786,ENSGALG00000029836,ENSGALG00000002289,ENSGALG00000012396,ENSGALG00000003547,ENSGALG00000001559,ENSGALG00000004285,ENSGALG00000023521,ENSGALG00000012894
GO:0003417	growth plate cartilage development	biological_process	0.10227	1	2	361	23	15035	ENSGALG00000000364,ENSGALG00000011347
GO:0045860	positive regulation of protein kinase activity	biological_process	0.10231	1	11	361	301	15035	ENSGALG00000033974,ENSGALG00000006453,ENSGALG00000038241,ENSGALG00000011104,ENSGALG00000023521,ENSGALG00000009626,ENSGALG00000006413,ENSGALG00000002766,ENSGALG00000016296,ENSGALG00000053549,ENSGALG00000012321
GO:0021515	cell differentiation in spinal cord	biological_process	0.10254	1	3	361	46	15035	ENSGALG00000036497,ENSGALG00000042241,ENSGALG00000047554
GO:0032580	Golgi cisterna membrane	cellular_component	0.10282	1	2	361	23	15035	ENSGALG00000034975,ENSGALG00000028602
GO:0046634	regulation of alpha-beta T cell activation	biological_process	0.10324	1	3	361	48	15035	ENSGALG00000036142,ENSGALG00000011347,ENSGALG00000013956
GO:0140056	organelle localization by membrane tethering	biological_process	0.10395	1	3	361	49	15035	ENSGALG00000011673,ENSGALG00000014726,ENSGALG00000012092
GO:0044793	negative regulation by host of viral process	biological_process	0.10396	1	1	361	5	15035	ENSGALG00000006453
GO:0008285	negative regulation of cell proliferation	biological_process	0.10398	1	13	361	371	15035	ENSGALG00000006821,ENSGALG00000026137,ENSGALG00000004285,ENSGALG00000031997,ENSGALG00000054783,ENSGALG00000004184,ENSGALG00000029836,ENSGALG00000003521,ENSGALG00000038364,ENSGALG00000036497,ENSGALG00000009626,ENSGALG00000011347,ENSGALG00000026098
GO:0002682	regulation of immune system process	biological_process	0.10436	1	22	361	692	15035	ENSGALG00000032348,ENSGALG00000053549,ENSGALG00000014786,ENSGALG00000000731,ENSGALG00000036142,ENSGALG00000003670,ENSGALG00000003003,ENSGALG00000012456,ENSGALG00000053601,ENSGALG00000016713,ENSGALG00000006453,ENSGALG00000014716,ENSGALG00000000168,ENSGALG00000008660,ENSGALG00000033520,ENSGALG00000038364,ENSGALG00000016785,ENSGALG00000009626,ENSGALG00000013956,ENSGALG00000011347,ENSGALG00000008306,…
GO:0045776	negative regulation of blood pressure	biological_process	0.10485	1	2	361	23	15035	ENSGALG00000008177,ENSGALG00000000607
GO:0046873	metal ion transmembrane transporter activity	molecular_function	0.10511	1	12	361	340	15035	ENSGALG00000003560,ENSGALG00000009289,ENSGALG00000009003,ENSGALG00000001693,ENSGALG00000041932,ENSGALG00000005502,ENSGALG00000011040,ENSGALG00000037285,ENSGALG00000017216,ENSGALG00000038543,ENSGALG00000016804,ENSGALG00000040541
GO:0030658	transport vesicle membrane	cellular_component	0.10685	1	4	361	77	15035	ENSGALG00000014967,ENSGALG00000009289,ENSGALG00000041122,ENSGALG00000001693
GO:0001764	neuron migration	biological_process	0.10787	1	5	361	107	15035	ENSGALG00000030822,ENSGALG00000000653,ENSGALG00000007620,ENSGALG00000041640,ENSGALG00000042308
GO:0001841	neural tube formation	biological_process	0.10811	1	4	361	77	15035	ENSGALG00000047554,ENSGALG00000042308,ENSGALG00000041640,ENSGALG00000036497
GO:0008016	regulation of heart contraction	biological_process	0.10843	1	5	361	108	15035	ENSGALG00000000364,ENSGALG00000012894,ENSGALG00000008177,ENSGALG00000003163,ENSGALG00000003521
GO:0043559	insulin binding	molecular_function	0.10847	1	1	361	5	15035	ENSGALG00000014786
GO:0042303	molting cycle	biological_process	0.10847	1	2	361	24	15035	ENSGALG00000014908,ENSGALG00000007047
GO:0042633	hair cycle	biological_process	0.10847	1	2	361	24	15035	ENSGALG00000007047,ENSGALG00000014908
GO:0048704	embryonic skeletal system morphogenesis	biological_process	0.10847	1	4	361	75	15035	ENSGALG00000030607,ENSGALG00000041640,ENSGALG00000032031,ENSGALG00000040276
GO:0032147	activation of protein kinase activity	biological_process	0.10882	1	7	361	170	15035	ENSGALG00000033974,ENSGALG00000009626,ENSGALG00000038241,ENSGALG00000002766,ENSGALG00000016296,ENSGALG00000012321,ENSGALG00000023521
GO:0090235	regulation of metaphase plate congression	biological_process	0.10888	1	1	361	5	15035	ENSGALG00000008614
GO:0070940	dephosphorylation of RNA polymerase II C-terminal domain	biological_process	0.10896	1	1	361	5	15035	ENSGALG00000001489
GO:0051592	response to calcium ion	biological_process	0.10905	1	4	361	77	15035	ENSGALG00000038405,ENSGALG00000042626,ENSGALG00000029836,ENSGALG00000009626
GO:0043237	laminin-1 binding	molecular_function	0.10911	1	1	361	5	15035	ENSGALG00000042079
GO:0001957	intramembranous ossification	biological_process	0.10919	1	1	361	5	15035	ENSGALG00000041555
GO:0036072	direct ossification	biological_process	0.10919	1	1	361	5	15035	ENSGALG00000041555
GO:0031643	positive regulation of myelination	biological_process	0.10937	1	1	361	5	15035	ENSGALG00000008660
GO:0060126	somatotropin secreting cell differentiation	biological_process	0.10964	1	1	361	5	15035	ENSGALG00000015495
GO:0099011	neuronal dense core vesicle exocytosis	biological_process	0.10989	1	1	361	5	15035	ENSGALG00000042626
GO:0099525	presynaptic dense core vesicle exocytosis	biological_process	0.10989	1	1	361	5	15035	ENSGALG00000042626
GO:0002281	macrophage activation involved in immune response	biological_process	0.10991	1	1	361	5	15035	ENSGALG00000037522
GO:0010628	positive regulation of gene expression	biological_process	0.11005	1	38	361	1301	15035	ENSGALG00000041640,ENSGALG00000031997,ENSGALG00000000299,ENSGALG00000010036,ENSGALG00000007047,ENSGALG00000042241,ENSGALG00000033974,ENSGALG00000002987,ENSGALG00000015495,ENSGALG00000043555,ENSGALG00000040276,ENSGALG00000036346,ENSGALG00000034831,ENSGALG00000011104,ENSGALG00000027973,ENSGALG00000015150,ENSGALG00000037522,ENSGALG00000003670,ENSGALG00000028871,ENSGALG00000000745,ENSGALG00000004285,…
GO:0005513	detection of calcium ion	biological_process	0.11005	1	1	361	5	15035	ENSGALG00000038405
GO:0032982	myosin filament	cellular_component	0.11006	1	1	361	5	15035	ENSGALG00000006343
GO:0002686	negative regulation of leukocyte migration	biological_process	0.11014	1	2	361	24	15035	ENSGALG00000038364,ENSGALG00000000168
GO:0006821	chloride transport	biological_process	0.11023	1	4	361	78	15035	ENSGALG00000033638,ENSGALG00000007959,ENSGALG00000027423,ENSGALG00000000745
GO:0098735	positive regulation of the force of heart contraction	biological_process	0.11029	1	1	361	5	15035	ENSGALG00000008177
GO:0060753	regulation of mast cell chemotaxis	biological_process	0.11035	1	1	361	5	15035	ENSGALG00000012456
GO:0008373	sialyltransferase activity	molecular_function	0.11043	1	2	361	24	15035	ENSGALG00000039151,ENSGALG00000026991
GO:0097503	sialylation	biological_process	0.11043	1	2	361	24	15035	ENSGALG00000026991,ENSGALG00000039151
GO:0033278	cell proliferation in midbrain	biological_process	0.11051	1	1	361	5	15035	ENSGALG00000042308
GO:0070542	response to fatty acid	biological_process	0.11055	1	2	361	24	15035	ENSGALG00000043064,ENSGALG00000012396
GO:0016459	myosin complex	cellular_component	0.11068	1	3	361	50	15035	ENSGALG00000006343,ENSGALG00000011172,ENSGALG00000015898
GO:0001537	N-acetylgalactosamine 4-O-sulfotransferase activity	molecular_function	0.11081	1	1	361	5	15035	ENSGALG00000030607
GO:0043569	negative regulation of insulin-like growth factor receptor signaling pathway	biological_process	0.11082	1	1	361	5	15035	ENSGALG00000007358
GO:0038063	collagen-activated tyrosine kinase receptor signaling pathway	biological_process	0.11082	1	1	361	5	15035	ENSGALG00000036798
GO:0007589	body fluid secretion	biological_process	0.11089	1	2	361	24	15035	ENSGALG00000007305,ENSGALG00000000168
GO:0004620	phospholipase activity	molecular_function	0.11112	1	4	361	77	15035	ENSGALG00000016713,ENSGALG00000014997,ENSGALG00000014938,ENSGALG00000029836
GO:0072672	neutrophil extravasation	biological_process	0.1112	1	1	361	5	15035	ENSGALG00000053549
GO:0060605	tube lumen cavitation	biological_process	0.11125	1	1	361	5	15035	ENSGALG00000006775
GO:0060662	salivary gland cavitation	biological_process	0.11125	1	1	361	5	15035	ENSGALG00000006775
GO:0045211	postsynaptic membrane	cellular_component	0.11126	1	6	361	143	15035	ENSGALG00000016905,ENSGALG00000012894,ENSGALG00000003005,ENSGALG00000000653,ENSGALG00000003014,ENSGALG00000041225
GO:0005167	neurotrophin TRK receptor binding	molecular_function	0.11131	1	1	361	5	15035	ENSGALG00000014786
GO:0005168	neurotrophin TRKA receptor binding	molecular_function	0.11131	1	1	361	5	15035	ENSGALG00000014786
GO:0071676	negative regulation of mononuclear cell migration	biological_process	0.11163	1	1	361	5	15035	ENSGALG00000038364
GO:0010528	regulation of transposition	biological_process	0.11171	1	1	361	5	15035	ENSGALG00000011565
GO:0010529	negative regulation of transposition	biological_process	0.11171	1	1	361	5	15035	ENSGALG00000011565
GO:0051928	positive regulation of calcium ion transport	biological_process	0.1118	1	3	361	50	15035	ENSGALG00000011104,ENSGALG00000006413,ENSGALG00000000364
GO:0005520	insulin-like growth factor binding	molecular_function	0.11182	1	2	361	24	15035	ENSGALG00000038364,ENSGALG00000040672
GO:0043568	positive regulation of insulin-like growth factor receptor signaling pathway	biological_process	0.11188	1	1	361	5	15035	ENSGALG00000040672
GO:0006369	termination of RNA polymerase II transcription	biological_process	0.11201	1	1	361	5	15035	ENSGALG00000001489
GO:0050880	regulation of blood vessel size	biological_process	0.11209	1	4	361	76	15035	ENSGALG00000040045,ENSGALG00000006343,ENSGALG00000008177,ENSGALG00000002987
GO:0090197	positive regulation of chemokine secretion	biological_process	0.11219	1	1	361	5	15035	ENSGALG00000016785
GO:0009158	ribonucleoside monophosphate catabolic process	biological_process	0.11237	1	1	361	5	15035	ENSGALG00000015833
GO:0009169	purine ribonucleoside monophosphate catabolic process	biological_process	0.11237	1	1	361	5	15035	ENSGALG00000015833
GO:0010927	cellular component assembly involved in morphogenesis	biological_process	0.11241	1	4	361	78	15035	ENSGALG00000003521,ENSGALG00000011347,ENSGALG00000011086,ENSGALG00000028721
GO:0015173	aromatic amino acid transmembrane transporter activity	molecular_function	0.11243	1	1	361	5	15035	ENSGALG00000028871
GO:0042541	hemoglobin biosynthetic process	biological_process	0.11268	1	1	361	5	15035	ENSGALG00000054770
GO:0071214	cellular response to abiotic stimulus	biological_process	0.11272	1	7	361	170	15035	ENSGALG00000029836,ENSGALG00000041555,ENSGALG00000028871,ENSGALG00000014786,ENSGALG00000040275,ENSGALG00000016699,ENSGALG00000010331
GO:0104004	cellular response to environmental stimulus	biological_process	0.11272	1	7	361	170	15035	ENSGALG00000014786,ENSGALG00000016699,ENSGALG00000040275,ENSGALG00000010331,ENSGALG00000029836,ENSGALG00000041555,ENSGALG00000028871
GO:0032287	peripheral nervous system myelin maintenance	biological_process	0.11277	1	1	361	5	15035	ENSGALG00000054783
GO:1904749	regulation of protein localization to nucleolus	biological_process	0.11293	1	1	361	5	15035	ENSGALG00000043754
GO:0002118	aggressive behavior	biological_process	0.11293	1	1	361	5	15035	ENSGALG00000014944
GO:1901298	regulation of hydrogen peroxide-mediated programmed cell death	biological_process	0.11294	1	1	361	5	15035	ENSGALG00000033974
GO:0050995	negative regulation of lipid catabolic process	biological_process	0.11323	1	1	361	5	15035	ENSGALG00000023521
GO:0045471	response to ethanol	biological_process	0.11329	1	2	361	25	15035	ENSGALG00000013616,ENSGALG00000040045
GO:0042910	xenobiotic transmembrane transporter activity	molecular_function	0.11336	1	1	361	5	15035	ENSGALG00000009289
GO:1903960	negative regulation of anion transmembrane transport	biological_process	0.11336	1	1	361	5	15035	ENSGALG00000009626
GO:0015180	L-alanine transmembrane transporter activity	molecular_function	0.11341	1	1	361	5	15035	ENSGALG00000028871
GO:0015808	L-alanine transport	biological_process	0.11341	1	1	361	5	15035	ENSGALG00000028871
GO:0022858	alanine transmembrane transporter activity	molecular_function	0.11341	1	1	361	5	15035	ENSGALG00000028871
GO:0000395	mRNA 5'-splice site recognition	biological_process	0.11341	1	1	361	5	15035	ENSGALG00000015105
GO:0070120	ciliary neurotrophic factor-mediated signaling pathway	biological_process	0.11349	1	1	361	5	15035	ENSGALG00000014716
GO:0019706	protein-cysteine S-palmitoyltransferase activity	molecular_function	0.1136	1	2	361	24	15035	ENSGALG00000031372,ENSGALG00000043754
GO:0019707	protein-cysteine S-acyltransferase activity	molecular_function	0.1136	1	2	361	24	15035	ENSGALG00000043754,ENSGALG00000031372
GO:0060746	parental behavior	biological_process	0.11366	1	1	361	5	15035	ENSGALG00000040045
GO:0004706	JUN kinase kinase kinase activity	molecular_function	0.11376	1	1	361	5	15035	ENSGALG00000002766
GO:0035790	platelet-derived growth factor receptor-alpha signaling pathway	biological_process	0.11378	1	1	361	5	15035	ENSGALG00000005707
GO:0050767	regulation of neurogenesis	biological_process	0.11379	1	16	361	490	15035	ENSGALG00000014716,ENSGALG00000042308,ENSGALG00000000909,ENSGALG00000042626,ENSGALG00000016905,ENSGALG00000013616,ENSGALG00000010331,ENSGALG00000008177,ENSGALG00000008614,ENSGALG00000000653,ENSGALG00000000607,ENSGALG00000011242,ENSGALG00000009003,ENSGALG00000047554,ENSGALG00000039690,ENSGALG00000004526
GO:0045682	regulation of epidermis development	biological_process	0.11379	1	3	361	49	15035	ENSGALG00000031997,ENSGALG00000014908,ENSGALG00000007047
GO:0005527	macrolide binding	molecular_function	0.11402	1	1	361	5	15035	ENSGALG00000025764
GO:0005528	FK506 binding	molecular_function	0.11402	1	1	361	5	15035	ENSGALG00000025764
GO:0061179	negative regulation of insulin secretion involved in cellular response to glucose stimulus	biological_process	0.11413	1	1	361	5	15035	ENSGALG00000023521
GO:0097340	inhibition of cysteine-type endopeptidase activity	biological_process	0.11421	1	1	361	5	15035	ENSGALG00000008660
GO:0097341	zymogen inhibition	biological_process	0.11421	1	1	361	5	15035	ENSGALG00000008660
GO:2001256	regulation of store-operated calcium entry	biological_process	0.11425	1	1	361	5	15035	ENSGALG00000002893
GO:0045110	intermediate filament bundle assembly	biological_process	0.11428	1	1	361	5	15035	ENSGALG00000000299
GO:0031628	opioid receptor binding	molecular_function	0.11429	1	1	361	5	15035	ENSGALG00000003163
GO:0051454	intracellular pH elevation	biological_process	0.11431	1	1	361	5	15035	ENSGALG00000007959
GO:0002046	opsin binding	molecular_function	0.11462	1	1	361	5	15035	ENSGALG00000005707
GO:0044218	other organism cell membrane	cellular_component	0.1147	1	1	361	5	15035	ENSGALG00000006453
GO:0044279	other organism membrane	cellular_component	0.1147	1	1	361	5	15035	ENSGALG00000006453
GO:0048069	eye pigmentation	biological_process	0.11477	1	1	361	5	15035	ENSGALG00000011347
GO:0014910	regulation of smooth muscle cell migration	biological_process	0.11491	1	2	361	25	15035	ENSGALG00000003521,ENSGALG00000003589
GO:0014831	gastro-intestinal system smooth muscle contraction	biological_process	0.11493	1	1	361	5	15035	ENSGALG00000004593
GO:1904026	regulation of collagen fibril organization	biological_process	0.11498	1	1	361	5	15035	ENSGALG00000004833
GO:0021578	hindbrain maturation	biological_process	0.11501	1	1	361	5	15035	ENSGALG00000032320
GO:0080134	regulation of response to stress	biological_process	0.11504	1	23	361	740	15035	ENSGALG00000026137,ENSGALG00000000607,ENSGALG00000041640,ENSGALG00000033974,ENSGALG00000008306,ENSGALG00000038364,ENSGALG00000040038,ENSGALG00000015833,ENSGALG00000004526,ENSGALG00000016785,ENSGALG00000009626,ENSGALG00000002987,ENSGALG00000002766,ENSGALG00000023521,ENSGALG00000006453,ENSGALG00000000168,ENSGALG00000012481,ENSGALG00000053549,ENSGALG00000014786,ENSGALG00000037522,ENSGALG00000027786,…
GO:0061684	chaperone-mediated autophagy	biological_process	0.11514	1	1	361	5	15035	ENSGALG00000000909
GO:0090257	regulation of muscle system process	biological_process	0.11514	1	5	361	110	15035	ENSGALG00000043555,ENSGALG00000015028,ENSGALG00000003005,ENSGALG00000000364,ENSGALG00000012894
GO:0006977	DNA damage response, signal transduction by p53 class mediator resulting in cell cycle arrest	biological_process	0.11516	1	1	361	5	15035	ENSGALG00000036497
GO:0000126	transcription factor TFIIIB complex	cellular_component	0.11521	1	1	361	5	15035	ENSGALG00000002439
GO:0032960	regulation of inositol trisphosphate biosynthetic process	biological_process	0.11523	1	1	361	5	15035	ENSGALG00000015495
GO:0030388	fructose 1,6-bisphosphate metabolic process	biological_process	0.11523	1	1	361	5	15035	ENSGALG00000012613
GO:0003321	positive regulation of blood pressure by epinephrine-norepinephrine	biological_process	0.11528	1	1	361	5	15035	ENSGALG00000003521
GO:0005249	voltage-gated potassium channel activity	molecular_function	0.11544	1	4	361	78	15035	ENSGALG00000005502,ENSGALG00000037285,ENSGALG00000038543,ENSGALG00000009003
GO:0031665	negative regulation of lipopolysaccharide-mediated signaling pathway	biological_process	0.11548	1	1	361	5	15035	ENSGALG00000006453
GO:0061181	regulation of chondrocyte development	biological_process	0.11558	1	1	361	5	15035	ENSGALG00000011347
GO:1901077	regulation of relaxation of muscle	biological_process	0.11561	1	1	361	5	15035	ENSGALG00000015028
GO:0051792	medium-chain fatty acid biosynthetic process	biological_process	0.1158	1	1	361	5	15035	ENSGALG00000014938
GO:0035150	regulation of tube size	biological_process	0.11596	1	4	361	77	15035	ENSGALG00000040045,ENSGALG00000006343,ENSGALG00000008177,ENSGALG00000002987
GO:2000514	regulation of CD4-positive, alpha-beta T cell activation	biological_process	0.11603	1	2	361	25	15035	ENSGALG00000013956,ENSGALG00000036142
GO:0005113	patched binding	molecular_function	0.11639	1	1	361	5	15035	ENSGALG00000011347
GO:1902732	positive regulation of chondrocyte proliferation	biological_process	0.1164	1	1	361	5	15035	ENSGALG00000006453
GO:0006937	regulation of muscle contraction	biological_process	0.11648	1	4	361	80	15035	ENSGALG00000043555,ENSGALG00000012894,ENSGALG00000000364,ENSGALG00000003005
GO:0071333	cellular response to glucose stimulus	biological_process	0.11653	1	3	361	51	15035	ENSGALG00000011104,ENSGALG00000023521,ENSGALG00000036497
GO:0071900	regulation of protein serine/threonine kinase activity	biological_process	0.11654	1	11	361	306	15035	ENSGALG00000026137,ENSGALG00000023521,ENSGALG00000038241,ENSGALG00000006453,ENSGALG00000033974,ENSGALG00000016296,ENSGALG00000053549,ENSGALG00000012321,ENSGALG00000009626,ENSGALG00000006413,ENSGALG00000002766
GO:0061484	hematopoietic stem cell homeostasis	biological_process	0.11671	1	1	361	5	15035	ENSGALG00000038364
GO:0001609	G-protein coupled adenosine receptor activity	molecular_function	0.11678	1	1	361	5	15035	ENSGALG00000000168
GO:0051462	regulation of cortisol secretion	biological_process	0.11679	1	1	361	5	15035	ENSGALG00000007047
GO:0008343	adult feeding behavior	biological_process	0.1168	1	1	361	5	15035	ENSGALG00000038241
GO:0008499	UDP-galactose:beta-N-acetylglucosamine beta-1,3-galactosyltransferase activity	molecular_function	0.11688	1	1	361	5	15035	ENSGALG00000016128
GO:0021853	cerebral cortex GABAergic interneuron migration	biological_process	0.11715	1	1	361	5	15035	ENSGALG00000000653
GO:1904936	interneuron migration	biological_process	0.11715	1	1	361	5	15035	ENSGALG00000000653
GO:0005911	cell-cell junction	cellular_component	0.11723	1	10	361	277	15035	ENSGALG00000054783,ENSGALG00000026903,ENSGALG00000000299,ENSGALG00000016908,ENSGALG00000039356,ENSGALG00000036925,ENSGALG00000014786,ENSGALG00000040038,ENSGALG00000038364,ENSGALG00000019114
GO:0046880	regulation of follicle-stimulating hormone secretion	biological_process	0.11729	1	1	361	5	15035	ENSGALG00000028770
GO:0003407	neural retina development	biological_process	0.11733	1	3	361	50	15035	ENSGALG00000006552,ENSGALG00000011347,ENSGALG00000015150
GO:0060548	negative regulation of cell death	biological_process	0.11735	1	17	361	518	15035	ENSGALG00000006552,ENSGALG00000006992,ENSGALG00000033974,ENSGALG00000000607,ENSGALG00000041640,ENSGALG00000009626,ENSGALG00000016296,ENSGALG00000036497,ENSGALG00000038364,ENSGALG00000011104,ENSGALG00000042308,ENSGALG00000030607,ENSGALG00000029819,ENSGALG00000043064,ENSGALG00000027786,ENSGALG00000053549,ENSGALG00000014786
GO:1901031	regulation of response to reactive oxygen species	biological_process	0.11749	1	2	361	25	15035	ENSGALG00000000607,ENSGALG00000033974
GO:0008395	steroid hydroxylase activity	molecular_function	0.11751	1	2	361	24	15035	ENSGALG00000008178,ENSGALG00000008283
GO:0010675	regulation of cellular carbohydrate metabolic process	biological_process	0.11754	1	4	361	79	15035	ENSGALG00000040672,ENSGALG00000012613,ENSGALG00000015495,ENSGALG00000011104
GO:0002504	antigen processing and presentation of peptide or polysaccharide antigen via MHC class II	biological_process	0.11762	1	1	361	5	15035	ENSGALG00000009626
GO:0033085	negative regulation of T cell differentiation in thymus	biological_process	0.11779	1	1	361	5	15035	ENSGALG00000011347
GO:0008625	extrinsic apoptotic signaling pathway via death domain receptors	biological_process	0.11787	1	3	361	50	15035	ENSGALG00000009626,ENSGALG00000033974,ENSGALG00000014786
GO:0002762	negative regulation of myeloid leukocyte differentiation	biological_process	0.1179	1	2	361	25	15035	ENSGALG00000003670,ENSGALG00000014786
GO:0019230	proprioception	biological_process	0.11828	1	1	361	5	15035	ENSGALG00000042241
GO:0010811	positive regulation of cell-substrate adhesion	biological_process	0.11828	1	4	361	81	15035	ENSGALG00000042079,ENSGALG00000015253,ENSGALG00000043555,ENSGALG00000003589
GO:0007595	lactation	biological_process	0.11833	1	1	361	5	15035	ENSGALG00000007305
GO:0044557	relaxation of smooth muscle	biological_process	0.1186	1	1	361	5	15035	ENSGALG00000015028
GO:0044341	sodium-dependent phosphate transport	biological_process	0.11866	1	1	361	5	15035	ENSGALG00000031997
GO:1903037	regulation of leukocyte cell-cell adhesion	biological_process	0.11878	1	6	361	141	15035	ENSGALG00000053549,ENSGALG00000008306,ENSGALG00000011347,ENSGALG00000013956,ENSGALG00000014716,ENSGALG00000036142
GO:0043425	bHLH transcription factor binding	molecular_function	0.11888	1	2	361	25	15035	ENSGALG00000041640,ENSGALG00000040276
GO:0061056	sclerotome development	biological_process	0.11912	1	1	361	5	15035	ENSGALG00000001191
GO:0010470	regulation of gastrulation	biological_process	0.11932	1	2	361	25	15035	ENSGALG00000004285,ENSGALG00000031112
GO:0001539	cilium or flagellum-dependent cell motility	biological_process	0.11938	1	2	361	25	15035	ENSGALG00000010179,ENSGALG00000010299
GO:0060285	cilium-dependent cell motility	biological_process	0.11938	1	2	361	25	15035	ENSGALG00000010179,ENSGALG00000010299
GO:0009100	glycoprotein metabolic process	biological_process	0.11942	1	10	361	275	15035	ENSGALG00000039151,ENSGALG00000016128,ENSGALG00000030607,ENSGALG00000024056,ENSGALG00000011347,ENSGALG00000001371,ENSGALG00000004593,ENSGALG00000026991,ENSGALG00000034975,ENSGALG00000031058
GO:0051380	norepinephrine binding	molecular_function	0.11956	1	1	361	5	15035	ENSGALG00000023521
GO:0001763	morphogenesis of a branching structure	biological_process	0.11989	1	6	361	141	15035	ENSGALG00000006775,ENSGALG00000047554,ENSGALG00000036798,ENSGALG00000011347,ENSGALG00000043555,ENSGALG00000033974
GO:0010038	response to metal ion	biological_process	0.12029	1	6	361	141	15035	ENSGALG00000009626,ENSGALG00000029836,ENSGALG00000042626,ENSGALG00000006992,ENSGALG00000012613,ENSGALG00000038405
GO:0042552	myelination	biological_process	0.12048	1	4	361	80	15035	ENSGALG00000054783,ENSGALG00000030372,ENSGALG00000000653,ENSGALG00000008660
GO:0015012	heparan sulfate proteoglycan biosynthetic process	biological_process	0.12053	1	2	361	26	15035	ENSGALG00000031058,ENSGALG00000001371
GO:0045657	positive regulation of monocyte differentiation	biological_process	0.12091	1	1	361	5	15035	ENSGALG00000033520
GO:0032722	positive regulation of chemokine production	biological_process	0.12122	1	2	361	25	15035	ENSGALG00000041640,ENSGALG00000016785
GO:0031058	positive regulation of histone modification	biological_process	0.12126	1	3	361	52	15035	ENSGALG00000013956,ENSGALG00000011104,ENSGALG00000008177
GO:0048260	positive regulation of receptor-mediated endocytosis	biological_process	0.12128	1	2	361	26	15035	ENSGALG00000003589,ENSGALG00000031997
GO:0071326	cellular response to monosaccharide stimulus	biological_process	0.12191	1	3	361	52	15035	ENSGALG00000011104,ENSGALG00000036497,ENSGALG00000023521
GO:0071331	cellular response to hexose stimulus	biological_process	0.12191	1	3	361	52	15035	ENSGALG00000011104,ENSGALG00000036497,ENSGALG00000023521
GO:0015800	acidic amino acid transport	biological_process	0.12191	1	2	361	26	15035	ENSGALG00000042626,ENSGALG00000041122
GO:0032594	protein transport within lipid bilayer	biological_process	0.12238	1	2	361	26	15035	ENSGALG00000015332,ENSGALG00000009003
GO:0033993	response to lipid	biological_process	0.12242	1	13	361	380	15035	ENSGALG00000001559,ENSGALG00000004285,ENSGALG00000006453,ENSGALG00000029836,ENSGALG00000012396,ENSGALG00000003547,ENSGALG00000023542,ENSGALG00000012801,ENSGALG00000015150,ENSGALG00000037522,ENSGALG00000008177,ENSGALG00000043064,ENSGALG00000026098
GO:0043200	response to amino acid	biological_process	0.12248	1	3	361	52	15035	ENSGALG00000031112,ENSGALG00000036798,ENSGALG00000041555
GO:0045598	regulation of fat cell differentiation	biological_process	0.12276	1	4	361	80	15035	ENSGALG00000039209,ENSGALG00000010386,ENSGALG00000005968,ENSGALG00000030140
GO:1902803	regulation of synaptic vesicle transport	biological_process	0.12322	1	3	361	53	15035	ENSGALG00000012894,ENSGALG00000042626,ENSGALG00000015332
GO:2000300	regulation of synaptic vesicle exocytosis	biological_process	0.12322	1	3	361	53	15035	ENSGALG00000015332,ENSGALG00000042626,ENSGALG00000012894
GO:0030195	negative regulation of blood coagulation	biological_process	0.12324	1	2	361	26	15035	ENSGALG00000002987,ENSGALG00000009626
GO:1900047	negative regulation of hemostasis	biological_process	0.12324	1	2	361	26	15035	ENSGALG00000009626,ENSGALG00000002987
GO:1901342	regulation of vasculature development	biological_process	0.12335	1	7	361	176	15035	ENSGALG00000009626,ENSGALG00000004184,ENSGALG00000016945,ENSGALG00000006821,ENSGALG00000011200,ENSGALG00000036189,ENSGALG00000043754
GO:0002832	negative regulation of response to biotic stimulus	biological_process	0.12353	1	2	361	25	15035	ENSGALG00000006453,ENSGALG00000008306
GO:0009311	oligosaccharide metabolic process	biological_process	0.12358	1	2	361	25	15035	ENSGALG00000016128,ENSGALG00000012613
GO:0045621	positive regulation of lymphocyte differentiation	biological_process	0.12366	1	3	361	52	15035	ENSGALG00000011347,ENSGALG00000013956,ENSGALG00000053549
GO:0042089	cytokine biosynthetic process	biological_process	0.12404	1	3	361	51	15035	ENSGALG00000009626,ENSGALG00000033256,ENSGALG00000028770
GO:0010761	fibroblast migration	biological_process	0.12438	1	2	361	26	15035	ENSGALG00000009626,ENSGALG00000038364
GO:1904951	positive regulation of establishment of protein localization	biological_process	0.12493	1	8	361	208	15035	ENSGALG00000041640,ENSGALG00000011104,ENSGALG00000004917,ENSGALG00000036497,ENSGALG00000014786,ENSGALG00000016785,ENSGALG00000006413,ENSGALG00000030545
GO:0040007	growth	biological_process	0.12555	1	18	361	567	15035	ENSGALG00000000364,ENSGALG00000026137,ENSGALG00000004285,ENSGALG00000007047,ENSGALG00000012613,ENSGALG00000041640,ENSGALG00000008614,ENSGALG00000038364,ENSGALG00000033520,ENSGALG00000040672,ENSGALG00000004526,ENSGALG00000011347,ENSGALG00000015495,ENSGALG00000002893,ENSGALG00000015089,ENSGALG00000030607,ENSGALG00000042626,ENSGALG00000016905
GO:0050865	regulation of cell activation	biological_process	0.12568	1	10	361	278	15035	ENSGALG00000008660,ENSGALG00000014716,ENSGALG00000008306,ENSGALG00000012456,ENSGALG00000036142,ENSGALG00000011347,ENSGALG00000013956,ENSGALG00000009626,ENSGALG00000053549,ENSGALG00000016785
GO:1903706	regulation of hemopoiesis	biological_process	0.12577	1	8	361	208	15035	ENSGALG00000008306,ENSGALG00000036142,ENSGALG00000003670,ENSGALG00000013956,ENSGALG00000011347,ENSGALG00000014786,ENSGALG00000053549,ENSGALG00000033520
GO:0099612	protein localization to axon	biological_process	0.12585	1	1	361	6	15035	ENSGALG00000000653
GO:1902107	positive regulation of leukocyte differentiation	biological_process	0.12713	1	4	361	81	15035	ENSGALG00000011347,ENSGALG00000013956,ENSGALG00000033520,ENSGALG00000053549
GO:0019674	NAD metabolic process	biological_process	0.12724	1	2	361	26	15035	ENSGALG00000003558,ENSGALG00000004642
GO:0031340	positive regulation of vesicle fusion	biological_process	0.12725	1	1	361	6	15035	ENSGALG00000004917
GO:2001257	regulation of cation channel activity	biological_process	0.12737	1	4	361	82	15035	ENSGALG00000006992,ENSGALG00000032506,ENSGALG00000007047,ENSGALG00000048923
GO:0070206	protein trimerization	biological_process	0.12754	1	2	361	26	15035	ENSGALG00000002766,ENSGALG00000041555
GO:0070371	ERK1 and ERK2 cascade	biological_process	0.12762	1	7	361	176	15035	ENSGALG00000049551,ENSGALG00000003003,ENSGALG00000054196,ENSGALG00000043662,ENSGALG00000002987,ENSGALG00000011104,ENSGALG00000043555
GO:0048568	embryonic organ development	biological_process	0.12764	1	10	361	276	15035	ENSGALG00000040276,ENSGALG00000014686,ENSGALG00000041640,ENSGALG00000042308,ENSGALG00000030607,ENSGALG00000032031,ENSGALG00000003670,ENSGALG00000031112,ENSGALG00000033256,ENSGALG00000011347
GO:0008046	axon guidance receptor activity	molecular_function	0.12798	1	1	361	6	15035	ENSGALG00000007620
GO:0098794	postsynapse	cellular_component	0.12809	1	11	361	321	15035	ENSGALG00000016905,ENSGALG00000009003,ENSGALG00000008177,ENSGALG00000001716,ENSGALG00000003005,ENSGALG00000000168,ENSGALG00000015332,ENSGALG00000012894,ENSGALG00000000653,ENSGALG00000041225,ENSGALG00000003014
GO:0050714	positive regulation of protein secretion	biological_process	0.12815	1	5	361	112	15035	ENSGALG00000011104,ENSGALG00000004917,ENSGALG00000041640,ENSGALG00000036497,ENSGALG00000016785
GO:0009991	response to extracellular stimulus	biological_process	0.12833	1	8	361	210	15035	ENSGALG00000016296,ENSGALG00000043754,ENSGALG00000028770,ENSGALG00000013616,ENSGALG00000028871,ENSGALG00000023542,ENSGALG00000038241,ENSGALG00000011104
GO:1903539	protein localization to postsynaptic membrane	biological_process	0.12836	1	2	361	27	15035	ENSGALG00000015332,ENSGALG00000009003
GO:1990504	dense core granule exocytosis	biological_process	0.12843	1	1	361	6	15035	ENSGALG00000042626
GO:0007272	ensheathment of neurons	biological_process	0.12879	1	4	361	82	15035	ENSGALG00000030372,ENSGALG00000000653,ENSGALG00000054783,ENSGALG00000008660
GO:0008366	axon ensheathment	biological_process	0.12879	1	4	361	82	15035	ENSGALG00000000653,ENSGALG00000030372,ENSGALG00000054783,ENSGALG00000008660
GO:0004623	phospholipase A2 activity	molecular_function	0.1288	1	2	361	26	15035	ENSGALG00000016713,ENSGALG00000014938
GO:0009968	negative regulation of signal transduction	biological_process	0.1288	1	23	361	753	15035	ENSGALG00000029819,ENSGALG00000053601,ENSGALG00000030607,ENSGALG00000006453,ENSGALG00000040276,ENSGALG00000019312,ENSGALG00000027786,ENSGALG00000030140,ENSGALG00000004593,ENSGALG00000010386,ENSGALG00000006821,ENSGALG00000012613,ENSGALG00000007358,ENSGALG00000000607,ENSGALG00000031997,ENSGALG00000014686,ENSGALG00000041640,ENSGALG00000033974,ENSGALG00000006992,ENSGALG00000038364,ENSGALG00000014908,…
GO:1990124	messenger ribonucleoprotein complex	cellular_component	0.12895	1	1	361	6	15035	ENSGALG00000000299
GO:0010749	regulation of nitric oxide mediated signal transduction	biological_process	0.12899	1	1	361	6	15035	ENSGALG00000009626
GO:0030054	cell junction	cellular_component	0.1292	1	16	361	502	15035	ENSGALG00000053601,ENSGALG00000054783,ENSGALG00000012894,ENSGALG00000026903,ENSGALG00000041225,ENSGALG00000036925,ENSGALG00000014786,ENSGALG00000003005,ENSGALG00000000299,ENSGALG00000016908,ENSGALG00000003014,ENSGALG00000039356,ENSGALG00000038364,ENSGALG00000019114,ENSGALG00000040038,ENSGALG00000009003
GO:0042107	cytokine metabolic process	biological_process	0.12929	1	3	361	52	15035	ENSGALG00000028770,ENSGALG00000033256,ENSGALG00000009626
GO:0005544	calcium-dependent phospholipid binding	molecular_function	0.12947	1	3	361	53	15035	ENSGALG00000012092,ENSGALG00000004917,ENSGALG00000042626
GO:0060693	regulation of branching involved in salivary gland morphogenesis	biological_process	0.12961	1	1	361	6	15035	ENSGALG00000033974
GO:0071320	cellular response to cAMP	biological_process	0.12989	1	2	361	27	15035	ENSGALG00000041932,ENSGALG00000007959
GO:0032051	clathrin light chain binding	molecular_function	0.12994	1	1	361	6	15035	ENSGALG00000028602
GO:0006972	hyperosmotic response	biological_process	0.12999	1	1	361	6	15035	ENSGALG00000040275
GO:0043065	positive regulation of apoptotic process	biological_process	0.13	1	11	361	313	15035	ENSGALG00000001502,ENSGALG00000028770,ENSGALG00000036497,ENSGALG00000053549,ENSGALG00000006775,ENSGALG00000009626,ENSGALG00000009179,ENSGALG00000031997,ENSGALG00000029836,ENSGALG00000002121,ENSGALG00000006992
GO:0042981	regulation of apoptotic process	biological_process	0.13047	1	24	361	786	15035	ENSGALG00000030607,ENSGALG00000042308,ENSGALG00000029819,ENSGALG00000003547,ENSGALG00000011104,ENSGALG00000053549,ENSGALG00000014786,ENSGALG00000006775,ENSGALG00000001502,ENSGALG00000040045,ENSGALG00000043064,ENSGALG00000009179,ENSGALG00000027786,ENSGALG00000031997,ENSGALG00000041640,ENSGALG00000006552,ENSGALG00000006992,ENSGALG00000033974,ENSGALG00000002121,ENSGALG00000029836,ENSGALG00000016296,…
GO:0016012	sarcoglycan complex	cellular_component	0.13052	1	1	361	6	15035	ENSGALG00000029917
GO:0050819	negative regulation of coagulation	biological_process	0.13065	1	2	361	27	15035	ENSGALG00000002987,ENSGALG00000009626
GO:0061178	regulation of insulin secretion involved in cellular response to glucose stimulus	biological_process	0.13078	1	2	361	27	15035	ENSGALG00000023521,ENSGALG00000011104
GO:0030239	myofibril assembly	biological_process	0.13087	1	3	361	53	15035	ENSGALG00000003521,ENSGALG00000028721,ENSGALG00000011086
GO:1903307	positive regulation of regulated secretory pathway	biological_process	0.13123	1	2	361	27	15035	ENSGALG00000004917,ENSGALG00000042626
GO:1904019	epithelial cell apoptotic process	biological_process	0.1314	1	3	361	53	15035	ENSGALG00000009626,ENSGALG00000029819,ENSGALG00000031997
GO:0035637	multicellular organismal signaling	biological_process	0.13149	1	4	361	84	15035	ENSGALG00000038241,ENSGALG00000011040,ENSGALG00000003005,ENSGALG00000004526
GO:0007628	adult walking behavior	biological_process	0.13182	1	2	361	27	15035	ENSGALG00000000653,ENSGALG00000042241
GO:0043068	positive regulation of programmed cell death	biological_process	0.13193	1	11	361	314	15035	ENSGALG00000009626,ENSGALG00000009179,ENSGALG00000036497,ENSGALG00000053549,ENSGALG00000006775,ENSGALG00000001502,ENSGALG00000028770,ENSGALG00000006992,ENSGALG00000029836,ENSGALG00000002121,ENSGALG00000031997
GO:0046638	positive regulation of alpha-beta T cell differentiation	biological_process	0.13196	1	2	361	27	15035	ENSGALG00000011347,ENSGALG00000013956
GO:0009147	pyrimidine nucleoside triphosphate metabolic process	biological_process	0.13205	1	2	361	26	15035	XLOC_040994,ENSGALG00000007305
GO:0051640	organelle localization	biological_process	0.13233	1	13	361	393	15035	ENSGALG00000012894,ENSGALG00000014726,ENSGALG00000010820,ENSGALG00000012456,ENSGALG00000011673,ENSGALG00000012092,ENSGALG00000008614,ENSGALG00000015332,ENSGALG00000004917,ENSGALG00000042626,ENSGALG00000032506,ENSGALG00000005707,ENSGALG00000009003
GO:0005044	scavenger receptor activity	molecular_function	0.13242	1	4	361	80	15035	ENSGALG00000036142,ENSGALG00000013090,ENSGALG00000047283,ENSGALG00000003589
GO:0019368	fatty acid elongation, unsaturated fatty acid	biological_process	0.13248	1	1	361	6	15035	ENSGALG00000012748
GO:0034625	fatty acid elongation, monounsaturated fatty acid	biological_process	0.13248	1	1	361	6	15035	ENSGALG00000012748
GO:0034626	fatty acid elongation, polyunsaturated fatty acid	biological_process	0.13248	1	1	361	6	15035	ENSGALG00000012748
GO:0102336	3-oxo-arachidoyl-CoA synthase activity	molecular_function	0.13248	1	1	361	6	15035	ENSGALG00000012748
GO:0102337	3-oxo-cerotoyl-CoA synthase activity	molecular_function	0.13248	1	1	361	6	15035	ENSGALG00000012748
GO:0102338	3-oxo-lignoceronyl-CoA synthase activity	molecular_function	0.13248	1	1	361	6	15035	ENSGALG00000012748
GO:0102756	very-long-chain 3-ketoacyl-CoA synthase activity	molecular_function	0.13248	1	1	361	6	15035	ENSGALG00000012748
GO:0006024	glycosaminoglycan biosynthetic process	biological_process	0.13254	1	2	361	27	15035	ENSGALG00000024056,ENSGALG00000030607
GO:0042629	mast cell granule	cellular_component	0.13278	1	1	361	6	15035	ENSGALG00000010820
GO:0048638	regulation of developmental growth	biological_process	0.13291	1	8	361	214	15035	ENSGALG00000008614,ENSGALG00000007047,ENSGALG00000002893,ENSGALG00000041640,ENSGALG00000011347,ENSGALG00000015495,ENSGALG00000042626,ENSGALG00000004526
GO:0005484	SNAP receptor activity	molecular_function	0.13291	1	2	361	27	15035	ENSGALG00000011673,ENSGALG00000009003
GO:0000137	Golgi cis cisterna	cellular_component	0.13339	1	1	361	6	15035	ENSGALG00000028602
GO:0042908	xenobiotic transport	biological_process	0.13353	1	1	361	6	15035	ENSGALG00000009289
GO:2000316	regulation of T-helper 17 type immune response	biological_process	0.13367	1	1	361	6	15035	ENSGALG00000036142
GO:2000319	regulation of T-helper 17 cell differentiation	biological_process	0.13367	1	1	361	6	15035	ENSGALG00000036142
GO:0014048	regulation of glutamate secretion	biological_process	0.13368	1	1	361	6	15035	ENSGALG00000042626
GO:0060033	anatomical structure regression	biological_process	0.13372	1	1	361	6	15035	ENSGALG00000036346
GO:0043589	skin morphogenesis	biological_process	0.13386	1	1	361	6	15035	ENSGALG00000041555
GO:1903054	negative regulation of extracellular matrix organization	biological_process	0.1339	1	1	361	6	15035	ENSGALG00000004833
GO:0090196	regulation of chemokine secretion	biological_process	0.13396	1	1	361	6	15035	ENSGALG00000016785
GO:0010421	hydrogen peroxide-mediated programmed cell death	biological_process	0.1341	1	1	361	6	15035	ENSGALG00000033974
GO:0097468	programmed cell death in response to reactive oxygen species	biological_process	0.1341	1	1	361	6	15035	ENSGALG00000033974
GO:0035148	tube formation	biological_process	0.13411	1	5	361	114	15035	ENSGALG00000006775,ENSGALG00000041640,ENSGALG00000042308,ENSGALG00000036497,ENSGALG00000047554
GO:2000051	negative regulation of non-canonical Wnt signaling pathway	biological_process	0.13416	1	1	361	6	15035	ENSGALG00000031997
GO:0002693	positive regulation of cellular extravasation	biological_process	0.13424	1	1	361	6	15035	ENSGALG00000053549
GO:0046085	adenosine metabolic process	biological_process	0.13429	1	1	361	6	15035	ENSGALG00000015833
GO:0019932	second-messenger-mediated signaling	biological_process	0.1343	1	9	361	247	15035	ENSGALG00000008177,ENSGALG00000013616,ENSGALG00000009626,ENSGALG00000023521,ENSGALG00000010820,ENSGALG00000003003,ENSGALG00000007047,ENSGALG00000012396,ENSGALG00000011104
GO:0072109	glomerular mesangium development	biological_process	0.13439	1	1	361	6	15035	ENSGALG00000006343
GO:0031995	insulin-like growth factor II binding	molecular_function	0.13439	1	1	361	6	15035	ENSGALG00000040672
GO:0022406	membrane docking	biological_process	0.13443	1	3	361	55	15035	ENSGALG00000011673,ENSGALG00000014726,ENSGALG00000012092
GO:0032585	multivesicular body membrane	cellular_component	0.13443	1	1	361	6	15035	ENSGALG00000028602
GO:0035845	photoreceptor cell outer segment organization	biological_process	0.13449	1	1	361	6	15035	ENSGALG00000005707
GO:0035581	sequestering of extracellular ligand from receptor	biological_process	0.13453	1	1	361	6	15035	ENSGALG00000014686
GO:0071692	protein localization to extracellular region	biological_process	0.13453	1	1	361	6	15035	ENSGALG00000014686
GO:0071694	maintenance of protein location in extracellular region	biological_process	0.13453	1	1	361	6	15035	ENSGALG00000014686
GO:1900115	extracellular regulation of signal transduction	biological_process	0.13453	1	1	361	6	15035	ENSGALG00000014686
GO:1900116	extracellular negative regulation of signal transduction	biological_process	0.13453	1	1	361	6	15035	ENSGALG00000014686
GO:0031630	regulation of synaptic vesicle fusion to presynaptic active zone membrane	biological_process	0.13461	1	1	361	6	15035	ENSGALG00000015332
GO:0007435	salivary gland morphogenesis	biological_process	0.13462	1	2	361	28	15035	ENSGALG00000033974,ENSGALG00000006775
GO:0009128	purine nucleoside monophosphate catabolic process	biological_process	0.13467	1	1	361	6	15035	ENSGALG00000015833
GO:0044848	biological phase	biological_process	0.13469	1	1	361	6	15035	ENSGALG00000007047
GO:0044851	hair cycle phase	biological_process	0.13469	1	1	361	6	15035	ENSGALG00000007047
GO:0048819	regulation of hair follicle maturation	biological_process	0.13469	1	1	361	6	15035	ENSGALG00000007047
GO:0019336	phenol-containing compound catabolic process	biological_process	0.13487	1	1	361	6	15035	ENSGALG00000040045
GO:0045852	pH elevation	biological_process	0.13494	1	1	361	6	15035	ENSGALG00000007959
GO:0033077	T cell differentiation in thymus	biological_process	0.13497	1	3	361	53	15035	ENSGALG00000003670,ENSGALG00000011347,ENSGALG00000053549
GO:0016712	oxidoreductase activity, acting on paired donors, with incorporation or reduction of molecular oxygen, reduced flavin or flavoprotein as one donor, and incorporation of one atom of oxygen	molecular_function	0.13504	1	2	361	26	15035	ENSGALG00000008283,ENSGALG00000008178
GO:0051643	endoplasmic reticulum localization	biological_process	0.13508	1	1	361	6	15035	ENSGALG00000012092
GO:0072431	signal transduction involved in mitotic G1 DNA damage checkpoint	biological_process	0.13524	1	1	361	6	15035	ENSGALG00000036497
GO:1902400	intracellular signal transduction involved in G1 DNA damage checkpoint	biological_process	0.13524	1	1	361	6	15035	ENSGALG00000036497
GO:0034374	low-density lipoprotein particle remodeling	biological_process	0.1353	1	1	361	6	15035	ENSGALG00000016713
GO:2000772	regulation of cellular senescence	biological_process	0.13549	1	2	361	27	15035	ENSGALG00000041640,ENSGALG00000026137
GO:0031062	positive regulation of histone methylation	biological_process	0.13558	1	2	361	28	15035	ENSGALG00000011104,ENSGALG00000013956
GO:0004985	opioid receptor activity	molecular_function	0.13575	1	1	361	6	15035	ENSGALG00000013616
GO:0004869	cysteine-type endopeptidase inhibitor activity	molecular_function	0.13582	1	2	361	27	15035	ENSGALG00000008660,ENSGALG00000006453
GO:0071347	cellular response to interleukin-1	biological_process	0.13591	1	3	361	53	15035	ENSGALG00000054196,ENSGALG00000049551,ENSGALG00000003003
GO:0097421	liver regeneration	biological_process	0.13608	1	1	361	6	15035	ENSGALG00000004593
GO:0032891	negative regulation of organic acid transport	biological_process	0.13608	1	1	361	6	15035	ENSGALG00000009626
GO:0006970	response to osmotic stress	biological_process	0.13615	1	2	361	28	15035	ENSGALG00000040038,ENSGALG00000040275
GO:1903430	negative regulation of cell maturation	biological_process	0.13617	1	1	361	6	15035	ENSGALG00000007047
GO:0051103	DNA ligation involved in DNA repair	biological_process	0.13626	1	1	361	6	15035	ENSGALG00000013090
GO:0032471	negative regulation of endoplasmic reticulum calcium ion concentration	biological_process	0.1363	1	1	361	6	15035	ENSGALG00000006775
GO:0031284	positive regulation of guanylate cyclase activity	biological_process	0.13631	1	1	361	6	15035	ENSGALG00000008177
GO:0043255	regulation of carbohydrate biosynthetic process	biological_process	0.13635	1	3	361	54	15035	ENSGALG00000011104,ENSGALG00000015495,ENSGALG00000012613
GO:0021626	central nervous system maturation	biological_process	0.13657	1	1	361	6	15035	ENSGALG00000032320
GO:0005035	death receptor activity	molecular_function	0.13662	1	1	361	6	15035	ENSGALG00000039461
GO:0032695	negative regulation of interleukin-12 production	biological_process	0.13663	1	1	361	6	15035	ENSGALG00000009626
GO:2000833	positive regulation of steroid hormone secretion	biological_process	0.13664	1	1	361	6	15035	ENSGALG00000007047
GO:0070208	protein heterotrimerization	biological_process	0.13665	1	1	361	6	15035	ENSGALG00000041555
GO:0002544	chronic inflammatory response	biological_process	0.1367	1	1	361	6	15035	ENSGALG00000009626
GO:0043950	positive regulation of cAMP-mediated signaling	biological_process	0.1367	1	1	361	6	15035	ENSGALG00000008177
GO:0001999	renal response to blood flow involved in circulatory renin-angiotensin regulation of systemic arterial blood pressure	biological_process	0.13692	1	1	361	6	15035	ENSGALG00000033256
GO:0002001	renin secretion into blood stream	biological_process	0.13692	1	1	361	6	15035	ENSGALG00000033256
GO:0030214	hyaluronan catabolic process	biological_process	0.13694	1	1	361	6	15035	ENSGALG00000006413
GO:0003211	cardiac ventricle formation	biological_process	0.13694	1	1	361	6	15035	ENSGALG00000036497
GO:0031998	regulation of fatty acid beta-oxidation	biological_process	0.13696	1	1	361	6	15035	ENSGALG00000041640
GO:0071639	positive regulation of monocyte chemotactic protein-1 production	biological_process	0.13703	1	1	361	6	15035	ENSGALG00000041640
GO:0003100	regulation of systemic arterial blood pressure by endothelin	biological_process	0.13709	1	1	361	6	15035	ENSGALG00000031343
GO:0010941	regulation of cell death	biological_process	0.13711	1	26	361	867	15035	ENSGALG00000043064,ENSGALG00000009179,ENSGALG00000027786,ENSGALG00000053549,ENSGALG00000014786,ENSGALG00000006775,ENSGALG00000040045,ENSGALG00000001502,ENSGALG00000003547,ENSGALG00000011104,ENSGALG00000042308,ENSGALG00000030607,ENSGALG00000029819,ENSGALG00000009626,ENSGALG00000036497,ENSGALG00000016296,ENSGALG00000028770,ENSGALG00000038364,ENSGALG00000006992,ENSGALG00000006552,ENSGALG00000002121,…
GO:0031514	motile cilium	cellular_component	0.13716	1	4	361	83	15035	ENSGALG00000010299,XLOC_023902,ENSGALG00000005707,ENSGALG00000007959
GO:2001046	positive regulation of integrin-mediated signaling pathway	biological_process	0.13717	1	1	361	6	15035	ENSGALG00000036142
GO:0032780	negative regulation of ATPase activity	biological_process	0.13747	1	1	361	6	15035	ENSGALG00000006453
GO:0055089	fatty acid homeostasis	biological_process	0.13754	1	1	361	6	15035	ENSGALG00000043064
GO:0005794	Golgi apparatus	cellular_component	0.1376	1	25	361	839	15035	ENSGALG00000030607,ENSGALG00000006440,ENSGALG00000002893,ENSGALG00000016128,ENSGALG00000039151,ENSGALG00000008660,ENSGALG00000014786,ENSGALG00000034975,ENSGALG00000010331,ENSGALG00000042626,ENSGALG00000040463,ENSGALG00000004593,ENSGALG00000015898,ENSGALG00000024056,ENSGALG00000043172,ENSGALG00000011242,ENSGALG00000004642,ENSGALG00000011673,ENSGALG00000028602,ENSGALG00000026991,XLOC_104865,ENSGALG…
GO:0004955	prostaglandin receptor activity	molecular_function	0.13776	1	1	361	6	15035	ENSGALG00000012396
GO:0065010	extracellular membrane-bounded organelle	cellular_component	0.13784	1	1	361	6	15035	ENSGALG00000023542
GO:0072378	blood coagulation, fibrin clot formation	biological_process	0.13788	1	1	361	6	15035	ENSGALG00000012802
GO:0004936	alpha-adrenergic receptor activity	molecular_function	0.13794	1	1	361	6	15035	ENSGALG00000023521
GO:0031102	neuron projection regeneration	biological_process	0.1383	1	2	361	28	15035	ENSGALG00000004526,ENSGALG00000000909
GO:0033084	regulation of immature T cell proliferation in thymus	biological_process	0.13836	1	1	361	6	15035	ENSGALG00000011347
GO:0043277	apoptotic cell clearance	biological_process	0.13844	1	2	361	28	15035	ENSGALG00000009626,ENSGALG00000006775
GO:0044062	regulation of excretion	biological_process	0.13845	1	1	361	6	15035	ENSGALG00000000364
GO:0016417	S-acyltransferase activity	molecular_function	0.13852	1	2	361	27	15035	ENSGALG00000043754,ENSGALG00000031372
GO:0010966	regulation of phosphate transport	biological_process	0.13898	1	1	361	6	15035	ENSGALG00000031997
GO:2000542	negative regulation of gastrulation	biological_process	0.13928	1	1	361	6	15035	ENSGALG00000031112
GO:0016886	ligase activity, forming phosphoric ester bonds	molecular_function	0.13934	1	1	361	6	15035	ENSGALG00000013090
GO:1903825	organic acid transmembrane transport	biological_process	0.13949	1	4	361	84	15035	ENSGALG00000028871,ENSGALG00000009626,ENSGALG00000041122,ENSGALG00000040541
GO:1905039	carboxylic acid transmembrane transport	biological_process	0.13949	1	4	361	84	15035	ENSGALG00000040541,ENSGALG00000028871,ENSGALG00000009626,ENSGALG00000041122
GO:0043400	cortisol secretion	biological_process	0.13959	1	1	361	6	15035	ENSGALG00000007047
GO:0090659	walking behavior	biological_process	0.13961	1	2	361	28	15035	ENSGALG00000000653,ENSGALG00000042241
GO:0021894	cerebral cortex GABAergic interneuron development	biological_process	0.13967	1	1	361	6	15035	ENSGALG00000000653
GO:0071493	cellular response to UV-B	biological_process	0.1397	1	1	361	6	15035	ENSGALG00000010331
GO:0030097	hemopoiesis	biological_process	0.13974	1	16	361	498	15035	ENSGALG00000008306,ENSGALG00000036497,ENSGALG00000010915,ENSGALG00000033520,ENSGALG00000014908,ENSGALG00000015495,ENSGALG00000013956,ENSGALG00000011347,ENSGALG00000040276,ENSGALG00000037522,ENSGALG00000014786,ENSGALG00000053549,ENSGALG00000034975,ENSGALG00000026098,ENSGALG00000036142,ENSGALG00000003670
GO:0002251	organ or tissue specific immune response	biological_process	0.13993	1	1	361	6	15035	ENSGALG00000006453
GO:0002385	mucosal immune response	biological_process	0.13993	1	1	361	6	15035	ENSGALG00000006453
GO:0035587	purinergic receptor signaling pathway	biological_process	0.14003	1	2	361	27	15035	ENSGALG00000000168,ENSGALG00000000653
GO:0043299	leukocyte degranulation	biological_process	0.14028	1	2	361	28	15035	ENSGALG00000010820,ENSGALG00000012456
GO:0046920	alpha-(1->3)-fucosyltransferase activity	molecular_function	0.14035	1	1	361	6	15035	ENSGALG00000034975
GO:0031663	lipopolysaccharide-mediated signaling pathway	biological_process	0.14095	1	2	361	28	15035	ENSGALG00000006453,ENSGALG00000012801
GO:0003416	endochondral bone growth	biological_process	0.141	1	2	361	28	15035	ENSGALG00000000364,ENSGALG00000011347
GO:0042923	neuropeptide binding	molecular_function	0.14141	1	1	361	6	15035	ENSGALG00000013616
[truncated: 3,220 more rows]
